# Supplementary material
Source: PubMed Central journal article supplement (PMC3729040)
Supplement: NIHMS474885-supplement-1.pdf [file NIHMS474885-supplement-1.pdf]

# **SUPPLEMENTARY INFORMATION**

## **Recurrent somatic mutation of *FAT1* in multiple human cancers leads to aberrant Wnt activation**

Luc G.T. Morris<sup>1,2</sup>, Andrew M. Kaufman<sup>1</sup>, Yongxing Gong<sup>1</sup>, Deepa Ramaswami<sup>1</sup>, Logan A. Walsh<sup>1</sup>, Sevin Turcan<sup>1</sup>, Stephanie Eng<sup>1</sup>, Kasthuri Kannan<sup>1</sup>, Yilong Zou<sup>1</sup>, Luke Peng<sup>1</sup>, Victoria E. Banuchi<sup>2</sup>, Phillip Paty<sup>3</sup>, Zhaoshi Zeng<sup>3</sup>, Efsevia Vakiani<sup>4</sup>, David Solit<sup>1,5</sup>, Bhuvanesh Singh<sup>2</sup>, Ian Ganly<sup>2</sup>, Linda Liao<sup>6</sup>, Timothy C. Cloughesy<sup>6</sup>, Paul S. Mischel<sup>6</sup>, Ingo K. Mellinghoff<sup>1,7,9</sup>, and Timothy A. Chan<sup>1,8,9</sup>

<sup>1</sup>Human Oncology and Pathogenesis Program, Memorial Sloan-Kettering Cancer Center, 1275 York Avenue, New York, New York, 10065, USA.

<sup>2</sup>Department of Surgery, Head and Neck Service, Memorial Sloan-Kettering Cancer Center, 1275 York Avenue, New York, New York, 10065, USA.

<sup>3</sup>Department of Surgery, Colorectal Service, Memorial Sloan-Kettering Cancer Center, 1275 York Avenue, New York, New York, 10065, USA.

<sup>4</sup>Department of Pathology, Memorial Sloan-Kettering Cancer Center, 1275 York Avenue, New York, New York, 10065, USA.

<sup>5</sup>Department of Medicine, Memorial Sloan-Kettering Cancer Center, New York, NY 10065, USA.

<sup>6</sup>David Geffen School of Medicine, University of California at Los Angeles, Los Angeles, CA 90095.

<sup>7</sup>Department of Neurology, Memorial Sloan-Kettering Cancer Center, New York, NY 10065, USA.

<sup>8</sup>Department of Radiation Oncology, Memorial Sloan-Kettering Cancer Center, New York, NY 10065, USA.

<sup>9</sup>Brain Tumor Center, Memorial Sloan-Kettering Cancer Center, New York, NY 10065, USA.

a

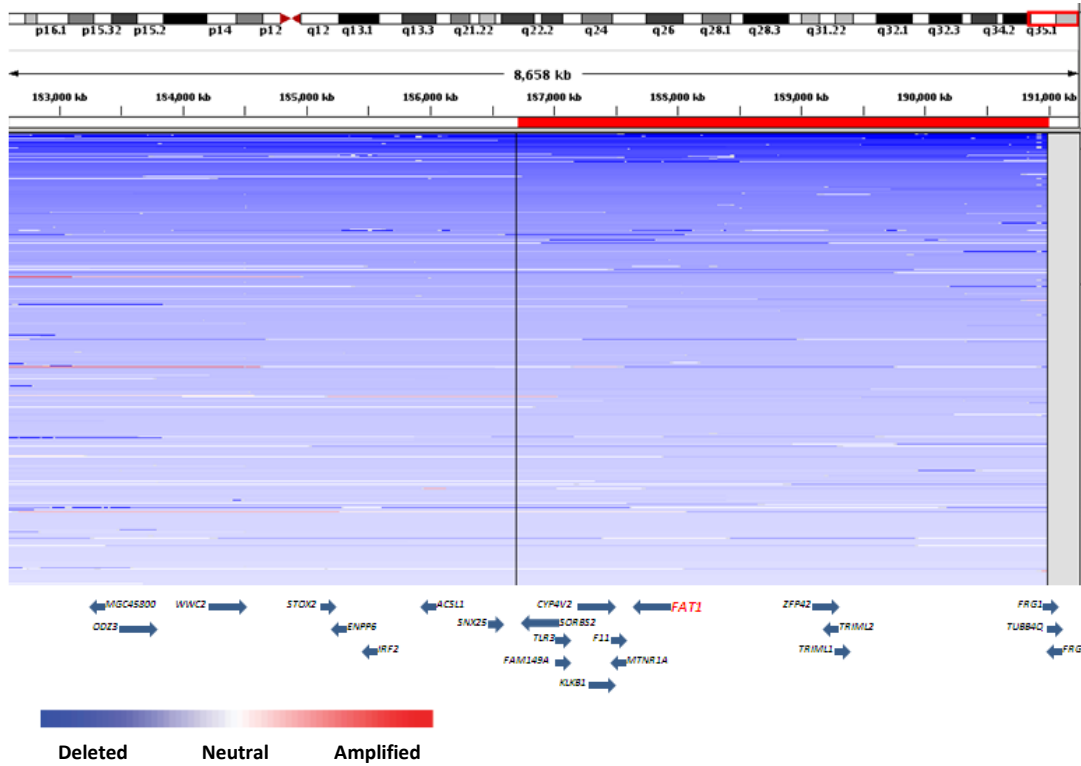

b

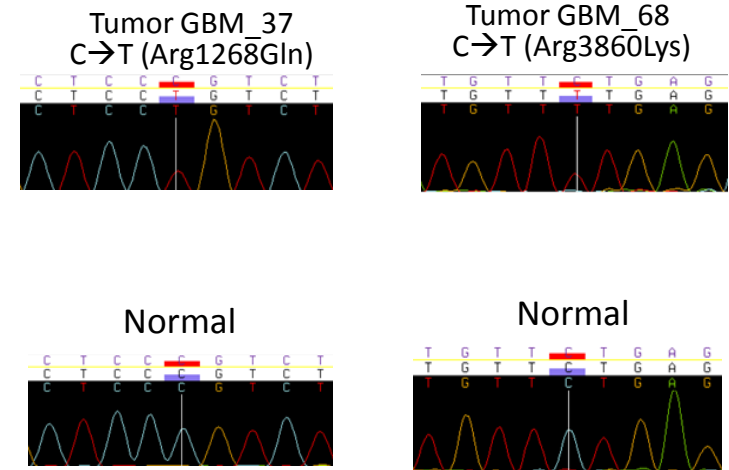

**Supplementary Figure 1. Copy number alterations and somatic mutations in *FAT1*.**

(a) Array CGH segmentation map showing deletions on chromosome 4q35 in the Tumorscape dataset (genomic coordinates at top). A 4,310 kilobase peak region of deletion (highlighted at top in red) encompasses 14 genes. For convenience of viewing, tumors have been sorted by extent of deletion in this peak region (color legend, bottom right), and top 600 (20%) tumors shown. Genes in this region, and surrounding genes, are indicated with blue arrows.

(b) Sequencing traces of representative tumors (top row) with *FAT1* mutations, and verified matched normal samples (bottom row). Vertical lines designate mutation sites. (Although the Arg1268Qln mutation is annotated in dbSNP (rs113970444), a somatic mutation was identified in tumor, but not matching normal tissue).

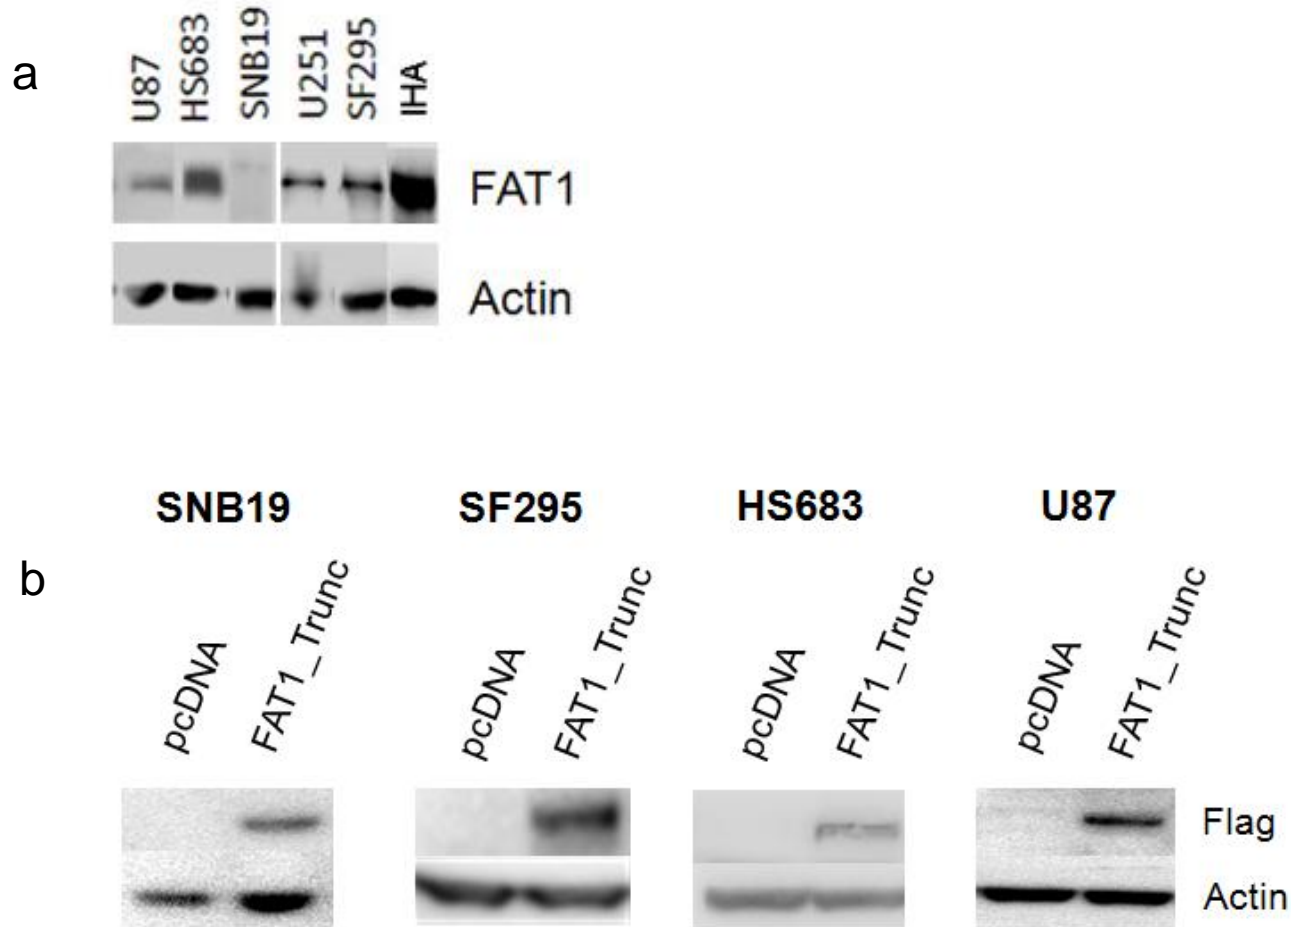

**Supplementary Figure 2. Endogenous FAT1 and transfected FAT1\_Trunc protein expression.**

(a) FAT1 protein expression levels across glioma and immortalized human astrocyte cell lines. Western blot analysis of cell lines using FAT1 antibody, and actin as loading control. Equal amounts of protein (60 $\mu$ g) were loaded in each lane. IHA, immortalized human astrocytes.

(b) Western Blots of expression of FAT1\_Trunc, after transient transfection in cell lines indicated.

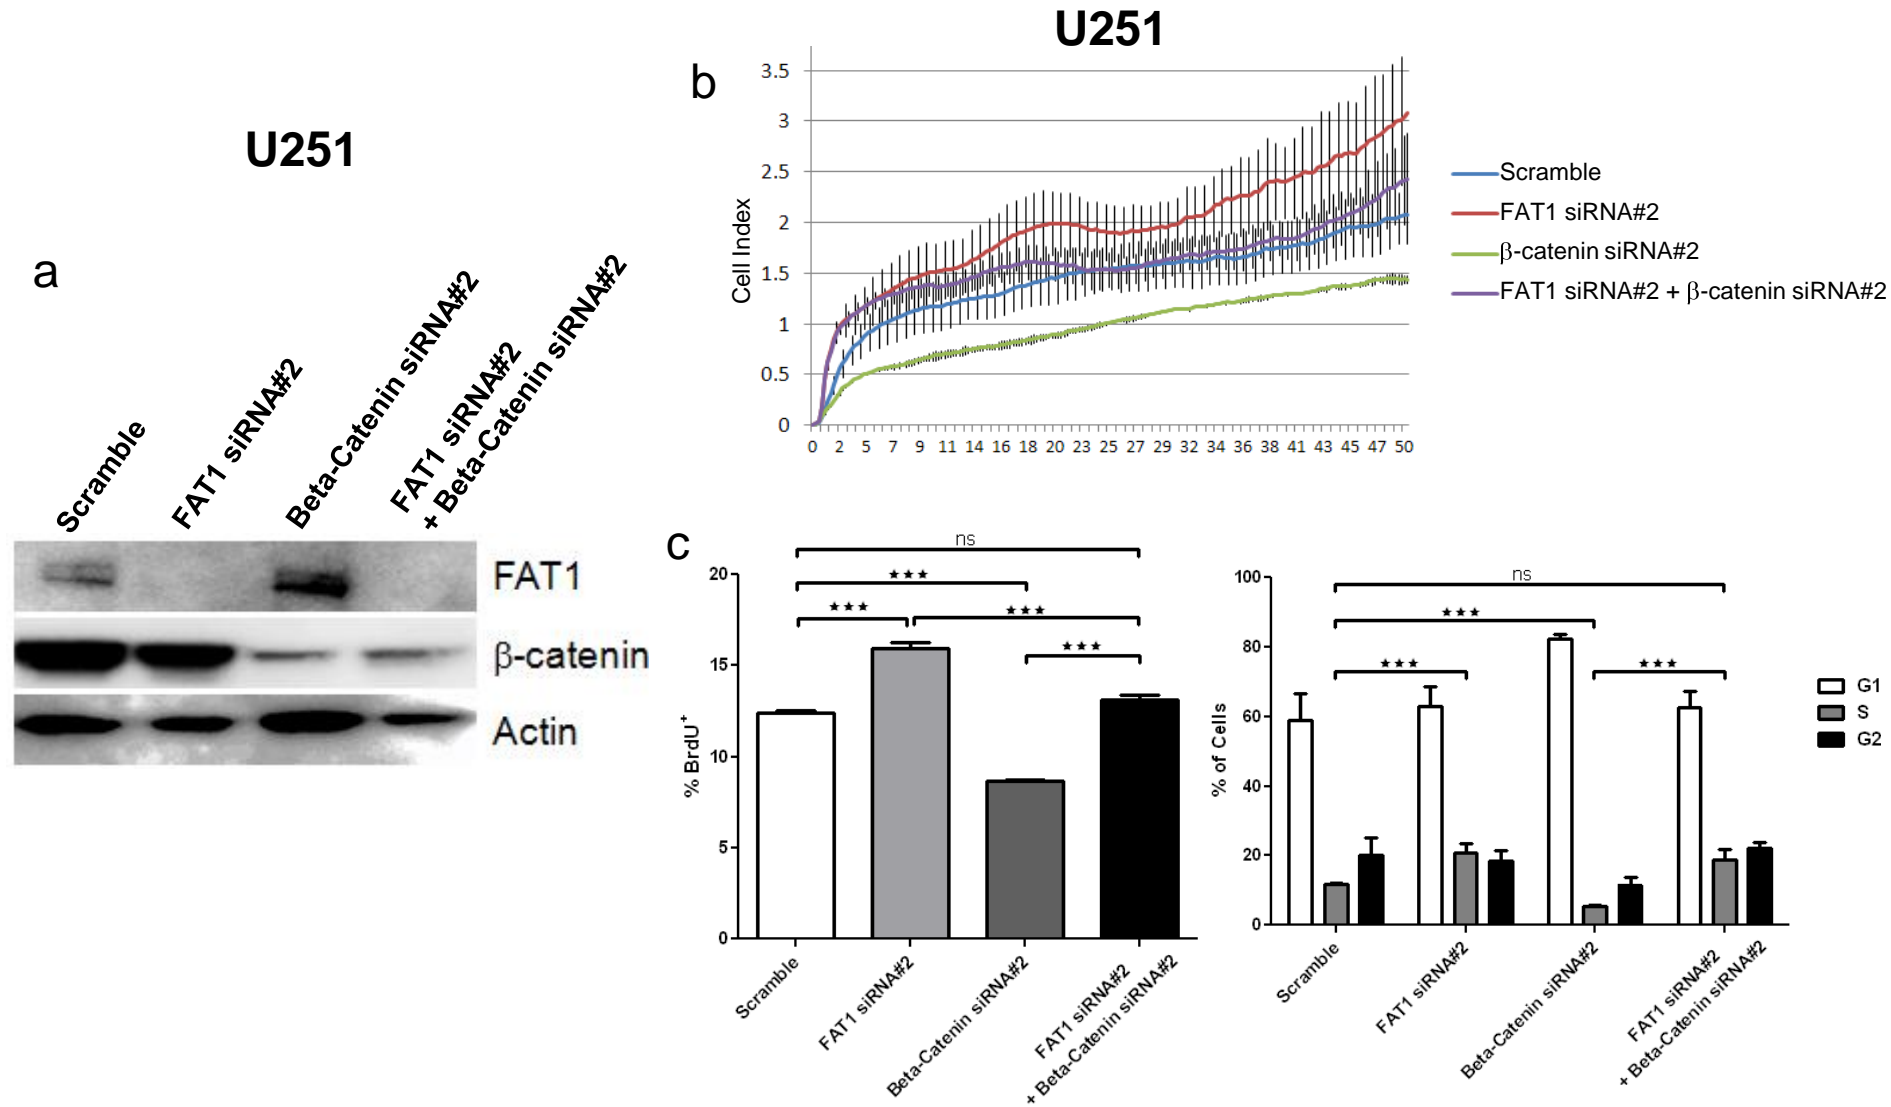

**Supplementary Figure 3. Effects on cell growth after depletion of FAT1, β-catenin, or both. (a)** Western blot showing co-transfection of siRNAs targeting FAT1 and β-catenin, in U251 glioma cells, using siRNAs distinct from those in Figs. 6d-f. **(b)** Growth curve demonstrating accelerated growth after FAT1 knockdown, reversed by concurrent knockdown of β-catenin. Experiments performed in quadruplicate, using the xCELLigence system. **(c)** BrdU and cell cycle assays demonstrate enhancement in DNA synthesis and cells in S phase, after FAT1 knockdown, repressed with concurrent β-catenin knockdown. \*\*\* $p < .001$ ; ns, nonsignificant.

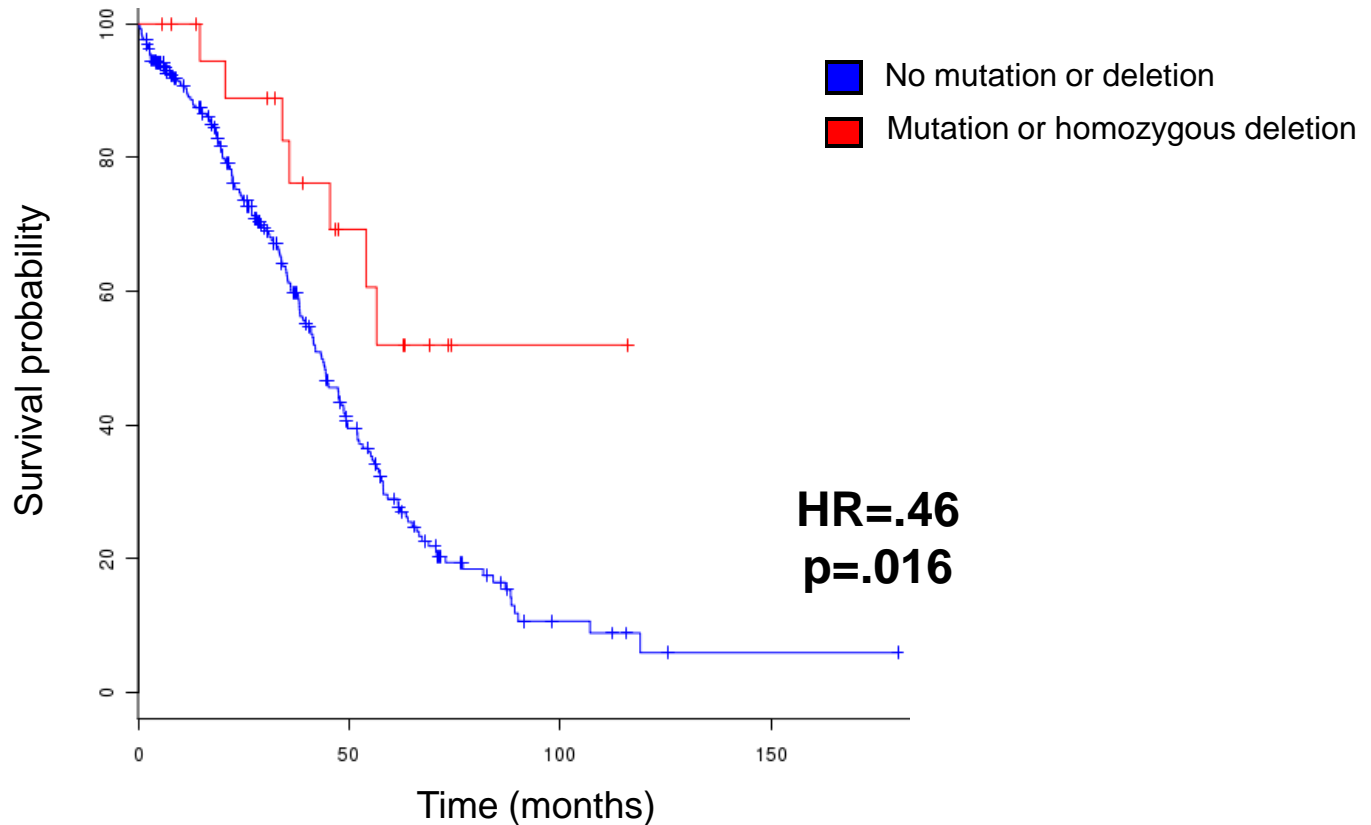

**Supplementary Figure 4. Impact of FAT1 homozygous deletion or mutation on survival, among patients in The Cancer Genome Atlas ovarian cancer dataset.** Patients with tumors harboring FAT1 mutated or deleted tumors experienced significantly longer survival.

Colon cancer samples

|      | FAT 1 | APC   | AXIN1 | AXIN2 | CTNNB1 | GSK3B | TCF4 |
|------|-------|-------|-------|-------|--------|-------|------|
| S118 | gray  | green | gray  | gray  | gray   | gray  | gray |
| S119 | gray  | gray  | gray  | gray  | gray   | gray  | gray |
| S120 | gray  | green | gray  | gray  | gray   | gray  | gray |
| S121 | gray  | green | gray  | gray  | gray   | gray  | gray |
| S122 | gray  | green | gray  | gray  | gray   | gray  | gray |
| S152 | green | green | gray  | gray  | gray   | gray  | gray |
| S167 | green | gray  | gray  | gray  | gray   | gray  | gray |
| S228 | green | gray  | gray  | gray  | gray   | gray  | gray |

**Supplementary Figure 5. Mutational profile of Wnt/ $\beta$ -catenin pathway genes in colorectal tumors harboring wild-type or mutated *FAT1*.** Green, mutated; gray, wild-type. Sequencing was done on the colorectal tumors as listed in Table 1 using Sanger sequencing.

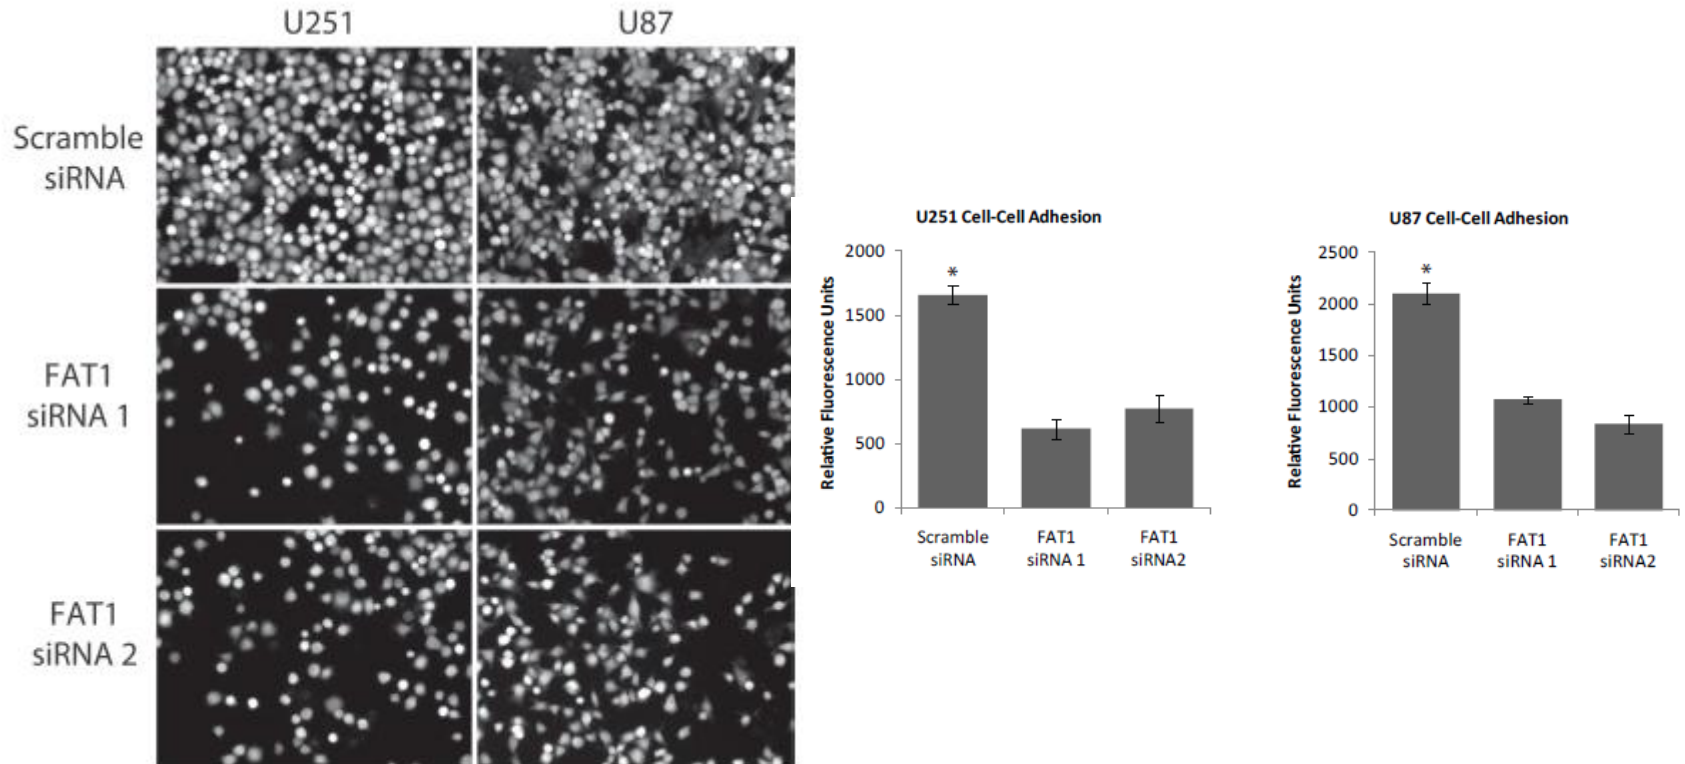

**Supplementary Figure 6. Knockdown of FAT1 in GBM cell lines impairs cell-cell adhesion.** Representative images on the left, and fluorescence-based quantification on the right. Error bars represent standard deviation, comparisons made with ANOVA. \*  $p < 0.05$ .

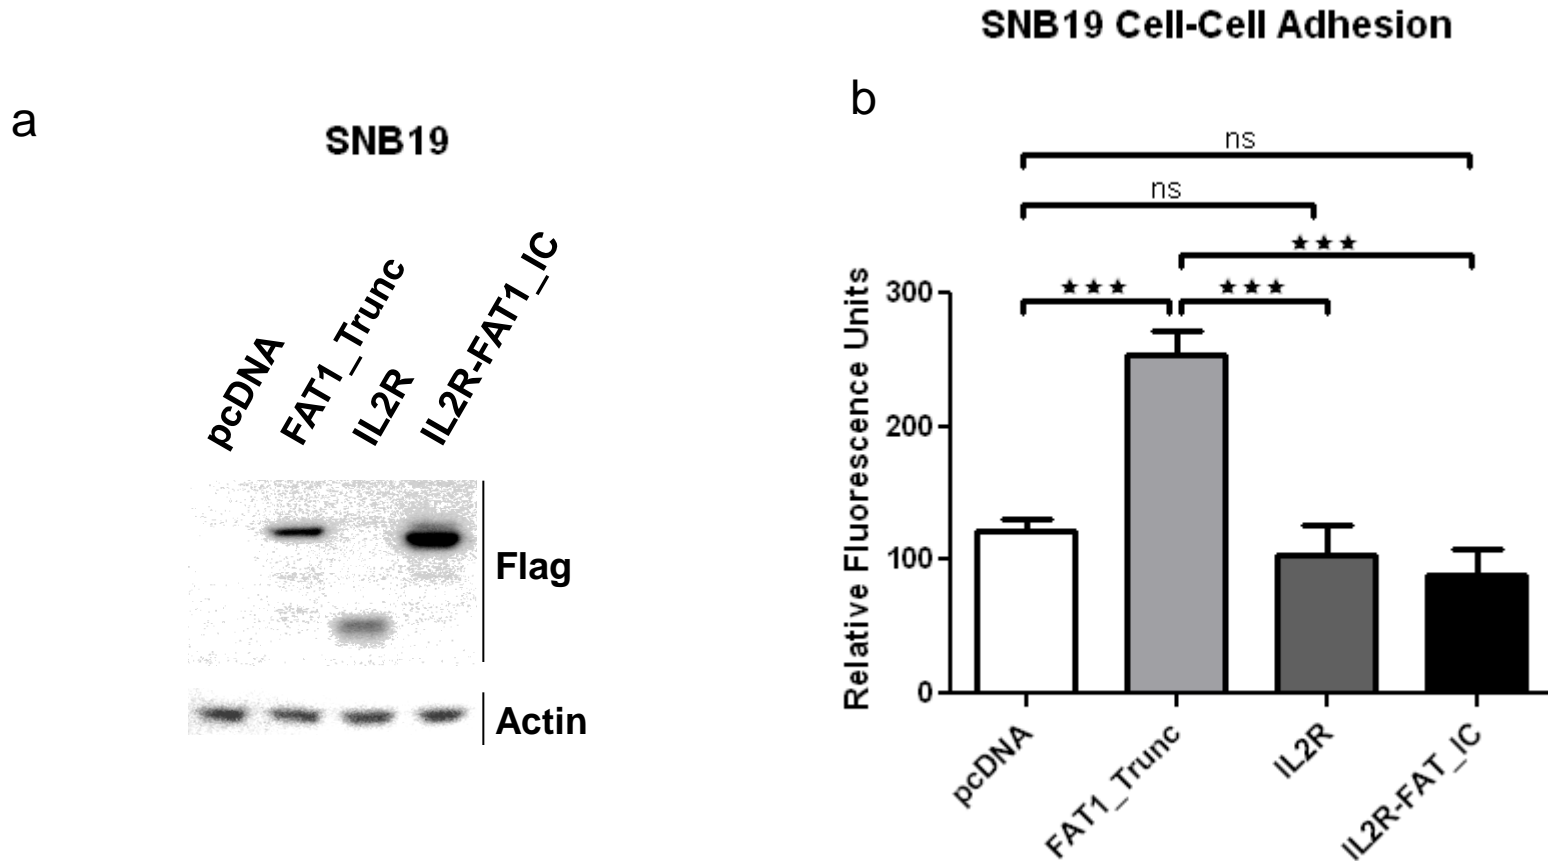

**Supplementary Figure 7. Adhesion effects of a non-adhesive FAT1 construct. (a)** A non-adhesive FAT1 protein was created by fusing the extracellular and transmembrane portions of the IL2 receptor to the intracytoplasmic tail of FAT1, denoted “IL2R-FAT1\_IC.” The IL2R $\alpha$  receptor was used as an additional control, “IL2R.” **(b)** Cell-cell adhesion was measured using the fluorescence-based assay in SNB19 glioma cells. Expression of FAT1\_Trunc increased cell-cell adhesion, compared to pcDNA empty vector. There was no increase in cell-cell adhesion seen with IL2R, or IL2R-FAT\_IC. \*\*\*  $p < .001$



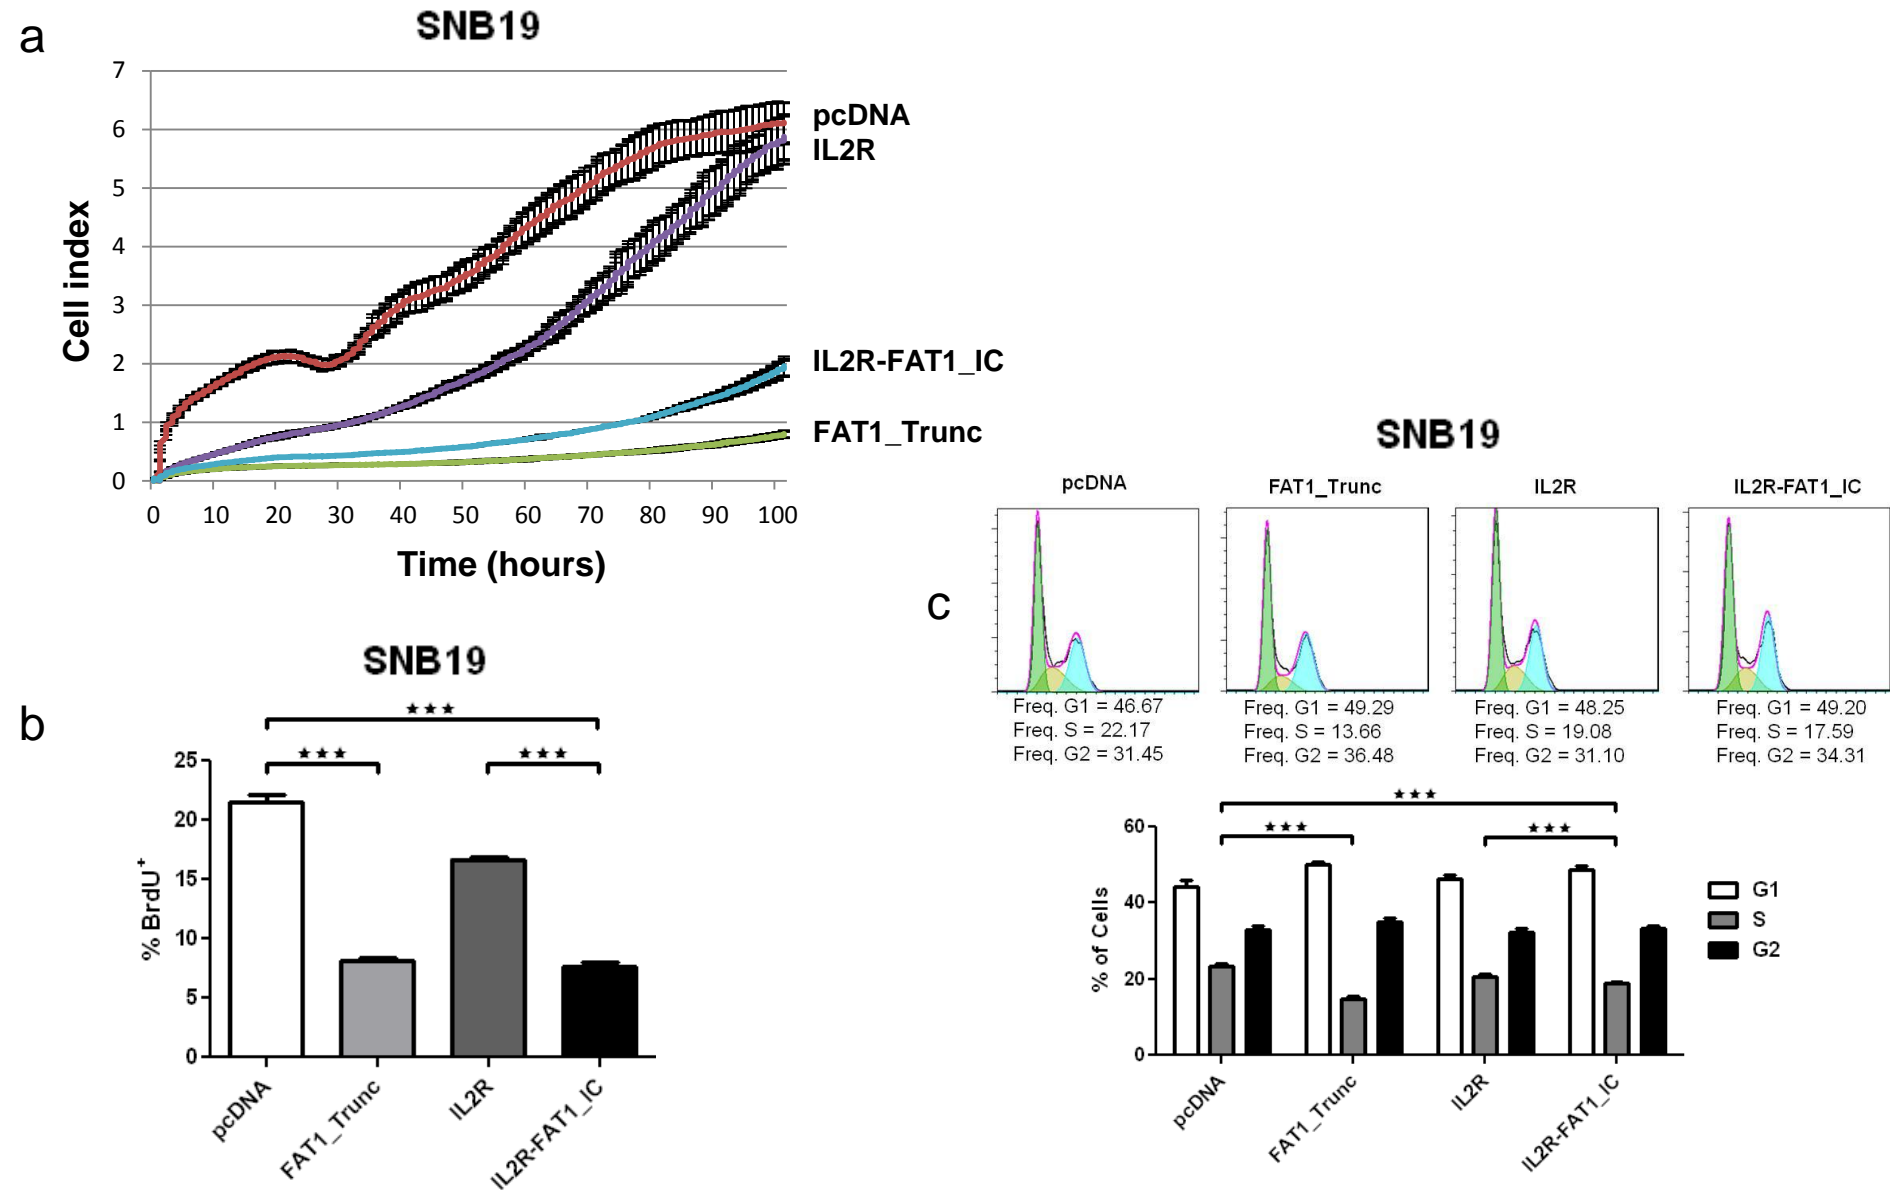

**Supplementary Figure 8. The intracytoplasmic region of FAT1 is sufficient to suppress glioma cell growth in an adhesion-independent manner.** (a) Growth curve, (b) BrdU and (c) cell cycle assays, of SNB19 glioma cells transfected with FAT1\_Trunc, non-adhesive IL2R-FAT1\_Trunc, and empty vector and IL2R controls, demonstrate consistent suppression of growth with both FAT1 proteins. \*\*\* $p < .001$

## Supplementary Table 1.

### Frequency of deletion at 4q35.2, by cancer subset, in Tumorscape dataset

| Cancer Subset                  | # genes in peak | Q-value  | Frequency of Deletion |        |            |
|--------------------------------|-----------------|----------|-----------------------|--------|------------|
|                                |                 |          | Overall               | Focal  | High-level |
| <i>All cancers</i>             | 14              | 5.08E-56 | 0.2664                | 0.0744 | 0.0093     |
| <i>All epithelial cancers</i>  | 14              | 2.64E-42 | 0.3602                | 0.0916 | 0.0114     |
| <i>All lung cancers</i>        | 41              | 1.78E-15 | 0.3527                | 0.1047 | 0.0039     |
| Lung (non-small cell)          | 41              | 4.79E-15 | 0.337                 | 0.1064 | 0.0027     |
| Melanoma                       | 20              | 1.91E-06 | 0.4865                | 0.1081 | 0.045      |
| Hepatocellular                 | 41              | 0.00335  | 0.3223                | 0.0579 | 0.0165     |
| Colorectal                     | 36              | 0.00371  | 0.3416                | 0.0683 | 0          |
| <i>All hematologic cancers</i> | 60              | 0.00858  | 0.0386                | 0.02   | 0          |
| Prostate                       | 90              | 0.00996  | 0.2391                | 0.1087 | 0.0217     |
| Renal                          | 120             | 0.0183   | 0.2778                | 0.0476 | 0.0079     |
| Medulloblastoma                | 177             | 0.0912   | 0.0938                | 0.0469 | 0          |
| <i>All neural cancers</i>      | 102             | 0.202    | 0.1429                | 0.0369 | 0          |
| Esophageal squamous            | 56              | 0.271    | 0.4318                | 0.1136 | 0.0227     |
| Acute lymphoblastic leukemia   |                 | 3.01E-05 | 0.0588                | 0.0332 | 0          |
| Breast                         |                 | 1.53E-04 | 0.3251                | 0.1029 | 0.0165     |
| Lung (small cell)              |                 | 0.525    | 0.65                  | 0.075  | 0.025      |
| Ovarian                        |                 | 0.542    | 0.3689                | 0.068  | 0          |
| Myeloproliferative disorder    |                 | 1        | 0.0047                | 0      | 0          |

Q-value is the false discovery rate-adjusted likelihood of the identified deletion occurring by chance.

URL for Tumorscape dataset portal: <http://www.broadinstitute.org/tumorscape/>

Reference: Beroukhi et al, "The landscape of somatic copy-number alteration across human cancers" (2010), Nature, 18:899-905.

## Supplementary Table 2.

### Genes located within peak region of deletion at 4q35.2

| <b>Gene ID</b> | <b>Gene name</b>                                      |
|----------------|-------------------------------------------------------|
| CYP4V2         | cytochrome P450, family 4, subfamily V, polypeptide 2 |
| F11            | coagulation factor XI                                 |
| FAM149A        | family with sequence similarity 149, member A         |
| FAT1           | FAT tumor suppressor homolog 1 (Drosophila)           |
| FRG1           | FSHD region gene 1                                    |
| FRG2           | FSHD region gene 2                                    |
| KLKB1          | kallikrein B, plasma (Fletcher factor) 1              |
| MTNR1A         | melatonin receptor 1A                                 |
| SORBS2         | sorbin and SH3 domain containing 2                    |
| TLR3           | toll-like receptor 3                                  |
| TRIML1         | tripartite motif family-like 1                        |
| TRIML2         | tripartite motif family-like 2                        |
| TUBB4Q         | tubulin, beta polypeptide 4, member Q, pseudogene     |
| ZFP42          | zinc finger protein 42 homolog (mouse)                |

URL for Tumorscape dataset portal: <http://www.broadinstitute.org/tumorscape/>

Reference: Beroukhi et al, "The landscape of somatic copy-number alteration across human cancers" (2010), Nature, 18:899-905.

### Supplementary Table 3.

#### Prediction of FAT1 mutation consequences by Polyphen-2.

| GENE | POSITION | WILD-TYPE<br>AMINO<br>ACID | MUTANT<br>AMINO<br>ACID | WILD-TYPE<br>NUCLEOTIDE | MUTANT<br>NUCLEOTIDE | POLYPHEN<br>CLASSIFICATION | PROBABILITY  | FDR           |
|------|----------|----------------------------|-------------------------|-------------------------|----------------------|----------------------------|--------------|---------------|
| FAT1 | 4511     | Thr                        | Ile                     | C                       | T                    | neutral                    | 0.054        | 0.191         |
| FAT1 | 4419     | Ala                        | Ser                     | G                       | T                    | neutral                    | 0.005        | 0.267         |
| FAT1 | 4310     | Pro                        | Leu                     | C                       | T                    | <b>deleterious</b>         | <b>1</b>     | <b>0.0109</b> |
| FAT1 | 4309     | Pro                        | Ala                     | C                       | G                    | <b>deleterious</b>         | <b>1</b>     | <b>0.0109</b> |
| FAT1 | 3860     | Arg                        | Lys                     | G                       | A                    | <b>deleterious</b>         | <b>0.65</b>  | <b>0.121</b>  |
| FAT1 | 3310     | Gly                        | Gly                     | G                       | A                    | <b>deleterious</b>         | <b>1</b>     | <b>0.0109</b> |
| FAT1 | 3124     | Glu                        | Lys                     | G                       | A                    | neutral                    | 0.025        | 0.213         |
| FAT1 | 2496     | Glu                        | Lys                     | G                       | A                    | <b>deleterious</b>         | <b>0.984</b> | <b>0.065</b>  |
| FAT1 | 2004     | Ile                        | Met                     | T                       | G                    | <b>deleterious</b>         | <b>0.539</b> | <b>0.128</b>  |
| FAT1 | 1268     | Arg                        | Gln                     | G                       | A                    | <b>deleterious</b>         | <b>1</b>     | <b>0.0109</b> |
| FAT1 | 809      | His                        | Arg                     | A                       | G                    | neutral                    | 0.036        | 0.202         |
| FAT1 | 636      | Ala                        | Thr                     | G                       | A                    | neutral                    | 0.002        | 0.452         |
| FAT1 | 313      | Lys                        | Asn                     | G                       | C                    | <b>deleterious</b>         | <b>0.822</b> | <b>0.101</b>  |
| FAT1 | 306      | Val                        | Met                     | G                       | A                    | neutral                    | 0.03         | 0.206         |
| FAT1 | 146      | Arg                        | Met                     | C                       | Deletion             | <b>deleterious</b>         | <b>1</b>     | <b>0.0109</b> |

#### SOURCES:

PolyPhen-2 v2.2.2r394

URL: <http://genetics.bwh.harvard.edu/pph2/>

Reference: Adzhubei IA, Schmidt S, Peshkin L, Ramensky VE, Gerasimova A, Bork P, Kondrashov AS, Sunyaev SR. Nature Methods **7**(4):248-249 (2010).

Sequences: UniProtKB/UniRef100 Release 2011\_12 (14-Dec-2011)

Structures: PDB/DSSP Snapshot 03-Jan-2012 (78304 Structures)

Genes: UCSC MultiZ46Way GRCh37/hg19 (08-Oct-2009)

**Supplementary Table 4.****FAT1 mutational status in cancer cell lines.**

| <b><u>Cell line</u></b> | <b><u>Origin</u></b>               | <b><u>FAT1 Mutation(s)</u></b>       |
|-------------------------|------------------------------------|--------------------------------------|
| COLO320                 | colon adenocarcinoma               | -                                    |
| DLD1                    | colon adenocarcinoma               | Ala1480Asp (Heterozygous)            |
| HCT116                  | colon adenocarcinoma               | -                                    |
| HT29                    | colon adenocarcinoma               | -                                    |
| RKO                     | colon adenocarcinoma               | Leu3199Arg/Lys3200Asn frameshift     |
| HS683                   | glioma                             | -                                    |
| SF268                   | glioma                             | -                                    |
| SF295                   | glioma                             | -                                    |
| SF539                   | glioma                             | -                                    |
| SKMG3                   | glioma                             | -                                    |
| SNB19                   | glioma                             | -                                    |
| U118                    | glioma                             | -                                    |
| U251                    | glioma                             | -                                    |
| U87 <sup>1</sup>        | glioma                             | -                                    |
| MDA-1586                | head and neck squamous cell cancer | -                                    |
| OSCC3                   | head and neck squamous cell cancer | Arg1268Gln (Homozygous) <sup>2</sup> |
| SCC25                   | head and neck squamous cell cancer | -                                    |

1. The U87 cell line genome has been sequenced, with no FAT1 mutations identified.  
(Clark et al, PLoS Genetics 2010:e1000832; PMID 20126413)

2. The Arg1268Gln mutation was also identified as a somatic mutation in tumor GBM\_37;  
it is also listed as a polymorphism in dbSNP (rs113970444).

**Supplementary Table 6.**

**Results of pathway analyses, based on genes differentially expressed after FAT1 knockdown.**

**1. INGENUITY PATHWAY ANALYSIS**

| Canonical Pathway                              | p value      | -log(p)     | Ratio       | Pathway components                                                                                                                                                                                                                                                                        |
|------------------------------------------------|--------------|-------------|-------------|-------------------------------------------------------------------------------------------------------------------------------------------------------------------------------------------------------------------------------------------------------------------------------------------|
| Molecular Mechanisms of Cancer                 | 3.3E-05      | 4.48        | 0.12        | RAP2B,RALA,SMAD3,LRP6,KRAS,PSEN2,MAPK13,FZD1,JAK2,TGFBR2,E2F6,LAMTOR3,CASP9 (includes EG:100140945),RHOB,BBC3,ARHGEF2,HIPK2,RHOF,CASP8,PRKD3,PRKDC,CDC25C,PMAIP1,CCNE2,NRAS,PAK2,GNAS,ARHGEF12,PIK3C2A,DVL1,GNAQ,AURKA,TCF3,APC,GNAI3,FZD8,CCND3,PRKCI,RRAS2,PTPN11,RND3,PRKCD,E2F1,CFLAR |
| Polyamine Regulation in Colon Cancer           | 0.00048      | 3.32        | 0.24        | PSME1,AZIN1,PSME2,PSME4,OAZ2,KRAS,APC<br>PPP1CC,PPP1CB,KRAS,PPP1R14B,ROCK2,E2F6,STMN1,ARHGEF2,PRKD3,CCNE2,NRAS,ARHGEF12,GNAS,PIK3C2A,PPP2R5C,ITPR2,PPP2R1B                                                                                                                                |
| Breast Cancer Regulation by Stathmin1          | 0.001        | 3.16        | 0.13        | D,GNAQ,CDK1,PPP2CB,GNAI3,PRKCI,RRAS2,PRKCD,E2F1,PPP2R1B                                                                                                                                                                                                                                   |
| Telomerase Signaling                           | 0.003        | 2.52        | 0.15        | NRAS,HDAC4,PIK3C2A,PPP2R5C,PPP2R5D,TERF2IP,KRAS,ELF1,PPP2CB,HSP90B1,RRAS2,E2F1,HSP90AA1,PPP2R1B,EGFF<br>PRKDC,PMAIP1,PLAGL1,PIK3C2A,MED1 (includes EG:19014),BIRC5,SCO2 (includes EG:606683),GADD45A,STAG1,BBC3,E2F1,HIPK2,PIDD,PML                                                       |
| p53 Signaling                                  | 0.004        | 2.36        | 0.15        | NRAS,RRAS2,RND3,PIK3C2A,RHOB,HMMR,ITGAV,PLAUR,KRAS,RHOF                                                                                                                                                                                                                                   |
| Glioma Invasiveness Signaling                  | 0.005        | 2.30        | 0.17        | TLR1,MSH3 (includes EG:17686),SMAD3,LRP6,MMP13,KRAS,JAK2,FZD1,BIRC5,TGFBR2,CASP9 (includes EG:100140945),RHOB,TLR3,STAT1,RHOF,PTGER4,EGFR,NRAS,GNAS,PIK3C2A,DVL1,VEGFC,TCF3,APC,FZD8,RRAS2,RND3                                                                                           |
| Colorectal Cancer Metastasis Signaling         | 0.007        | 2.15        | 0.11        | NRAS,PIK3C2A,GNAQ,PLAUR,MMP13,VEGFC,HBEGF,KRAS,MAPK13,JAK2,EIF4E,RRAS2,PTPN11,ITGAV,EGFF                                                                                                                                                                                                  |
| Role of Tissue Factor in Cancer                | 0.008        | 2.12        | 0.13        | HSP90B1,UBE2Q1,UBE2N,NQO1,HSP90AA1,UBE2E3,UBE2S,UBE2L6,UBE2D1,ATF2                                                                                                                                                                                                                        |
| Hypoxia Signaling in the Cardiovascular System | 0.011        | 1.94        | 0.15        | NPM1,CDC25C,NRAS,HDAC4,PIK3C2A,KRAS,SMARCA4,CDK1,CCNB1,RRAS2,POLR2C,GADD45A,POLR2E,E2F1,FANCA                                                                                                                                                                                             |
| Hereditary Breast Cancer Signaling             | 0.012        | 1.92        | 0.12        | RALA,PIK3C2A,SMAD3,VEGFC,HBEGF,KRAS,JAK2,BIRC5,TGFBR2,E2F6,CASP9 (includes EG:100140945),E2F1,STAT1,EGFF                                                                                                                                                                                  |
| Pancreatic Adenocarcinoma Signaling            | 0.013        | 1.87        | 0.12        | NRAS,RRAS2,RND3,PIK3C2A,PTPN11,ITGAV,EGFF                                                                                                                                                                                                                                                 |
| Telomere Extension by Telomerase               | 0.016        | 1.79        | 0.24        | TNKS,XRCC6,TERF2IP,XRCC5                                                                                                                                                                                                                                                                  |
| Prostate Cancer Signaling                      | 0.022        | 1.65        | 0.11        | CCNE2,HSP90B1,NRAS,RRAS2,CASP9 (includes EG:100140945),PIK3C2A,E2F1,NKX3-1,HSP90AA1,KRAS,ATF2                                                                                                                                                                                             |
| Chronic Myeloid Leukemia Signaling             | 0.025        | 1.60        | 0.12        | CTBP1,TGFBR2,IKBKB,E2F6,NRAS,RRAS2,HDAC4,PTPN11,PIK3C2A,SMAD3,E2F1,KRAS                                                                                                                                                                                                                   |
| Glioblastoma Multiforme Signaling              | 0.029        | 1.54        | 0.10        | NRAS,PIK3C2A,ITPR2,GNAQ,KRAS,FZD1,TCF3,APC,FZD8,E2F6,RRAS2,RHOB,RND3,PRKCD,E2F1,RHOF,EGFF                                                                                                                                                                                                 |
| PI3K/AKT Signaling                             | 0.032        | 1.50        | 0.10        | NRAS,YWHAE,PPP2R5C,PPP2R5D,KRAS,JAK2,EIF4E,PPP2CB,IKBKB,HSP90B1,RRAS2,HSP90AA1,PPP2R1B,MCL1                                                                                                                                                                                               |
| HER-2 Signaling in Breast Cancer               | 0.035        | 1.46        | 0.13        | CCNE2,PRKCI,NRAS,RRAS2,CASP9 (includes EG:100140945),PIK3C2A,PRKCD,KRAS,PRKD3,EGFR<br>PPP1CC,PAK2,NRAS,PIK3C2A,PPP2R5C,PPP2R5D,PPP1CB,KRAS,PPP1R14B,EIF4E,ATF2,ELF1,PPP2CB,LAMTOR3,PRKCI,RRAS2,PRKCD,STAT1,PPP2R1B                                                                        |
| ERK/MAPK Signaling                             | 0.049        | 1.31        | 0.09        | E2F6,GADD45A,E2F1,PLK1,BRCC3,STAT1,FANCA,SMARCA4                                                                                                                                                                                                                                          |
| Role of BRCA1 in DNA Damage Response           | 0.051        | 1.29        | 0.12        | CXCL10,NRAS,RRAS2,KRAS,NGF,TCF3                                                                                                                                                                                                                                                           |
| Thyroid Cancer Signaling                       | 0.054        | 1.27        | 0.14        | E2F6,PRKCI,NRAS,RRAS2,PIK3C2A,PRKCD,E2F1,KRAS,PRKD3,IGF2R,EGFR                                                                                                                                                                                                                            |
| Glioma Signaling                               | 0.060        | 1.22        | 0.10        |                                                                                                                                                                                                                                                                                           |
| <b>Wnt/b-catenin Signaling</b>                 | <b>0.069</b> | <b>1.16</b> | <b>0.10</b> | <b>APPL2,PPP2R5C,PPP2R5D,MARK2,DVL1,LRP6,GNAQ,FZD1,TCF3,APC,TGFBR2,CSNK1E,PPP2CB,FZD8,CSNK2A1,DKK2,PPP2R1B</b>                                                                                                                                                                            |
| Non-Small Cell Lung Cancer Signaling           | 0.076        | 1.12        | 0.10        | NRAS,RRAS2,CASP9 (includes EG:100140945),PIK3C2A,ITPR2,E2F1,KRAS,EGFR                                                                                                                                                                                                                     |
| Renal Cell Carcinoma Signaling                 | 0.106        | 0.97        | 0.11        | MET,PAK2,NRAS,RRAS2,PTPN11,PIK3C2A,KRAS,FH                                                                                                                                                                                                                                                |
| Small Cell Lung Cancer Signaling               | 0.113        | 0.95        | 0.09        | TRAF6,IKBKB,CCNE2,CASP9 (includes EG:100140945),PIK3C2A,E2F1,SKP2 (includes EG:27401),TRAF1                                                                                                                                                                                               |
| Estrogen-Dependent Breast Cancer Signaling     | 0.116        | 0.94        | 0.10        | NRAS,RRAS2,PIK3C2A,KRAS,HSD17B4,EGFR,ATF2                                                                                                                                                                                                                                                 |
| Ovarian Cancer Signaling                       | 0.121        | 0.92        | 0.09        | NRAS,PIK3C2A,DVL1,PTGS1,VEGFC,KRAS,FZD1,TCF3,APC,FZD8,RRAS2,E2F1,EGFF                                                                                                                                                                                                                     |
| Melanoma Signaling                             | 0.159        | 0.80        | 0.11        | NRAS,RRAS2,PIK3C2A,E2F1,KRAS                                                                                                                                                                                                                                                              |
| PTEN Signaling                                 | 0.240        | 0.62        | 0.08        | MAST2,TGFBR2,IKBKB,NRAS,RRAS2,CASP9 (includes EG:100140945),CSNK2A1,KRAS,IGF2R,EGFF                                                                                                                                                                                                       |
| FAK Signaling                                  | 0.247        | 0.61        | 0.08        | ARHGAP26,PAK2,NRAS,RRAS2,PIK3C2A,HMMR,KRAS,EGFR                                                                                                                                                                                                                                           |
| Endometrial Cancer Signaling                   | 0.285        | 0.55        | 0.09        | NRAS,RRAS2,CASP9 (includes EG:100140945),PIK3C2A,KRAS                                                                                                                                                                                                                                     |
| Bladder Cancer Signaling                       | 0.401        | 0.40        | 0.08        | NRAS,RRAS2,E2F1,MMP13,VEGFC,KRAS,EGFR                                                                                                                                                                                                                                                     |
| Acute Myeloid Leukemia Signaling               | 0.437        | 0.36        | 0.07        | NRAS,RRAS2,PIK3C2A,KRAS,PML,TCF3                                                                                                                                                                                                                                                          |
| Basal Cell Carcinoma Signaling                 | 0.531        | 0.28        | 0.07        | FZD8,DVL1,FZD1,TCF3,APC                                                                                                                                                                                                                                                                   |

**2. Biocarta PATHWAY ANALYSIS**

| Canonical Pathway | p value | -log(p) | Fold Enrichment | Pathway components |
|-------------------|---------|---------|-----------------|--------------------|
|-------------------|---------|---------|-----------------|--------------------|

|                                          |                |             |                    |                                                              |
|------------------------------------------|----------------|-------------|--------------------|--------------------------------------------------------------|
| Role of Ran in mitotic spindle regulatio | 0.01514        | 1.819807    | 3.665816327        | NUMA1, RAN, TPX2, RANBP1, AURKA, KPNB1                       |
| Telomeres, Cellular Aging, and Immor     | 0.02553        | 1.59293     | 2.851190476        | EGFR, XRCC5, HSP90AA1, KRAS, XRCC6, TNKS, CDKL3              |
| <b>WNT Signaling Pathway</b>             | <b>0.04048</b> | <b>1.39</b> | <b>2.370309278</b> | <b>CSNK1A1, CTBP1, CSNK2A1, BTRC, FZD1, CDKL3, DVL1, APC</b> |

### 3. KEGG PATHWAY ANALYSIS

| Canonical Pathway                                                                                                  | p value                       | -log(p)                          | Fold Enrichment                           | Pathway components                                                                                                                                                                                                                                                 |
|--------------------------------------------------------------------------------------------------------------------|-------------------------------|----------------------------------|-------------------------------------------|--------------------------------------------------------------------------------------------------------------------------------------------------------------------------------------------------------------------------------------------------------------------|
| hsa03010:Ribosome                                                                                                  | 1.99E-04                      | 3.701147                         | 2.390078195                               | RPL14, RPL13, RPL15, RPLP0P6, RPL21P28, RPL7, RPL6, RPS3A, RPLP0, RPL8, RPL3, RPL11, RPL4, RPS21, RPS23, RPL36AL, RPS10P7, RPSA, RPS9, RPL24, RPS7, RPL23, RPS16, RPL21, RPS10                                                                                     |
| hsa04142:Lysosome                                                                                                  | 0.00439                       | 2.357375                         | 1.858021161                               | ARSB, AGA, SGSH, HYAL1, NAGLU, CLTB, AP3S2, ACP2, CTSS, CLTC, CD164, CTSL1, GNS, DNASE2, CD68, LAMP3, AP3M2, GNPTAB, IGF2R, ARSA, ENTPD4, GGA2, CTSG                                                                                                               |
| hsa04114:Oocyte meiosis                                                                                            | 0.00443                       | 2.353551                         | 1.890334572                               | PPP2R1B, CDK1, BTRC, PPP2R5D, PPP2R5C, AURKA, PTTG2, PTTG1, PPP1CC, CDC25C, PPP1CB, CDC27, YWHAE, ITPR2, CCNE2, CCNB1, REC8, CCNB2, PLK1, PPP2CB, BUB1, SMC1A, FBXW11                                                                                              |
| hsa04110:Cell cycle                                                                                                | 0.00977                       | 2.010202                         | 1.739107807                               | E2F1, CDK1, CDC14A, SKP2, SMAD3, PRKDC, PTTG2, CDK7, PTTG1, CDC25C, CDC27, YWHAE, MCM4, MCM6, CCNE2, CCNB1, CCNB2, CCND3, PLK1, BUB1, SMC1A, CCNA2, GADD45A, STAG1                                                                                                 |
| hsa04115:p53 signaling pathway                                                                                     | 0.02238                       | 1.650165                         | 1.945932648                               | CDK1, LRDD, PMAIP1, GTSE1, CCNB1, CCNE2, EI24, CCNB2, CCND3, CASP9, BBC3, RRM2, CASP8, GADD45A, HLA-DQB1, HSP90AA1, HLA-A, IFI30, HLA-C, CTSS, NFYA, HLA-B, HLA-E, CANX, CTSL1, HLA-G, B2M, HLA-F, PSME1, PSME2, TAP1                                              |
| hsa04612:Antigen processing and pres<br>hsa00100:Steroid biosynthesis                                              | 0.02398<br>0.0264             | 1.6202<br>1.578336               | 1.822009226<br>3.33588454                 | CYP51A1, SQLE, DHCR7, LSS, FDFT1, SC4MOL                                                                                                                                                                                                                           |
| hsa05210:Colorectal cancer                                                                                         | 0.02648                       | 1.577037                         | 1.912838555                               | EGFR, FZD8, MSH3, APC2, MET, TGFBR2, FZD1, SMAD3, RAF1, BIRC5, RALGDS, DVL1, KRAS, CASP9, SOS2, APC, BTRC, UBE4B, UBA7, SKP2, PML, UBE2L6, HERC4, UBE3C, MID1, CDC27, UBE2Q1, UBE2N, CUL3, UBE2E3, HUWE1, UBR5, DET1, SMURF2, SMURF1, UBE2D1, TRAF6, UBE2S, FBXW11 |
| hsa04120:Ubiquitin mediated proteolys                                                                              | 0.02668                       | 1.573773                         | 1.586777196                               | HLA-DQB1, HIST2H2AA3, HIST1H2AC, HIST2H2AA4, HIST1H2AD, HIST2H4A, HIST2H4B, TROVE2, HIST1H2BK, FCGR1C, H2AFV, FCGR1A, HIST1H2BI, H2AFZ, HIST1H4C, HIST3H2A, HIST1H4H, HIST1H2BD, HIST1H2BE, HIST1H2BG, ACTN2, TRIM21, HIST1H2AI, HIST1H3D, HIST1H2AJ, CTSG         |
| hsa05322:Systemic lupus erythematos<br>hsa04621:NOD-like receptor signaling<br>hsa04623:Cytosolic DNA-sensing path | 0.02694<br>0.05499<br>0.05692 | 1.569541<br>1.259712<br>1.244725 | 1.718485975<br>1.829356038<br>1.890334572 | CASP5, NOD2, HSP90B1, NOD1, HSP90AA1, MAPK13, CASP8, RIPK2, TRAF6, IKKBK, CCL5, NLRP1, DDX58, POLR3G, IFNB1, TBK1, TREX1, IKKBK, POLR3C, CCL5, ZBP1, POLR3D, CXCL10                                                                                                |
| <b>hsa04310:Wnt signaling pathway</b>                                                                              | <b>0.06769</b>                | <b>1.169444</b>                  | <b>1.603784743</b>                        | <b>DKK2, CSNK2A1, CCND3, CSNK1E, PPP2CB, CACYBP, LRP6, WNT6, FBXW11, APC</b>                                                                                                                                                                                       |
| hsa05215:Prostate cancer                                                                                           | 0.0781                        | 1.107325                         | 1.699177144                               | E2F1, EGFR, FGFR2, HSP90AA1, MAP2K2, RAF1, CCNE2, NRAS, HSP90B1, KRAS, CASP9, SOS2, NKX3-1, MTOR, IKKBK                                                                                                                                                            |

### 4. REACTOME PATHWAY ANALYSIS

| Canonical Pathway              | p value  | -log(p) | Fold Enrichment | Pathway components                                                                                                                                                                                                                                                                                                                                                                                                                                                                 |
|--------------------------------|----------|---------|-----------------|------------------------------------------------------------------------------------------------------------------------------------------------------------------------------------------------------------------------------------------------------------------------------------------------------------------------------------------------------------------------------------------------------------------------------------------------------------------------------------|
| REACT_11061:Signalling by NGF  | 0.04466  | 1.35    | 1.433928141     | PPP2R5D, CLTC, KRAS, MYD88, CASP9, SQSTM1, PPP2CB, RALA, TRAF6, PPP2R1B, IRAK1, MAP2K2, PRKCI, NR4A1, RAF1, YWHAE, PRKCD, RALGDS, ITPR2, NRAS, DUSP3, MAPK13, PSEN2, RIPK2, RIT1, MTOR, IKKBK, NGF                                                                                                                                                                                                                                                                                 |
| REACT_152:Cell Cycle, Mitotic  | 1.61E-07 | 6.79    | 1.897528968     | E2F1, CDC14A, BTRC, PPP2R5D, PPP2R5C, PTTG2, AURKA, PTTG1, CCNE2, INCENP, PSMD1, PSMD2, RANBP2, CCNA2, STAG1, PPP2R1B, CDK1, HSP90AA1, SKP2, CDK7, PPP1CC, MCM4, MCM6, REC8, PSME1, CCND3, PSME2, RRM2, FGFR1OP, PSMB10, NUP98, NEK2, POLA1, TYMS, SPC25, NUMA1, CENPA, PPP2CB, BUB1, PAFAH1B1, CLASP1, UBE2D1, CENPN, CENPM, GINS4, ALMS1, CENPF, BIRC5, NDC80, CENPE, CDC25C, CDC27, MLF1IP, YWHAE, PSMB9, CCNB1, CCNB2, DHFR, PSMD12, CSNK1E, PSMC3, PLK1, POLD2, SMC1A, KIF20A |
| REACT_6167:Influenza Infection | 4.35E-07 | 6.36    | 2.296372637     | NBCP2, FUS, POLR2E, RPL14, RPL13, RPL15, RPLP0P6, POLR2C, YBX1, RPL21P28, HNRNPL, HNRNPA3, HNRNPK, RPL7, CD2BP2, RPL6, RPS3A, RPLP0, RPL8, HNRNPD, U2AF1, RPL3, RPL11, RPL4, RPS21, KPNB1, RPS23, RPS10P7, RPSA, RAN, PTBP1, RPS9, RPL24, HNRNPA1, HNRNPA0, RPS7, RPL23, RPS16, HNRNPUL1, RPL21, RPS10, LOC728643, HNRNPH1, SMC1A                                                                                                                                                  |

|                                     |                |             |                    |                                                                                                                                                                                                                                                                                                                                                                                                                                                                                                                                                                         |
|-------------------------------------|----------------|-------------|--------------------|-------------------------------------------------------------------------------------------------------------------------------------------------------------------------------------------------------------------------------------------------------------------------------------------------------------------------------------------------------------------------------------------------------------------------------------------------------------------------------------------------------------------------------------------------------------------------|
| REACT_71:Gene Expression            | 1.44E-06       | 5.84        | 1.751148162        | NCBP2, TARS2, RPL14, RPL13, RPL15, RPLP0P6, YBX1, WARS, GTF2E2, GTF2H2D, GTF2H2C, RPS3A, RPLP0, EIF1AX, CLP1, U2AF1, RPL11, CARS, TAF4B, PTBP1, CDK7, SARS2, GTF2H2, GTF2H2B, MED15, RPS16, SNRNP200, HARS, EEF1G, RPS10, EEF1D, MED1, FUS, POLR2E, EEF1B2, NHP2L1, WARS2, POLR2C, SF3B3, RPL21P28, HNRNPA3, HNRNPL, EIF3A, HNRNPK, RPL7, RPL6, CD2BP2, EIF3F, CDC40, RPL8, RPL3, HNRNPD, PABPC1, RPL4, RPS21, RPS23, RPS10P7, RPSA, SSRP1, AIMP1, RPS9, RPL24, HNRNPA1, HNRNPA0, RPS7, EIF4B, NOTCH2, PAPOLA, EIF4E, RPL23, HNRNPUL1, RPL21, LOC728643, HNRNPH1, SMC1A |
| REACT_1762:3' -UTR-mediated transl  | 7.17E-05       | 4.14        | 2.25331565         | RPL14, RPL13, RPL15, RPLP0P6, RPL21P28, EIF3A, RPL7, RPS3A, RPL6, EIF1AX, RPLP0, EIF3F, RPL8, RPL3, RPL11, RPL4, PABPC1, RPS21, RPS23, RPS10P7, RPSA, RPS9, RPL24, RPS7, EIF4B, EIF4E, RPL23, RPS16, RPL21, RPS10                                                                                                                                                                                                                                                                                                                                                       |
| REACT_17015:Metabolism of proteins  | 0.00108        | 2.97        | 1.661430894        | EEF1B2, RPL14, RPL13, RPL15, RPLP0P6, VBP1, CCT2, RPL21P28, EIF3A, RPL7, RPL6, RPS3A, RPLP0, EIF1AX, EIF3F, RPL8, RPL3, PIGC, RPL11, PABPC1, RPL4, RPS21, TUBA1B, RPS23, RPS10P7, RPSA, F10, RPS9, RPL24, PLAUR, RPS7, PIGN, CCT7, EIF4B, CCT5, EIF4E, RPL23, RPS16, TBCD, RPL21, EEF1G, RPS10, EEF1D                                                                                                                                                                                                                                                                   |
| REACT_125:Processing of Capped Int  | 0.00158        | 2.80        | 1.966530022        | NCBP2, FUS, POLR2E, NHP2L1, POLR2C, SF3B3, YBX1, HNRNPL, HNRNPA3, HNRNPK, CD2BP2, CLP1, CDC40, U2AF1, HNRNPD, PTBP1, HNRNPA1, HNRNPA0, PAPOLA, EIF4E, HNRNPUL1, SNRNP200, LOC728643, SMC1A, HNRNPH1                                                                                                                                                                                                                                                                                                                                                                     |
| REACT_6185:HIV Infection            | 0.00514        | 2.29        | 1.616509053        | XRCC5, PSMB10, NCBP2, NUP98, POLR2E, BTRC, XRCC6, APOBEC3G, POLR2C, APOBEC3F, B2M, AP2B1, GTF2H2D, GTF2E2, GTF2H2C, PAK2, NUP50, PSMD1, NPM1, PSMD2, RANBP1, RANBP2, KPNB1, SSRP1, SLC25A4, RAN, TAF4B, HLA-A, CDK7, GTF2H2, PSMB9, GTF2H2B, PSME1, PSMD12, PSME2, PSMC3                                                                                                                                                                                                                                                                                                |
| <b>REACT_11045:Signaling by Wnt</b> | <b>0.00541</b> | <b>2.27</b> | <b>2.222270666</b> | <b>PPP2R1B, PSMB10, CSNK1A1, BTRC, PPP2R5D, PPP2R5C, PSMB9, PSME1, PSMD12, PSMC3, PSME2, PSMD1,</b><br>HIST1H2AC, HIST2H2AA3, HIST2H2AA4, HIST1H2BD, HIST1H2BE, HIST1H2BG, HIST1H2AD, POLA1, TERF2IP, HIST2H4A, HIST2H4B, H2BFS, HIST1H2BK, HIST1H2BI, POLD2, HIST1H2AI, H2AFZ, HIST1H4C, HIST1H3D,                                                                                                                                                                                                                                                                     |
| REACT_7970:Telomere Maintenance     | 0.00656        | 2.18        | 2.25331565         | HIST1H2AJ, HIST1H4H                                                                                                                                                                                                                                                                                                                                                                                                                                                                                                                                                     |
| REACT_6844:Signaling by TGF beta    | 0.01875        | 1.73        | 3.60530504         | ZFYVE9, TGFB2, SMAD3, SMURF2, SMURF1, UBE2D1                                                                                                                                                                                                                                                                                                                                                                                                                                                                                                                            |



Supplementary Table 7. Genes differentially expressed in GBMs with low FAT1 expression (TCGA dataset).

**Wnt/ $\beta$ -catenin Signaling Components:**

APC2, CDH2, CDH5, EP300, FZD3, FZD5, FZD7, JUN, LEF1, LRP1, PPP2R3A, RARA, SOX9, TCF3, TCF4, TLE1, TP53, WIF1

| <u>Probeset</u> | <u>Fold Change (FAT1low/FAT1nl)</u> | <u>q value</u> |          | <u>Gene Description</u>                                                                      |
|-----------------|-------------------------------------|----------------|----------|----------------------------------------------------------------------------------------------|
| 201579_at       | -2.6076                             | 0              | FAT1     | FAT tumor suppressor homolog 1 (Drosophila)<br><i>*FAT1 NOT INCLUDED IN PATHWAY ANALYSIS</i> |
| 201150_s_at     | -1.66768                            | 3.21E-09       | TIMP3    | TIMP metalloproteinase inhibitor 3                                                           |
| 201148_s_at     | -1.60469                            | 4.68E-09       | TIMP3    | TIMP metalloproteinase inhibitor 3                                                           |
| 221958_s_at     | -1.38267                            | 4.35E-08       | WLS      | wntless homolog (Drosophila)                                                                 |
| 203215_s_at     | -1.37958                            | 4.35E-08       | MYO6     | myosin VI                                                                                    |
| 213395_at       | -1.69129                            | 4.82E-08       | MLC1     | megalencephalic leukoencephalopathy with subcortical cysts 1                                 |
| 201149_s_at     | -1.61473                            | 4.82E-08       | TIMP3    | TIMP metalloproteinase inhibitor 3                                                           |
| 203216_s_at     | -1.40165                            | 6.38E-08       | MYO6     | myosin VI                                                                                    |
| 218247_s_at     | -1.30421                            | 1.11E-07       | MEX3C    | mex-3 homolog C (C. elegans)                                                                 |
| 201147_s_at     | -1.65801                            | 1.30E-07       | TIMP3    | TIMP metalloproteinase inhibitor 3                                                           |
| 201145_at       | 1.25152                             | 1.30E-07       | HAX1     | HCLS1 associated protein X-1                                                                 |
| 206185_at       | 1.21465                             | 1.57E-07       | CRYBB1   | crystallin, beta B1                                                                          |
| 218938_at       | 1.24676                             | 1.57E-07       | FBXL15   | F-box and leucine-rich repeat protein 15                                                     |
| 218718_at       | -1.50037                            | 1.57E-07       | PDGFC    | platelet derived growth factor C                                                             |
| 202197_at       | -1.28326                            | 1.86E-07       | MTMR3    | myotubularin related protein 3                                                               |
| 218678_at       | -1.5805                             | 2.01E-07       | NES      | nestin                                                                                       |
| 203440_at       | -1.33064                            | 2.20E-07       | CDH2     | cadherin 2, type 1, N-cadherin (neuronal)                                                    |
| 219926_at       | 1.67157                             | 2.36E-07       | POPDC3   | popeye domain containing 3                                                                   |
| 203989_x_at     | -1.48149                            | 2.45E-07       | F2R      | coagulation factor II (thrombin) receptor                                                    |
| 218977_s_at     | 1.2707                              | 2.45E-07       | TRNAU1AP | tRNA selenocysteine 1 associated protein 1                                                   |
| 210473_s_at     | -1.41504                            | 2.45E-07       | GPR125   | G protein-coupled receptor 125                                                               |
| 205559_s_at     | -1.69931                            | 2.51E-07       | PCSK5    | proprotein convertase subtilisin/kexin type 5                                                |
| 203149_at       | -1.26205                            | 3.80E-07       | PVRL2    | poliovirus receptor-related 2 (herpesvirus entry mediator B)                                 |
| 212132_at       | -1.20368                            | 3.80E-07       | LSM14A   | LSM14A, SCD6 homolog A (S. cerevisiae)                                                       |
| 219061_s_at     | 1.30263                             | 4.98E-07       | LAGE3    | L antigen family, member 3                                                                   |
| 217814_at       | -1.21587                            | 4.98E-07       | CCDC47   | coiled-coil domain containing 47                                                             |
| 211964_at       | -1.63789                            | 5.34E-07       | COL4A2   | collagen, type IV, alpha 2                                                                   |
| 202077_at       | 1.21346                             | 5.74E-07       | NDUFAB1  | NADH dehydrogenase (ubiquinone) 1, alpha/beta subcomplex, 1, 8kDa                            |
| 200075_s_at     | 1.26686                             | 6.51E-07       | GUK1     | guanylate kinase 1                                                                           |
| 221452_s_at     | 1.34609                             | 8.22E-07       | TMEM14B  | transmembrane protein 14B                                                                    |
| 213298_at       | -1.34737                            | 9.15E-07       | NFIC     | nuclear factor I/C (CCAAT-binding transcription factor)                                      |
| 221885_at       | -1.42488                            | 1.22E-06       | DENND2A  | DENN/MADD domain containing 2A                                                               |
| 204422_s_at     | -1.34473                            | 1.30E-06       | FGF2     | fibroblast growth factor 2 (basic)                                                           |
| 218609_s_at     | 1.38189                             | 1.43E-06       | NUDT2    | nudix (nucleoside diphosphate linked moiety X)-type motif 2                                  |
| 202279_at       | 1.33127                             | 1.44E-06       | C14orf2  | chromosome 14 open reading frame 2                                                           |
| 211966_at       | -1.6098                             | 1.44E-06       | COL4A2   | collagen, type IV, alpha 2                                                                   |

|             |          |          |                   |                                                                                 |
|-------------|----------|----------|-------------------|---------------------------------------------------------------------------------|
| 213201_s_at | 1.24988  | 1.44E-06 | TNNT1             | troponin T type 1 (skeletal, slow)                                              |
| 205417_s_at | -1.26658 | 1.51E-06 | DAG1              | dystroglycan 1 (dystrophin-associated glycoprotein 1)                           |
| 217499_x_at | 1.43686  | 1.51E-06 | OR7E37P           | olfactory receptor, family 7, subfamily E, member 37 pseudogene                 |
| 208890_s_at | -1.32316 | 1.67E-06 | PLXNB2            | plexin B2                                                                       |
| 219683_at   | -1.42408 | 1.74E-06 | FZD3              | frizzled homolog 3 (Drosophila)                                                 |
| 200665_s_at | -1.20811 | 1.74E-06 | SPARC             | secreted protein, acidic, cysteine-rich (osteonectin)                           |
| 200078_s_at | 1.25126  | 1.82E-06 | ATP6V0B           | ATPase, H <sup>+</sup> transporting, lysosomal 21kDa, V0 subunit b              |
| 36612_at    | -1.29462 | 1.82E-06 | FAM168A           | family with sequence similarity 168, member A                                   |
| 220140_s_at | 1.21341  | 1.84E-06 | SNX11             | sorting nexin 11                                                                |
| 40560_at    | -1.32412 | 1.94E-06 | TBX2              | T-box 2                                                                         |
| 218775_s_at | -1.22217 | 1.94E-06 | WWC2              | WW and C2 domain containing 2                                                   |
| 212610_at   | -1.23761 | 2.03E-06 | PTPN11            | protein tyrosine phosphatase, non-receptor type 11                              |
| 214803_at   | -1.59247 | 2.03E-06 | CDH6              | cadherin 6, type 2, K-cadherin (fetal kidney)                                   |
| 218495_at   | 1.24745  | 2.04E-06 | UXT               | ubiquitously-expressed transcript                                               |
| 206375_s_at | 1.30068  | 2.06E-06 | HSPB3             | heat shock 27kDa protein 3                                                      |
| 53991_at    | -1.43062 | 2.07E-06 | DENND2A           | DENN/MADD domain containing 2A                                                  |
| 209184_s_at | -1.43467 | 2.07E-06 | IRS2              | insulin receptor substrate 2                                                    |
| 214626_s_at | -1.20573 | 2.10E-06 | GANAB             | glucosidase, alpha; neutral AB                                                  |
| 213421_x_at | 1.26365  | 2.11E-06 | PRSS3             | protease, serine, 3                                                             |
| 212412_at   | -1.28181 | 2.37E-06 | PDLIM5            | PDZ and LIM domain 5                                                            |
| 1007_s_at   | -1.28236 | 2.50E-06 | DDR1              | discoidin domain receptor tyrosine kinase 1                                     |
| 58780_s_at  | -1.26653 | 2.61E-06 | ARHGEF40          | Rho guanine nucleotide exchange factor (GEF) 40                                 |
| 41220_at    | -1.24594 | 2.87E-06 | SEPT9             | septin 9                                                                        |
| 210232_at   | 1.47046  | 2.89E-06 | CDC42             | cell division cycle 42 (GTP binding protein, 25kDa)                             |
| 201651_s_at | -1.23721 | 2.89E-06 | PACSL1            | protein kinase C and casein kinase substrate in neurons 2                       |
| 213652_at   | -1.42987 | 2.89E-06 | PCSK5             | proprotein convertase subtilisin/kexin type 5                                   |
| 205560_at   | -1.42085 | 2.97E-06 | PCSK5             | proprotein convertase subtilisin/kexin type 5                                   |
| 209249_s_at | 1.22925  | 3.95E-06 | GHITM             | growth hormone inducible transmembrane protein                                  |
| 207463_x_at | 1.24206  | 4.09E-06 | PRSS3             | protease, serine, 3                                                             |
| 213712_at   | -2.06582 | 4.09E-06 | ELOVL2            | elongation of very long chain fatty acids (FEN1/Elo2, SUR4/Elo3, yeast)-like 2  |
| 219896_at   | 1.29551  | 4.09E-06 | CALY              | calcyon neuron-specific vesicular protein                                       |
| 209023_s_at | -1.27142 | 4.09E-06 | STAG2             | stromal antigen 2                                                               |
| 202391_at   | 1.6994   | 4.09E-06 | BASP1             | brain abundant, membrane attached signal protein 1                              |
| 203441_s_at | -1.35956 | 4.22E-06 | CDH2              | cadherin 2, type 1, N-cadherin (neuronal)                                       |
| 214778_at   | -1.25997 | 4.32E-06 | MEGF8             | multiple EGF-like-domains 8                                                     |
| 200989_at   | -1.20608 | 4.47E-06 | HIF1A             | hypoxia inducible factor 1, alpha subunit (basic helix-loop-helix transcription |
| 202744_at   | -1.31178 | 4.47E-06 | SLC20A2           | solute carrier family 20 (phosphate transporter), member 2                      |
| 200601_at   | -1.22984 | 4.61E-06 | ACTN4             | actinin, alpha 4                                                                |
| 202551_s_at | -1.38621 | 4.74E-06 | CRIM1             | cysteine rich transmembrane BMP regulator 1 (chordin-like)                      |
| 202211_at   | -1.2038  | 4.74E-06 | ARFGAP3           | ADP-ribosylation factor GTPase activating protein 3                             |
| 218773_s_at | 1.2577   | 4.80E-06 | MSRB2             | methionine sulfoxide reductase B2                                               |
| 220326_s_at | -1.25784 | 5.09E-06 | ARHGEF40          | Rho guanine nucleotide exchange factor (GEF) 40                                 |
| 201226_at   | 1.25644  | 5.14E-06 | NDUFB8 /// SEC31B | NADH dehydrogenase (ubiquinone) 1 beta subcomplex, 8, 19kDa /// SEC31 homolog B |
| 211737_x_at | -1.30446 | 5.26E-06 | PTN               | pleiotrophin                                                                    |
| 215146_s_at | -1.31476 | 5.29E-06 | TTC28             | tetratricopeptide repeat domain 28                                              |
| 209859_at   | -1.48805 | 5.29E-06 | TRIM9             | tripartite motif-containing 9                                                   |

|             |          |          |                      |                                                                                  |
|-------------|----------|----------|----------------------|----------------------------------------------------------------------------------|
| 218950_at   | -1.54355 | 5.42E-06 | ARAP3                | ArfGAP with RhoGAP domain, ankyrin repeat and PH domain 3                        |
| 203031_s_at | 1.32119  | 5.94E-06 | UROS                 | uroporphyrinogen III synthase                                                    |
| 202336_s_at | -1.28084 | 5.94E-06 | PAM                  | peptidylglycine alpha-amidating monooxygenase                                    |
| 213417_at   | -1.31904 | 6.29E-06 | TBX2                 | T-box 2                                                                          |
| 217941_s_at | -1.22634 | 6.54E-06 | ERBB2IP              | erbb2 interacting protein                                                        |
| 202478_at   | -1.5535  | 7.32E-06 | TRIB2                | tribbles homolog 2 (Drosophila)                                                  |
| 204246_s_at | 1.2921   | 7.53E-06 | DCTN3                | dynactin 3 (p22)                                                                 |
| 214721_x_at | -1.39259 | 7.53E-06 | CDC42EP4             | CDC42 effector protein (Rho GTPase binding) 4                                    |
| 219746_at   | -1.32677 | 7.53E-06 | DPF3                 | D4, zinc and double PHD fingers, family 3                                        |
| 208862_s_at | -1.211   | 7.68E-06 | CTNND1               | catenin (cadherin-associated protein), delta 1                                   |
| 211980_at   | -1.56118 | 7.72E-06 | COL4A1               | collagen, type IV, alpha 1                                                       |
| 201734_at   | -1.22397 | 8.13E-06 | CLCN3                | chloride channel 3                                                               |
| 202168_at   | 1.21255  | 8.13E-06 | TAF9                 | TAF9 RNA polymerase II, TATA box binding protein (TBP)-associated factor, 32kDa  |
| 209465_x_at | -1.36076 | 8.46E-06 | PTN                  | pleiotrophin                                                                     |
| 201733_at   | -1.27174 | 8.48E-06 | CLCN3                | chloride channel 3                                                               |
| 204478_s_at | 1.23647  | 8.70E-06 | RABIF                | RAB interacting factor                                                           |
| 209233_at   | 1.27017  | 8.87E-06 | EMG1                 | EMG1 nucleolar protein homolog (S. cerevisiae)                                   |
| 209765_at   | -1.46286 | 8.87E-06 | ADAM19               | ADAM metallopeptidase domain 19                                                  |
| 203549_s_at | -1.65233 | 8.87E-06 | LPL                  | lipoprotein lipase                                                               |
| 219522_at   | -1.46024 | 8.87E-06 | FJX1                 | four jointed box 1 (Drosophila)                                                  |
| 209466_x_at | -1.33292 | 8.87E-06 | PTN                  | pleiotrophin                                                                     |
| 201662_s_at | -1.33437 | 9.07E-06 | ACSL3                | acyl-CoA synthetase long-chain family member 3                                   |
| 214290_s_at | 1.50482  | 9.07E-06 | HIST2H2AA3 /// HIST2 | histone cluster 2, H2aa3 /// histone cluster 2, H2aa4                            |
| 212027_at   | -1.30894 | 9.23E-06 | RBM25                | RNA binding motif protein 25                                                     |
| 220454_s_at | -1.33496 | 9.23E-06 | SEMA6A               | sema domain, transmembrane domain (TM), and cytoplasmic domain, (semaphorin) 6A  |
| 222101_s_at | -1.35673 | 9.71E-06 | DCHS1                | dachsous 1 (Drosophila)                                                          |
| 212958_x_at | -1.25363 | 9.71E-06 | PAM                  | peptidylglycine alpha-amidating monooxygenase                                    |
| 214006_s_at | 1.23923  | 9.71E-06 | GGCX                 | gamma-glutamyl carboxylase                                                       |
| 202815_s_at | -1.2225  | 9.71E-06 | HEXIM1               | hexamethylene bis-acetamide inducible 1                                          |
| 215836_s_at | -1.28394 | 1.00E-05 | #####                | protocadherin gamma subfamily A, 1 /// protocadherin gamma subfamily A, 10 /// p |
| 207827_x_at | 1.3552   | 1.01E-05 | SNCA                 | synuclein, alpha (non A4 component of amyloid precursor)                         |
| 218813_s_at | 1.21543  | 1.01E-05 | SH3GLB2              | SH3-domain GRB2-like endophilin B2                                               |
| 221886_at   | -1.48821 | 1.01E-05 | DENND2A              | DENN/MADD domain containing 2A                                                   |
| 45297_at    | -1.3922  | 1.03E-05 | EHD2                 | EH-domain containing 2                                                           |
| 204273_at   | -1.63994 | 1.07E-05 | EDNRB                | endothelin receptor type B                                                       |
| 208779_x_at | -1.29849 | 1.07E-05 | DDR1                 | discoidin domain receptor tyrosine kinase 1                                      |
| 207169_x_at | -1.30101 | 1.07E-05 | DDR1                 | discoidin domain receptor tyrosine kinase 1                                      |
| 214212_x_at | -1.26927 | 1.10E-05 | FERMT2               | fermitin family member 2                                                         |
| 32099_at    | -1.21585 | 1.12E-05 | SAFB2                | scaffold attachment factor B2                                                    |
| 202304_at   | -1.2358  | 1.16E-05 | FNDC3A               | fibronectin type III domain containing 3A                                        |
| 202694_at   | -1.31859 | 1.20E-05 | STK17A               | serine/threonine kinase 17a                                                      |
| 212670_at   | -1.53696 | 1.24E-05 | ELN                  | elastin                                                                          |
| 219312_s_at | -1.26289 | 1.24E-05 | ZBTB10               | zinc finger and BTB domain containing 10                                         |
| 211959_at   | -1.40869 | 1.27E-05 | IGFBP5               | insulin-like growth factor binding protein 5                                     |
| 204736_s_at | -1.34726 | 1.28E-05 | CSPG4                | chondroitin sulfate proteoglycan 4                                               |
| 202933_s_at | -1.21316 | 1.29E-05 | YES1                 | v-yes-1 Yamaguchi sarcoma viral oncogene homolog 1                               |

|             |          |          |                      |                                                                                  |
|-------------|----------|----------|----------------------|----------------------------------------------------------------------------------|
| 203548_s_at | -1.65787 | 1.31E-05 | LPL                  | lipoprotein lipase                                                               |
| 205717_x_at | -1.28369 | 1.31E-05 | #####                | protocadherin gamma subfamily A, 1 /// protocadherin gamma subfamily A, 10 /// p |
| 202660_at   | -1.3428  | 1.33E-05 | ITPR2                | inositol 1,4,5-triphosphate receptor, type 2                                     |
| 218131_s_at | -1.21677 | 1.33E-05 | GATAD2A              | GATA zinc finger domain containing 2A                                            |
| 212507_at   | -1.22176 | 1.34E-05 | TMEM131              | transmembrane protein 131                                                        |
| 215005_at   | 1.25275  | 1.36E-05 | NECAB2               | N-terminal EF-hand calcium binding protein 2                                     |
| 213262_at   | -1.33768 | 1.36E-05 | SACS                 | spastic ataxia of Charlevoix-Saguenay (sacsin)                                   |
| 213194_at   | -1.34427 | 1.36E-05 | ROBO1                | roundabout, axon guidance receptor, homolog 1 (Drosophila)                       |
| 221870_at   | -1.3545  | 1.37E-05 | EHD2                 | EH-domain containing 2                                                           |
| 202221_s_at | -1.22808 | 1.38E-05 | EP300                | E1A binding protein p300                                                         |
| 212764_at   | -1.27651 | 1.40E-05 | ZEB1                 | zinc finger E-box binding homeobox 1                                             |
| 209210_s_at | -1.26641 | 1.41E-05 | FERMT2               | fermitin family member 2                                                         |
| 218280_x_at | 1.48418  | 1.46E-05 | HIST2H2AA3 /// HIST2 | histone cluster 2, H2aa3 /// histone cluster 2, H2aa4                            |
| 201534_s_at | -1.21131 | 1.46E-05 | UBL3                 | ubiquitin-like 3                                                                 |
| 200771_at   | -1.30552 | 1.46E-05 | LAMC1                | laminin, gamma 1 (formerly LAMB2)                                                |
| 211981_at   | -1.58824 | 1.47E-05 | COL4A1               | collagen, type IV, alpha 1                                                       |
| 201206_s_at | -1.34052 | 1.47E-05 | RRBP1                | ribosome binding protein 1 homolog 180kDa (dog)                                  |
| 214230_at   | 1.45166  | 1.47E-05 | CDC42                | cell division cycle 42 (GTP binding protein, 25kDa)                              |
| 201910_at   | -1.28052 | 1.48E-05 | FARP1                | FERM, RhoGEF (ARHGEF) and pleckstrin domain protein 1 (chondrocyte-derived)      |
| 200952_s_at | -1.54819 | 1.55E-05 | CCND2                | cyclin D2                                                                        |
| 209185_s_at | -1.32578 | 1.56E-05 | IRS2                 | insulin receptor substrate 2                                                     |
| 55583_at    | -1.21387 | 1.68E-05 | DOCK6                | dedicator of cytokinesis 6                                                       |
| 213273_at   | -1.45306 | 1.68E-05 | ODZ4                 | odz, odd Oz/ten-m homolog 4 (Drosophila)                                         |
| 214044_at   | 1.28094  | 1.68E-05 | RYR2                 | ryanodine receptor 2 (cardiac)                                                   |
| 204247_s_at | 1.23097  | 1.68E-05 | CDK5                 | cyclin-dependent kinase 5                                                        |
| 220301_at   | -1.4061  | 1.73E-05 | CCDC102B             | coiled-coil domain containing 102B                                               |
| 217848_s_at | 1.22333  | 1.73E-05 | PPA1                 | pyrophosphatase (inorganic) 1                                                    |
| 205880_at   | -1.29751 | 1.74E-05 | PRKD1                | protein kinase D1                                                                |
| 202822_at   | -1.27227 | 1.75E-05 | LPP                  | LIM domain containing preferred translocation partner in lipoma                  |
| 203342_at   | 1.21498  | 1.75E-05 | TIMM17B              | translocase of inner mitochondrial membrane 17 homolog B (yeast)                 |
| 206118_at   | 1.26402  | 1.80E-05 | STAT4                | signal transducer and activator of transcription 4                               |
| 206384_at   | 1.29198  | 1.80E-05 | CACNG3               | calcium channel, voltage-dependent, gamma subunit 3                              |
| 205546_s_at | -1.2219  | 1.83E-05 | TYK2                 | tyrosine kinase 2                                                                |
| 204228_at   | 1.2296   | 1.83E-05 | PPIH                 | peptidylprolyl isomerase H (cyclophilin H)                                       |
| 211958_at   | -1.56317 | 1.91E-05 | IGFBP5               | insulin-like growth factor binding protein 5                                     |
| 216264_s_at | -1.31674 | 1.91E-05 | LAMB2                | laminin, beta 2 (laminin S)                                                      |
| 206376_at   | 1.26607  | 1.92E-05 | SLC6A15              | solute carrier family 6 (neutral amino acid transporter), member 15              |
| 221689_s_at | 1.22489  | 1.97E-05 | PIGP                 | phosphatidylinositol glycan anchor biosynthesis, class P                         |
| 208320_at   | 1.21972  | 1.97E-05 | CABP1                | calcium binding protein 1                                                        |
| 201470_at   | 1.27834  | 2.12E-05 | GSTO1                | glutathione S-transferase omega 1                                                |
| 211136_s_at | -1.26215 | 2.14E-05 | CLPTM1               | cleft lip and palate associated transmembrane protein 1                          |
| 201911_s_at | -1.26175 | 2.15E-05 | FARP1                | FERM, RhoGEF (ARHGEF) and pleckstrin domain protein 1 (chondrocyte-derived)      |
| 210315_at   | 1.20071  | 2.26E-05 | SYN2                 | synapsin II                                                                      |
| 214023_x_at | -1.26513 | 2.26E-05 | TUBB2B               | tubulin, beta 2B                                                                 |
| 203243_s_at | -1.32225 | 2.27E-05 | PDLIM5               | PDZ and LIM domain 5                                                             |
| 208657_s_at | -1.25155 | 2.30E-05 | 41161                | septin 9                                                                         |

|             |          |          |                                                                                                         |
|-------------|----------|----------|---------------------------------------------------------------------------------------------------------|
| 203274_at   | 1.23111  | 2.30E-05 | F8A1 /// F8A2 /// F8A: coagulation factor VIII-associated (intronic transcript) 1 /// coagulation facto |
| 210749_x_at | -1.28277 | 2.32E-05 | DDR1 discoidin domain receptor tyrosine kinase 1                                                        |
| 201661_s_at | -1.29909 | 2.32E-05 | ACSL3 acyl-CoA synthetase long-chain family member 3                                                    |
| 211066_x_at | -1.25407 | 2.36E-05 | ##### protocadherin gamma subfamily A, 1 /// protocadherin gamma subfamily A, 10 /// p                  |
| 203044_at   | -1.25201 | 2.36E-05 | CHSY1 chondroitin sulfate synthase 1                                                                    |
| 200785_s_at | -1.34051 | 2.36E-05 | LRP1 low density lipoprotein receptor-related protein 1                                                 |
| 205523_at   | -1.53152 | 2.39E-05 | HAPLN1 hyaluronan and proteoglycan link protein 1                                                       |
| 212544_at   | 1.23403  | 2.43E-05 | ZNHIT3 zinc finger, HIT-type containing 3                                                               |
| 201307_at   | -1.20908 | 2.46E-05 | 41163 septin 11                                                                                         |
| 212099_at   | -1.25581 | 2.48E-05 | RHOB ras homolog gene family, member B                                                                  |
| 209079_x_at | -1.27304 | 2.48E-05 | ##### protocadherin gamma subfamily A, 1 /// protocadherin gamma subfamily A, 10 /// p                  |
| 202350_s_at | -1.56167 | 2.54E-05 | MATN2 matrilin 2                                                                                        |
| 202427_s_at | 1.22003  | 2.57E-05 | BRP44 brain protein 44                                                                                  |
| 222010_at   | 1.21662  | 2.64E-05 | TCP1 t-complex 1                                                                                        |
| 221270_s_at | -1.21624 | 2.64E-05 | QTRT1 queuine tRNA-ribosyltransferase 1                                                                 |
| 203238_s_at | -1.26493 | 2.64E-05 | NOTCH3 notch 3                                                                                          |
| 201962_s_at | 1.29021  | 2.65E-05 | RNF41 ring finger protein 41                                                                            |
| 218354_at   | 1.22505  | 2.71E-05 | TRAPPC2L trafficking protein particle complex 2-like                                                    |
| 201203_s_at | -1.21197 | 2.76E-05 | RRBP1 ribosome binding protein 1 homolog 180kDa (dog)                                                   |
| 214620_x_at | -1.22965 | 2.76E-05 | PAM peptidylglycine alpha-amidating monooxygenase                                                       |
| 219594_at   | 1.41317  | 2.76E-05 | NINJ2 ninjurin 2                                                                                        |
| 203616_at   | 1.24277  | 2.79E-05 | POLB polymerase (DNA directed), beta                                                                    |
| 212357_at   | -1.28314 | 2.79E-05 | FAM168A family with sequence similarity 168, member A                                                   |
| 219557_s_at | 1.45952  | 2.79E-05 | NRIP3 nuclear receptor interacting protein 3                                                            |
| 220617_s_at | -1.30542 | 2.79E-05 | ZNF532 zinc finger protein 532                                                                          |
| 202202_s_at | -1.45791 | 2.86E-05 | LAMA4 laminin, alpha 4                                                                                  |
| 212242_at   | 1.3645   | 2.97E-05 | TUBA4A tubulin, alpha 4a                                                                                |
| 213787_s_at | 1.2962   | 2.99E-05 | EBP emopamil binding protein (sterol isomerase)                                                         |
| 201660_at   | -1.27094 | 3.00E-05 | ACSL3 acyl-CoA synthetase long-chain family member 3                                                    |
| 209064_x_at | 1.39525  | 3.10E-05 | PAIP1 poly(A) binding protein interacting protein 1                                                     |
| 37408_at    | -1.45265 | 3.10E-05 | MRC2 mannose receptor, C type 2                                                                         |
| 202552_s_at | -1.29479 | 3.20E-05 | CRIM1 cysteine rich transmembrane BMP regulator 1 (chordin-like)                                        |
| 205893_at   | -1.34386 | 3.23E-05 | NLGN1 neuroligin 1                                                                                      |
| 208813_at   | 1.25527  | 3.37E-05 | GOT1 glutamic-oxaloacetic transaminase 1, soluble (aspartate aminotransferase 1)                        |
| 221729_at   | -1.55717 | 3.45E-05 | COL5A2 collagen, type V, alpha 2                                                                        |
| 219416_at   | -1.31295 | 3.46E-05 | SCARA3 scavenger receptor class A, member 3                                                             |
| 214075_at   | 1.23297  | 3.47E-05 | NENF neuron derived neurotrophic factor                                                                 |
| 202561_at   | -1.25748 | 3.57E-05 | TNKS tankyrase, TRF1-interacting ankyrin-related ADP-ribose polymerase                                  |
| 205888_s_at | -1.24733 | 3.82E-05 | JAKMIP2 janus kinase and microtubule interacting protein 2                                              |
| 213158_at   | -1.33502 | 3.86E-05 | ---                                                                                                     |
| 202066_at   | -1.21639 | 3.91E-05 | PPFIA1 protein tyrosine phosphatase, receptor type, f polypeptide (PTPRF), interacting                  |
| 205532_s_at | -1.39975 | 3.93E-05 | CDH6 cadherin 6, type 2, K-cadherin (fetal kidney)                                                      |
| 207358_x_at | -1.21652 | 3.93E-05 | MACF1 microtubule-actin crosslinking factor 1                                                           |
| 207671_s_at | 1.24846  | 3.96E-05 | BEST1 bestrophin 1                                                                                      |
| 202065_s_at | -1.23034 | 4.00E-05 | PPFIA1 protein tyrosine phosphatase, receptor type, f polypeptide (PTPRF), interacting                  |
| 213058_at   | -1.31489 | 4.01E-05 | TTC28 tetratricopeptide repeat domain 28                                                                |

|             |          |          |                   |                                                                                   |
|-------------|----------|----------|-------------------|-----------------------------------------------------------------------------------|
| 211616_s_at | 1.27978  | 4.01E-05 | HTR2A             | 5-hydroxytryptamine (serotonin) receptor 2A                                       |
| 222237_s_at | -1.27633 | 4.01E-05 | ZFP112            | zinc finger protein 112 homolog (mouse)                                           |
| 205562_at   | 1.2032   | 4.03E-05 | RPP38             | ribonuclease P/MRP 38kDa subunit                                                  |
| 215416_s_at | 1.2515   | 4.20E-05 | STOML2            | stomatin (EPB72)-like 2                                                           |
| 202935_s_at | -1.38747 | 4.22E-05 | SOX9              | SRY (sex determining region Y)-box 9                                              |
| 204078_at   | -1.23159 | 4.26E-05 | LEPREL4           | leprecan-like 4                                                                   |
| 209651_at   | -1.33096 | 4.35E-05 | TGFB111           | transforming growth factor beta 1 induced transcript 1                            |
| 206888_s_at | 1.25704  | 4.35E-05 | ARHGDIG           | Rho GDP dissociation inhibitor (GDI) gamma                                        |
| 200953_s_at | -1.46206 | 4.38E-05 | CCND2             | cyclin D2                                                                         |
| 218062_x_at | -1.34248 | 4.45E-05 | CDC42EP4          | CDC42 effector protein (Rho GTPase binding) 4                                     |
| 209507_at   | 1.27655  | 4.46E-05 | RPA3              | replication protein A3, 14kDa                                                     |
| 207760_s_at | -1.23922 | 4.53E-05 | NCOR2             | nuclear receptor corepressor 2                                                    |
| 205428_s_at | 1.38263  | 4.62E-05 | CALB2             | calbindin 2                                                                       |
| 205227_at   | -1.54715 | 4.68E-05 | IL1RAP            | interleukin 1 receptor accessory protein                                          |
| 204521_at   | 1.23732  | 4.80E-05 | C12orf24          | chromosome 12 open reading frame 24                                               |
| 204363_at   | -1.41925 | 4.84E-05 | F3                | coagulation factor III (thromboplastin, tissue factor)                            |
| 204675_at   | 1.3128   | 5.17E-05 | SRD5A1            | steroid-5-alpha-reductase, alpha polypeptide 1 (3-oxo-5 alpha-steroid delta 4-de  |
| 219737_s_at | -1.44979 | 5.21E-05 | PCDH9             | protocadherin 9                                                                   |
| 203426_s_at | -1.34796 | 5.22E-05 | IGFBP5            | insulin-like growth factor binding protein 5                                      |
| 219831_at   | 1.21118  | 5.24E-05 | CDKL3             | cyclin-dependent kinase-like 3                                                    |
| 208828_at   | 1.2484   | 5.25E-05 | POLE3             | polymerase (DNA directed), epsilon 3 (p17 subunit)                                |
| 204311_at   | -1.48212 | 5.25E-05 | ATP1B2            | ATPase, Na <sup>+</sup> /K <sup>+</sup> transporting, beta 2 polypeptide          |
| 204591_at   | -1.65838 | 5.25E-05 | CHL1              | cell adhesion molecule with homology to L1CAM (close homolog of L1)               |
| 218656_s_at | -1.30489 | 5.26E-05 | LHFP              | lipoma HMGIC fusion partner                                                       |
| 214198_s_at | -1.2186  | 5.26E-05 | DGCR2             | DiGeorge syndrome critical region gene 2                                          |
| 215241_at   | 1.29254  | 5.26E-05 | ANO3              | anoctamin 3                                                                       |
| 204836_at   | -1.43838 | 5.57E-05 | GLDC              | glycine dehydrogenase (decarboxylating)                                           |
| 216804_s_at | -1.36723 | 5.57E-05 | PDLIM5            | PDZ and LIM domain 5                                                              |
| 209282_at   | -1.2057  | 5.57E-05 | PRKD2             | protein kinase D2                                                                 |
| 219714_s_at | 1.2991   | 5.57E-05 | CACNA2D3          | calcium channel, voltage-dependent, alpha 2/delta subunit 3                       |
| 202479_s_at | -1.48944 | 5.64E-05 | TRIB2             | tribbles homolog 2 (Drosophila)                                                   |
| 212295_s_at | -1.24112 | 5.71E-05 | SLC7A1            | solute carrier family 7 (cationic amino acid transporter, gamma system), member 1 |
| 208321_s_at | 1.26934  | 5.71E-05 | CABP1             | calcium binding protein 1                                                         |
| 210852_s_at | -1.22254 | 5.77E-05 | AASS              | amino adipate-semialdehyde synthase                                               |
| 213051_at   | -1.22403 | 5.77E-05 | ZC3HAV1           | zinc finger CCCH-type, antiviral 1                                                |
| 209529_at   | 1.23976  | 5.77E-05 | PPAP2C            | phosphatidic acid phosphatase type 2C                                             |
| 205645_at   | 1.2296   | 6.00E-05 | REPS2             | RALBP1 associated Eps domain containing 2                                         |
| 219477_s_at | -1.29045 | 6.21E-05 | THSD1 /// THSD1P1 | thrombospondin, type I, domain containing 1 /// thrombospondin, type I, domain c  |
| 205196_s_at | 1.2645   | 6.31E-05 | AP1S1             | adaptor-related protein complex 1, sigma 1 subunit                                |
| 210150_s_at | -1.26766 | 6.44E-05 | LAMA5             | laminin, alpha 5                                                                  |
| 212285_s_at | -1.22486 | 6.49E-05 | AGRN              | agrin                                                                             |
| 203221_at   | -1.29461 | 6.53E-05 | TLE1              | transducin-like enhancer of split 1 (E(sp1) homolog, Drosophila)                  |
| 220994_s_at | 1.26051  | 6.78E-05 | STXBP6            | syntaxin binding protein 6 (amisyn)                                               |
| 219933_at   | 1.20876  | 6.82E-05 | GLRX2             | glutaredoxin 2                                                                    |
| 220029_at   | -1.5429  | 6.83E-05 | ELOVL2            | elongation of very long chain fatty acids (FEN1/Elo2, SUR4/Elo3, yeast)-like 2    |
| 202381_at   | -1.26318 | 6.85E-05 | ADAM9             | ADAM metalloproteinase domain 9                                                   |

|             |          |             |          |                                                                                  |
|-------------|----------|-------------|----------|----------------------------------------------------------------------------------|
| 205899_at   | 1.31254  | 6.85E-05    | CCNA1    | cyclin A1                                                                        |
| 208643_s_at | 1.2066   | 6.95E-05    | XRCC5    | X-ray repair complementing defective repair in Chinese hamster cells 5 (double-s |
| 206013_s_at | 1.38688  | 7.20E-05    | ACTL6B   | actin-like 6B                                                                    |
| 221974_at   | -1.34034 | 7.21E-05    | IPW      | imprinted in Prader-Willi syndrome (non-protein coding)                          |
| 202936_s_at | -1.33413 | 7.25E-05    | SOX9     | SRY (sex determining region Y)-box 9                                             |
| 213746_s_at | -1.32316 | 7.39E-05    | FLNA     | filamin A, alpha                                                                 |
| 200811_at   | -1.22283 | 7.47E-05    | CIRBP    | cold inducible RNA binding protein                                               |
| 209711_at   | -1.25679 | 7.93E-05    | SLC35D1  | solute carrier family 35 (UDP-glucuronic acid/UDP-N-acetylgalactosamine dual tra |
| 214436_at   | 1.3254   | 7.93E-05    | FBXL2    | F-box and leucine-rich repeat protein 2                                          |
| 203222_s_at | -1.31106 | 8.04E-05    | TLE1     | transducin-like enhancer of split 1 (E(sp1) homolog, Drosophila)                 |
| 201324_at   | -1.38561 | 8.12E-05    | EMP1     | epithelial membrane protein 1                                                    |
| 213428_s_at | -1.43059 | 8.21E-05    | COL6A1   | collagen, type VI, alpha 1                                                       |
| 201645_at   | -1.4561  | 8.39E-05    | TNC      | tenascin C                                                                       |
| 219143_s_at | 1.20261  | 8.46E-05    | RPP25    | ribonuclease P/MRP 25kDa subunit                                                 |
| 208407_s_at | -1.25697 | 8.46E-05    | CTNND1   | catenin (cadherin-associated protein), delta 1                                   |
| 564_at      | -1.20108 | 8.46E-05    | GNA11    | guanine nucleotide binding protein (G protein), alpha 11 (Gq class)              |
| 205572_at   | -1.49953 | 8.46E-05    | ANGPT2   | angiopoietin 2                                                                   |
| 204541_at   | -1.28608 | 8.47E-05    | SEC14L2  | SEC14-like 2 (S. cerevisiae)                                                     |
| 202084_s_at | -1.30138 | 8.49E-05    | SEC14L1  | SEC14-like 1 (S. cerevisiae)                                                     |
| 200050_at   | -1.22214 | 8.49E-05    | ZNF146   | zinc finger protein 146                                                          |
| 43544_at    | -1.21699 | 8.50E-05    | MED16    | mediator complex subunit 16                                                      |
| 217427_s_at | -1.22176 | 8.72E-05    | HIRA     | HIR histone cell cycle regulation defective homolog A (S. cerevisiae)            |
| 202082_s_at | -1.28298 | 8.72E-05    | SEC14L1  | SEC14-like 1 (S. cerevisiae)                                                     |
| 200784_s_at | -1.28281 | 8.72E-05    | LRP1     | low density lipoprotein receptor-related protein 1                               |
| 205437_at   | -1.28731 | 8.76E-05    | ZNF211   | zinc finger protein 211                                                          |
| 204867_at   | 1.24047  | 8.80E-05    | GCHFR    | GTP cyclohydrolase I feedback regulator                                          |
| 201204_s_at | -1.28203 | 8.80E-05    | RRBP1    | ribosome binding protein 1 homolog 180kDa (dog)                                  |
| 200907_s_at | -1.22365 | 8.96E-05    | PALLD    | palladin, cytoskeletal associated protein                                        |
| 202854_at   | 1.30609  | 8.99E-05    | HPRT1    | hypoxanthine phosphoribosyltransferase 1                                         |
| 213744_at   | 1.26554  | 8.99E-05    | ATRNL1   | attractin-like 1                                                                 |
| 208398_s_at | 1.27824  | 8.99E-05    | TBPL1    | TBP-like 1                                                                       |
| 204218_at   | 1.22609  | 9.12E-05    | C11orf51 | chromosome 11 open reading frame 51                                              |
| 205733_at   | -1.37615 | 9.20E-05    | BLM      | Bloom syndrome, RecQ helicase-like                                               |
| 219249_s_at | -1.24623 | 9.20E-05    | FKBP10   | FK506 binding protein 10, 65 kDa                                                 |
| 209449_at   | 1.23823  | 9.29E-05    | LSM2     | LSM2 homolog, U6 small nuclear RNA associated (S. cerevisiae)                    |
| 217419_x_at | -1.20986 | 9.40E-05    | AGRN     | agrin                                                                            |
| 218394_at   | 1.2536   | 9.40E-05    | ROGDI    | rogdi homolog (Drosophila)                                                       |
| 203474_at   | -1.33085 | 9.59E-05    | IQGAP2   | IQ motif containing GTPase activating protein 2                                  |
| 213169_at   | -1.42429 | 9.92E-05    | SEMA5A   | sema domain, seven thrombospondin repeats (type 1 and type 1-like), transmembran |
| 204944_at   | -1.27    | 9.92E-05    | PTPRG    | protein tyrosine phosphatase, receptor type, G                                   |
| 209022_at   | -1.22091 | 9.94E-05    | STAG2    | stromal antigen 2                                                                |
| 201655_s_at | -1.2873  | 0.000101478 | HSPG2    | heparan sulfate proteoglycan 2                                                   |
| 213155_at   | -1.55448 | 0.000101478 | WSCD1    | WSC domain containing 1                                                          |
| 212813_at   | -1.20131 | 0.000102475 | JAM3     | junctional adhesion molecule 3                                                   |
| 213795_s_at | -1.21229 | 0.000104554 | PTPRA    | protein tyrosine phosphatase, receptor type, A                                   |
| 213618_at   | -1.39487 | 0.000104874 | ARAP2    | ArfGAP with RhoGAP domain, ankyrin repeat and PH domain 2                        |

|             |          |             |                       |                                                                                   |
|-------------|----------|-------------|-----------------------|-----------------------------------------------------------------------------------|
| 204557_s_at | -1.29943 | 0.000106275 | DZIP1                 | DAZ interacting protein 1                                                         |
| 217297_s_at | -1.21156 | 0.000107422 | MYO9B                 | myosin IXB                                                                        |
| 211494_s_at | -1.56545 | 0.000107422 | SLC4A4                | solute carrier family 4, sodium bicarbonate cotransporter, member 4               |
| 90265_at    | 1.27862  | 0.000107422 | ADAP1                 | ArfGAP with dual PH domains 1                                                     |
| 209099_x_at | -1.31486 | 0.00010874  | JAG1                  | jagged 1                                                                          |
| 219212_at   | 1.22346  | 0.000112215 | HSPA14                | heat shock 70kDa protein 14                                                       |
| 215259_s_at | -1.2672  | 0.000112215 | CADM4                 | cell adhesion molecule 4                                                          |
| 213469_at   | -1.31556 | 0.000112215 | PGAP1                 | post-GPI attachment to proteins 1                                                 |
| 41577_at    | 1.37797  | 0.000113812 | PPP1R16B              | protein phosphatase 1, regulatory (inhibitor) subunit 16B                         |
| 210292_s_at | 1.59467  | 0.000114556 | PCDH11X /// PCDH11    | protocadherin 11 X-linked /// protocadherin 11 Y-linked                           |
| 204467_s_at | 1.41863  | 0.000117433 | SNCA                  | synuclein, alpha (non A4 component of amyloid precursor)                          |
| 210408_s_at | 1.20212  | 0.000117666 | CPNE6                 | copine VI (neuronal)                                                              |
| 216268_s_at | -1.33082 | 0.000118327 | JAG1                  | jagged 1                                                                          |
| 208741_at   | -1.21501 | 0.000121481 | SAP18                 | Sin3A-associated protein, 18kDa                                                   |
| 202506_at   | -1.2211  | 0.000123801 | SSFA2                 | sperm specific antigen 2                                                          |
| 219671_at   | 1.50453  | 0.000125586 | HPCAL4                | hippocalcin like 4                                                                |
| 201412_at   | -1.22562 | 0.000126658 | LRP10                 | low density lipoprotein receptor-related protein 10                               |
| 202647_s_at | 1.26894  | 0.000127064 | NRAS                  | neuroblastoma RAS viral (v-ras) oncogene homolog                                  |
| 214752_x_at | -1.28462 | 0.000127064 | FLNA                  | filamin A, alpha                                                                  |
| 211934_x_at | -1.20667 | 0.00012788  | GANAB                 | glucosidase, alpha; neutral AB                                                    |
| 214297_at   | -1.37921 | 0.000129435 | CSPG4                 | chondroitin sulfate proteoglycan 4                                                |
| 220316_at   | -1.39701 | 0.000130374 | NPAS3                 | neuronal PAS domain protein 3                                                     |
| 209202_s_at | -1.2242  | 0.000131005 | EXTL3                 | exostoses (multiple)-like 3                                                       |
| 205334_at   | 1.43284  | 0.000131005 | S100A1                | S100 calcium binding protein A1                                                   |
| 202175_at   | -1.21613 | 0.000134735 | CHPF                  | chondroitin polymerizing factor                                                   |
| 208612_at   | -1.20839 | 0.000134735 | PDIA3                 | protein disulfide isomerase family A, member 3                                    |
| 209633_at   | 1.21862  | 0.000137291 | PPP2R3A               | protein phosphatase 2, regulatory subunit B'', alpha                              |
| 205827_at   | 1.62691  | 0.00013836  | CCK                   | cholecystokinin                                                                   |
| 210809_s_at | -2.63317 | 0.000138732 | POSTN                 | periostin, osteoblast specific factor                                             |
| 202756_s_at | -1.3478  | 0.000138759 | GPC1                  | glypican 1                                                                        |
| 219162_s_at | 1.20357  | 0.000139242 | MRPL11                | mitochondrial ribosomal protein L11                                               |
| 218069_at   | 1.21555  | 0.000139936 | DCTPP1                | dCTP pyrophosphatase 1                                                            |
| 211836_s_at | 1.61529  | 0.00014085  | MOG                   | myelin oligodendrocyte glycoprotein                                               |
| 202223_at   | -1.20142 | 0.000144948 | STT3A                 | STT3, subunit of the oligosaccharyltransferase complex, homolog A (S. cerevisiae) |
| 214098_at   | 1.39929  | 0.000144948 | KIAA1107              | KIAA1107                                                                          |
| 218064_s_at | -1.22091 | 0.000145312 | AKAP8L                | A kinase (PRKA) anchor protein 8-like                                             |
| 203143_s_at | -1.32268 | 0.000146674 | KIAA0040              | KIAA0040                                                                          |
| 212909_at   | -1.43333 | 0.000147373 | LYPD1                 | LY6/PLAUR domain containing 1                                                     |
| 202007_at   | -1.38657 | 0.000147609 | NID1                  | nidogen 1                                                                         |
| 212165_at   | 1.22036  | 0.000147909 | TMEM183A /// TMEM183B | transmembrane protein 183A /// transmembrane protein 183B                         |
| 203749_s_at | -1.20985 | 0.000148271 | RARA                  | retinoic acid receptor, alpha                                                     |
| 208051_s_at | 1.36721  | 0.000149881 | PAIP1                 | poly(A) binding protein interacting protein 1                                     |
| 218048_at   | 1.20822  | 0.000150234 | COMMMD3               | COMM domain containing 3                                                          |
| 213938_at   | 1.42835  | 0.000152296 | ERC2                  | ELKS/RAB6-interacting/CAST family member 2                                        |
| 219888_at   | 1.38337  | 0.000152296 | SPAG4                 | sperm associated antigen 4                                                        |
| 208986_at   | -1.21452 | 0.000152422 | TCF12                 | transcription factor 12                                                           |



|             |          |             |                       |                                                                                  |
|-------------|----------|-------------|-----------------------|----------------------------------------------------------------------------------|
| 203897_at   | 1.21646  | 0.000152422 | LYRM1                 | LYR motif containing 1                                                           |
| 202898_at   | -1.31628 | 0.000152422 | SDC3                  | syndecan 3                                                                       |
| 221893_s_at | 1.21932  | 0.000152898 | ADCK2                 | aarF domain containing kinase 2                                                  |
| 222266_at   | -1.23484 | 0.000154435 | C19orf2               | Chromosome 19 open reading frame 2                                               |
| 221245_s_at | -1.39981 | 0.000154675 | FZD5                  | frizzled homolog 5 (Drosophila)                                                  |
| 200859_x_at | -1.29502 | 0.000156648 | FLNA                  | filamin A, alpha                                                                 |
| 207107_at   | -1.48464 | 0.000163302 | RPE65                 | retinal pigment epithelium-specific protein 65kDa                                |
| 204844_at   | -1.29669 | 0.000163407 | ENPEP                 | glutamyl aminopeptidase (aminopeptidase A)                                       |
| 215028_at   | -1.42147 | 0.000167039 | SEMA6A                | sema domain, transmembrane domain (TM), and cytoplasmic domain, (semaphorin) 6A  |
| 215127_s_at | -1.27851 | 0.000168885 | RBMS1                 | RNA binding motif, single stranded interacting protein 1                         |
| 206929_s_at | -1.26732 | 0.000168885 | NFIC                  | nuclear factor I/C (CCAAT-binding transcription factor)                          |
| 218686_s_at | -1.26896 | 0.000168885 | RHBDF1                | rhomboid 5 homolog 1 (Drosophila)                                                |
| 213904_at   | 1.57834  | 0.000169619 | ---                   | ---                                                                              |
| 201578_at   | -1.27312 | 0.000169619 | PODXL                 | podocalyxin-like                                                                 |
| 218469_at   | 1.34575  | 0.000169619 | GREM1                 | gremlin 1                                                                        |
| 204520_x_at | -1.20385 | 0.000169619 | BRD1                  | bromodomain containing 1                                                         |
| 205116_at   | -1.34785 | 0.00017053  | LAMA2                 | laminin, alpha 2                                                                 |
| 208704_x_at | -1.20252 | 0.000173647 | APLP2                 | amyloid beta (A4) precursor-like protein 2                                       |
| 209080_x_at | 1.26326  | 0.000179689 | GLRX3                 | glutaredoxin 3                                                                   |
| 214428_x_at | -1.41224 | 0.00018292  | C4A /// C4B /// LOC10 | complement component 4A (Rodgers blood group) /// complement component 4B (Chido |
| 221794_at   | -1.21527 | 0.00018292  | DOCK6                 | dedicator of cytokinesis 6                                                       |
| 210480_s_at | -1.26606 | 0.000188114 | MYO6                  | myosin VI                                                                        |
| 200951_s_at | -1.51185 | 0.000188261 | CCND2                 | cyclin D2                                                                        |
| 214469_at   | 1.25774  | 0.000188261 | HIST1H2AE             | histone cluster 1, H2ae                                                          |
| 204729_s_at | 1.23099  | 0.000189033 | STX1A                 | syntaxin 1A (brain)                                                              |
| 201013_s_at | -1.20054 | 0.000194643 | PAICS                 | phosphoribosylaminoimidazole carboxylase, phosphoribosylaminoimidazole succinoca |
| 218087_s_at | -1.29523 | 0.000195947 | SORBS1                | sorbin and SH3 domain containing 1                                               |
| 205348_s_at | 1.52843  | 0.000199703 | DYNC111               | dynein, cytoplasmic 1, intermediate chain 1                                      |
| 218093_s_at | -1.27362 | 0.000201059 | ANKRD10               | ankyrin repeat domain 10                                                         |
| 208998_at   | 1.34505  | 0.000205122 | UCP2                  | uncoupling protein 2 (mitochondrial, proton carrier)                             |
| 201785_at   | 1.50198  | 0.000205433 | RNASE1                | ribonuclease, RNase A family, 1 (pancreatic)                                     |
| 213519_s_at | -1.43575 | 0.000207186 | LAMA2                 | laminin, alpha 2                                                                 |
| 204730_at   | 1.45267  | 0.000209077 | RIMS3                 | regulating synaptic membrane exocytosis 3                                        |
| 206039_at   | 1.57863  | 0.000209927 | RAB33A                | RAB33A, member RAS oncogene family                                               |
| 205454_at   | 1.37935  | 0.000210401 | HPCA                  | hippocalcin                                                                      |
| 214574_x_at | 1.34258  | 0.000210401 | LST1                  | leukocyte specific transcript 1                                                  |
| 204466_s_at | 1.4847   | 0.000210401 | SNCA                  | synuclein, alpha (non A4 component of amyloid precursor)                         |
| 204204_at   | 1.38148  | 0.000211272 | SLC31A2               | solute carrier family 31 (copper transporters), member 2                         |
| 210762_s_at | -1.41313 | 0.000211743 | DLC1                  | deleted in liver cancer 1                                                        |
| 203801_at   | -1.22666 | 0.000216067 | MRPS14                | mitochondrial ribosomal protein S14                                              |
| 212567_s_at | -1.21927 | 0.000216067 | MAP4                  | microtubule-associated protein 4                                                 |
| 202315_s_at | -1.30758 | 0.000216451 | BCR                   | breakpoint cluster region                                                        |
| 204270_at   | -1.2142  | 0.000222072 | SKI                   | v-ski sarcoma viral oncogene homolog (avian)                                     |
| 219373_at   | 1.2701   | 0.000222304 | DPM3                  | dolichyl-phosphate mannosyltransferase polypeptide 3                             |
| 210629_x_at | 1.30764  | 0.000227185 | LST1                  | leukocyte specific transcript 1                                                  |
| 209012_at   | -1.33881 | 0.000227454 | TRIO                  | triple functional domain (PTPRF interacting)                                     |

|             |          |             |           |                                                                                  |
|-------------|----------|-------------|-----------|----------------------------------------------------------------------------------|
| 205325_at   | 1.28171  | 0.000227454 | PHYHIP    | phytanoyl-CoA 2-hydroxylase interacting protein                                  |
| 214703_s_at | -1.22925 | 0.000227663 | MAN2B2    | mannosidase, alpha, class 2B, member 2                                           |
| 213435_at   | -1.28758 | 0.000231155 | SATB2     | SATB homeobox 2                                                                  |
| 216867_s_at | -1.4028  | 0.000232388 | PDGFA     | platelet-derived growth factor alpha polypeptide                                 |
| 210115_at   | 1.39353  | 0.000234834 | RPL39L    | ribosomal protein L39-like                                                       |
| 209692_at   | -1.3377  | 0.000236352 | EYA2      | eyes absent homolog 2 (Drosophila)                                               |
| 205989_s_at | 1.67899  | 0.000236352 | MOG       | myelin oligodendrocyte glycoprotein                                              |
| 203960_s_at | 1.2065   | 0.000240867 | HSPB11    | heat shock protein family B (small), member 11                                   |
| 201847_at   | 1.25576  | 0.000240867 | LIPA      | lipase A, lysosomal acid, cholesterol esterase                                   |
| 205433_at   | -1.46668 | 0.000240867 | BCHE      | butyrylcholinesterase                                                            |
| 206465_at   | -1.55679 | 0.000241242 | ACSBG1    | acyl-CoA synthetase bubblegum family member 1                                    |
| 219628_at   | -1.30373 | 0.000243514 | ZMAT3     | zinc finger, matrin-type 3                                                       |
| 205923_at   | 1.30675  | 0.000245146 | RELN      | reelin                                                                           |
| 209695_at   | -1.2985  | 0.000245581 | PTP4A3    | protein tyrosine phosphatase type IVA, member 3                                  |
| 204950_at   | -1.21306 | 0.000253213 | CARD8     | caspase recruitment domain family, member 8                                      |
| 204201_s_at | -1.20663 | 0.000253213 | PTPN13    | protein tyrosine phosphatase, non-receptor type 13 (APO-1/CD95 (Fas)-associated) |
| 209684_at   | 1.21108  | 0.00025357  | RIN2      | Ras and Rab interactor 2                                                         |
| 211563_s_at | -1.23163 | 0.000253801 | C19orf2   | chromosome 19 open reading frame 2                                               |
| 222344_at   | -1.24207 | 0.00025483  | ---       | ---                                                                              |
| 210739_x_at | -1.37801 | 0.000254979 | SLC4A4    | solute carrier family 4, sodium bicarbonate cotransporter, member 4              |
| 219378_at   | -1.21686 | 0.000258677 | NAA16     | N(alpha)-acetyltransferase 16, NatA auxiliary subunit                            |
| 205637_s_at | 1.60595  | 0.000259015 | SH3GL3    | SH3-domain GRB2-like 3                                                           |
| 219365_s_at | 1.24559  | 0.000259034 | CAMKV     | CaM kinase-like vesicle-associated                                               |
| 47550_at    | -1.33414 | 0.000259746 | LZTS1     | leucine zipper, putative tumor suppressor 1                                      |
| 219032_x_at | 1.27011  | 0.000260721 | OPN3      | opsin 3                                                                          |
| 205917_at   | -1.31784 | 0.000266009 | ZNF264    | zinc finger protein 264                                                          |
| 202255_s_at | -1.26655 | 0.000268526 | SIPA1L1   | signal-induced proliferation-associated 1 like 1                                 |
| 209149_s_at | -1.2432  | 0.000270516 | TM9SF1    | transmembrane 9 superfamily member 1                                             |
| 210263_at   | -1.46323 | 0.000272824 | KCNF1     | potassium voltage-gated channel, subfamily F, member 1                           |
| 219538_at   | 1.21076  | 0.000273076 | WDR5B     | WD repeat domain 5B                                                              |
| 209806_at   | 1.30874  | 0.000273076 | HIST1H2BK | histone cluster 1, H2bk                                                          |
| 206772_at   | 1.21157  | 0.000273587 | PTH2R     | parathyroid hormone 2 receptor                                                   |
| 218330_s_at | -1.25043 | 0.000273925 | NAV2      | neuron navigator 2                                                               |
| 211890_x_at | 1.44827  | 0.000273925 | CAPN3     | calpain 3, (p94)                                                                 |
| 214650_x_at | 1.75859  | 0.00027599  | MOG       | myelin oligodendrocyte glycoprotein                                              |
| 214181_x_at | 1.349    | 0.00027599  | LST1      | leukocyte specific transcript 1                                                  |
| 203908_at   | -1.52422 | 0.000280318 | SLC4A4    | solute carrier family 4, sodium bicarbonate cotransporter, member 4              |
| 204412_s_at | 1.28364  | 0.000284056 | NEFH      | neurofilament, heavy polypeptide                                                 |
| 213436_at   | -1.57755 | 0.000284085 | CNR1      | cannabinoid receptor 1 (brain)                                                   |
| 205816_at   | -1.32479 | 0.000286865 | ITGB8     | integrin, beta 8                                                                 |
| 204840_s_at | -1.21291 | 0.000289937 | EEA1      | early endosome antigen 1                                                         |
| 205656_at   | -1.27573 | 0.000289937 | PCDH17    | protocadherin 17                                                                 |
| 222005_s_at | 1.54667  | 0.000292768 | GNG3      | guanine nucleotide binding protein (G protein), gamma 3                          |
| 219042_at   | -1.23613 | 0.000293393 | LZTS1     | leucine zipper, putative tumor suppressor 1                                      |
| 33850_at    | -1.2083  | 0.000293393 | MAP4      | microtubule-associated protein 4                                                 |
| 208212_s_at | -1.35678 | 0.000293393 | ALK       | anaplastic lymphoma receptor tyrosine kinase                                     |

|             |          |             |                       |                                                                                  |
|-------------|----------|-------------|-----------------------|----------------------------------------------------------------------------------|
| 204997_at   | 1.21635  | 0.000295314 | GPD1                  | glycerol-3-phosphate dehydrogenase 1 (soluble)                                   |
| 218211_s_at | 1.29723  | 0.000295314 | MLPH                  | melanophilin                                                                     |
| 206280_at   | 1.26501  | 0.000296467 | CDH18                 | cadherin 18, type 2                                                              |
| 213225_at   | -1.22263 | 0.000296692 | PPM1B                 | protein phosphatase, Mg2+/Mn2+ dependent, 1B                                     |
| 206014_at   | 1.43691  | 0.000296692 | ACTL6B                | actin-like 6B                                                                    |
| 201079_at   | 1.29501  | 0.000296829 | SYNGR2                | synaptogyrin 2                                                                   |
| 213156_at   | -1.31013 | 0.000297138 | ---                   | ---                                                                              |
| 210519_s_at | 1.35604  | 0.000298855 | NQO1                  | NAD(P)H dehydrogenase, quinone 1                                                 |
| 219429_at   | 1.50358  | 0.000309575 | FA2H                  | fatty acid 2-hydroxylase                                                         |
| 205383_s_at | -1.25459 | 0.000315715 | ZBTB20                | zinc finger and BTB domain containing 20                                         |
| 211581_x_at | 1.29792  | 0.000315715 | LST1                  | leukocyte specific transcript 1                                                  |
| 204465_s_at | 1.61175  | 0.000315715 | INA                   | internexin neuronal intermediate filament protein, alpha                         |
| 210650_s_at | 1.21099  | 0.000315715 | PCLO                  | piccolo (presynaptic cytomatrix protein)                                         |
| 216450_x_at | -1.23345 | 0.000316565 | HSP90B1               | heat shock protein 90kDa beta (Grp94), member 1                                  |
| 207012_at   | -1.50333 | 0.000317698 | MMP16                 | matrix metalloproteinase 16 (membrane-inserted)                                  |
| 208934_s_at | 1.27323  | 0.000326494 | LGALS8                | lectin, galactoside-binding, soluble, 8                                          |
| 208703_s_at | -1.22859 | 0.000327734 | APLP2                 | amyloid beta (A4) precursor-like protein 2                                       |
| 213789_at   | 1.23085  | 0.000328593 | ---                   | ---                                                                              |
| 213093_at   | -1.22167 | 0.000328788 | PRKCA                 | protein kinase C, alpha                                                          |
| 213558_at   | 1.40523  | 0.000329401 | PCLO                  | piccolo (presynaptic cytomatrix protein)                                         |
| 210169_at   | 1.279    | 0.000331768 | SEC14L5               | SEC14-like 5 ( <i>S. cerevisiae</i> )                                            |
| 212558_at   | -1.40144 | 0.000331768 | SPRY1                 | sprouty homolog 1, antagonist of FGF signaling ( <i>Drosophila</i> )             |
| 210253_at   | 1.35767  | 0.000337558 | HTATIP2               | HIV-1 Tat interactive protein 2, 30kDa                                           |
| 209896_s_at | -1.24441 | 0.000337558 | PTPN11                | protein tyrosine phosphatase, non-receptor type 11                               |
| 204271_s_at | -1.3744  | 0.000340161 | EDNRB                 | endothelin receptor type B                                                       |
| 209911_x_at | 1.37154  | 0.000340161 | HIST1H2BD             | histone cluster 1, H2bd                                                          |
| 211582_x_at | 1.34385  | 0.000345271 | LST1                  | leukocyte specific transcript 1                                                  |
| 209098_s_at | -1.39304 | 0.000347106 | JAG1                  | jagged 1                                                                         |
| 203395_s_at | -1.22419 | 0.000352935 | HES1                  | hairy and enhancer of split 1, ( <i>Drosophila</i> )                             |
| 219922_s_at | -1.23847 | 0.000352935 | LTBP3                 | latent transforming growth factor beta binding protein 3                         |
| 216836_s_at | -1.317   | 0.000353918 | ERBB2                 | v-erb-b2 erythroblastic leukemia viral oncogene homolog 2, neuro/glioblastoma de |
| 202695_s_at | -1.29325 | 0.000355336 | STK17A                | serine/threonine kinase 17a                                                      |
| 218631_at   | 1.20332  | 0.000355575 | AVPI1                 | arginine vasopressin-induced 1                                                   |
| 208451_s_at | -1.42691 | 0.000357751 | C4A /// C4B /// LOC10 | complement component 4A (Rodgers blood group) /// complement component 4B (Chido |
| 214722_at   | -1.24771 | 0.000357751 | NOTCH2NL              | notch 2 N-terminal like                                                          |
| 219140_s_at | 1.23605  | 0.000358263 | RBP4                  | retinol binding protein 4, plasma                                                |
| 207030_s_at | -1.29491 | 0.000361151 | CSRP2                 | cysteine and glycine-rich protein 2                                              |
| 216840_s_at | -1.40158 | 0.000361289 | LAMA2                 | laminin, alpha 2                                                                 |
| 207853_s_at | 1.30322  | 0.000361634 | SNCB                  | synuclein, beta                                                                  |
| 212951_at   | -1.27495 | 0.000361634 | GPR116                | G protein-coupled receptor 116                                                   |
| 211031_s_at | -1.29308 | 0.000361634 | CLIP2                 | CAP-GLY domain containing linker protein 2                                       |
| 219643_at   | -1.34252 | 0.000370246 | LRP1B                 | low density lipoprotein receptor-related protein 1B                              |
| 33767_at    | 1.4155   | 0.000371208 | NEFH                  | neurofilament, heavy polypeptide                                                 |
| 206773_at   | 1.50334  | 0.000374509 | LY6H                  | lymphocyte antigen 6 complex, locus H                                            |
| 204774_at   | 1.41478  | 0.00037664  | EVI2A                 | ecotropic viral integration site 2A                                              |
| 212926_at   | -1.21216 | 0.000383406 | SMC5                  | structural maintenance of chromosomes 5                                          |

|             |          |             |           |                                                               |
|-------------|----------|-------------|-----------|---------------------------------------------------------------|
| 210993_s_at | -1.20853 | 0.000383406 | SMAD1     | SMAD family member 1                                          |
| 200672_x_at | -1.20829 | 0.000383406 | SPTBN1    | spectrin, beta, non-erythrocytic 1                            |
| 203604_at   | -1.21328 | 0.000383406 | ZNF516    | zinc finger protein 516                                       |
| 221868_at   | 1.26704  | 0.000387943 | PAIP2B    | poly(A) binding protein interacting protein 2B                |
| 215248_at   | -1.36021 | 0.000388286 | GRB10     | growth factor receptor-bound protein 10                       |
| 222028_at   | -1.20354 | 0.000389671 | ZNF45     | zinc finger protein 45                                        |
| 221730_at   | -1.50578 | 0.000389674 | COL5A2    | collagen, type V, alpha 2                                     |
| 201369_s_at | -1.29898 | 0.000391261 | ZFP36L2   | zinc finger protein 36, C3H type-like 2                       |
| 202507_s_at | 1.63665  | 0.000399563 | SNAP25    | synaptosomal-associated protein, 25kDa                        |
| 202145_at   | 1.24781  | 0.000399733 | LY6E      | lymphocyte antigen 6 complex, locus E                         |
| 220305_at   | -1.20457 | 0.000400039 | MAVS      | mitochondrial antiviral signaling protein                     |
| 208997_s_at | 1.27656  | 0.000400156 | UCP2      | uncoupling protein 2 (mitochondrial, proton carrier)          |
| 218806_s_at | -1.27246 | 0.000402824 | VAV3      | vav 3 guanine nucleotide exchange factor                      |
| 205691_at   | 1.3664   | 0.000404342 | SYNGR3    | synaptogyrin 3                                                |
| 212667_at   | -1.24632 | 0.0004056   | SPARC     | secreted protein, acidic, cysteine-rich (osteonectin)         |
| 53071_s_at  | -1.20906 | 0.000409442 | C17orf101 | chromosome 17 open reading frame 101                          |
| 201897_s_at | 1.28602  | 0.000415915 | CKS1B     | CDC28 protein kinase regulatory subunit 1B                    |
| 220359_s_at | 1.3722   | 0.000424044 | ARPP21    | cAMP-regulated phosphoprotein, 21kDa                          |
| 201117_s_at | -1.29071 | 0.000427071 | CPE       | carboxypeptidase E                                            |
| 212750_at   | 1.34647  | 0.000427214 | PPP1R16B  | protein phosphatase 1, regulatory (inhibitor) subunit 16B     |
| 211596_s_at | -1.26937 | 0.000435317 | LRIG1     | leucine-rich repeats and immunoglobulin-like domains 1        |
| 215071_s_at | 1.35993  | 0.000435868 | HIST1H2AC | histone cluster 1, H2ac                                       |
| 204160_s_at | 1.51953  | 0.000435868 | ENPP4     | ectonucleotide pyrophosphatase/phosphodiesterase 4 (putative) |
| 205933_at   | -1.25318 | 0.000435868 | SETBP1    | SET binding protein 1                                         |
| 208579_x_at | 1.33675  | 0.000435868 | H2BFS     | H2B histone family, member S                                  |
| 205320_at   | -1.28064 | 0.000435868 | APC2      | adenomatous polyposis coli 2                                  |
| 63825_at    | -1.262   | 0.000436576 | ABHD2     | abhydrolase domain containing 2                               |
| 203543_s_at | -1.33336 | 0.000444334 | KLF9      | Kruppel-like factor 9                                         |
| 207180_s_at | 1.26298  | 0.000444334 | HTATIP2   | HIV-1 Tat interactive protein 2, 30kDa                        |
| 215633_x_at | 1.31582  | 0.000445146 | LST1      | leukocyte specific transcript 1                               |
| 213238_at   | -1.21376 | 0.000445703 | ATP10D    | ATPase, class V, type 10D                                     |
| 221486_at   | 1.20364  | 0.000445703 | ENSA      | endosulfine alpha                                             |
| 202668_at   | -1.28899 | 0.000449378 | EFNB2     | ephrin-B2                                                     |
| 210136_at   | 1.36447  | 0.000450844 | MBP       | myelin basic protein                                          |
| 202083_s_at | -1.26255 | 0.000451297 | SEC14L1   | SEC14-like 1 (S. cerevisiae)                                  |
| 218468_s_at | 1.20478  | 0.000451297 | GREM1     | gremlin 1                                                     |
| 205366_s_at | 1.24983  | 0.000462117 | HOXB6     | homeobox B6                                                   |
| 221556_at   | -1.20531 | 0.000464446 | CDC14B    | CDC14 cell division cycle 14 homolog B (S. cerevisiae)        |
| 221605_s_at | -1.50384 | 0.00046509  | PIPOX     | pipecolic acid oxidase                                        |
| 211932_at   | -1.20225 | 0.00046509  | HNRNPA3   | heterogeneous nuclear ribonucleoprotein A3                    |
| 222326_at   | -1.26867 | 0.00047205  | ---       | ---                                                           |
| 219992_at   | 1.46671  | 0.00047205  | TAC3      | tachykinin 3                                                  |
| 204428_s_at | -1.24714 | 0.000476029 | LCAT      | lecithin-cholesterol acyltransferase                          |
| 211148_s_at | -1.36705 | 0.000477715 | ANGPT2    | angiopoietin 2                                                |
| 214314_s_at | -1.22058 | 0.000477715 | EIF5B     | eukaryotic translation initiation factor 5B                   |
| 209445_x_at | 1.22162  | 0.00047805  | C7orf44   | chromosome 7 open reading frame 44                            |

|             |          |             |                     |                                                                                  |
|-------------|----------|-------------|---------------------|----------------------------------------------------------------------------------|
| 208892_s_at | -1.30694 | 0.000487958 | DUSP6               | dual specificity phosphatase 6                                                   |
| 212070_at   | -1.28166 | 0.000491326 | GPR56               | G protein-coupled receptor 56                                                    |
| 202133_at   | -1.31254 | 0.000497484 | WWTR1               | WW domain containing transcription regulator 1                                   |
| 209870_s_at | -1.23237 | 0.000506908 | APBA2               | amyloid beta (A4) precursor protein-binding, family A, member 2                  |
| 213779_at   | -1.2333  | 0.000506908 | EMID1               | EMI domain containing 1                                                          |
| 214829_at   | -1.21742 | 0.000514013 | AASS                | aminoadipate-semialdehyde synthase                                               |
| 91816_f_at  | -1.27257 | 0.000515651 | MEX3D               | mex-3 homolog D (C. elegans)                                                     |
| 203498_at   | 1.61896  | 0.000518377 | RCAN2               | regulator of calcineurin 2                                                       |
| 213543_at   | 1.25023  | 0.000524555 | SGCD                | sarcoglycan, delta (35kDa dystrophin-associated glycoprotein)                    |
| 203080_s_at | -1.22342 | 0.000530383 | BAZ2B               | bromodomain adjacent to zinc finger domain, 2B                                   |
| 214052_x_at | -1.21124 | 0.000532072 | BAT2L2              | HLA-B associated transcript 2-like 2                                             |
| 204118_at   | 1.36213  | 0.000536459 | CD48                | CD48 molecule                                                                    |
| 206928_at   | 1.25146  | 0.000536865 | ZNF124              | zinc finger protein 124                                                          |
| 209153_s_at | -1.2303  | 0.000546573 | TCF3                | transcription factor 3 (E2A immunoglobulin enhancer binding factors E12/E47)     |
| 204378_at   | 1.54452  | 0.000566907 | BCAS1               | breast carcinoma amplified sequence 1                                            |
| 212458_at   | -1.26748 | 0.000568929 | SPRED2              | sprouty-related, EVH1 domain containing 2                                        |
| 209020_at   | 1.21467  | 0.000584676 | C20orf111           | chromosome 20 open reading frame 111                                             |
| 203934_at   | -1.21067 | 0.000584676 | KDR                 | kinase insert domain receptor (a type III receptor tyrosine kinase)              |
| 219225_at   | 1.28496  | 0.000584676 | PGBD5               | piggyBac transposable element derived 5                                          |
| 212758_s_at | -1.25194 | 0.000584676 | ZEB1                | zinc finger E-box binding homeobox 1                                             |
| 221217_s_at | 1.2451   | 0.000584676 | RBFOX1              | RNA binding protein, fox-1 homolog (C. elegans) 1                                |
| 202759_s_at | -1.35248 | 0.000584676 | AKAP2 /// PALM2-AKA | A kinase (PRKA) anchor protein 2 /// PALM2-AKAP2 readthrough                     |
| 202962_at   | -1.22902 | 0.000584676 | KIF13B              | kinesin family member 13B                                                        |
| 203424_s_at | -1.43719 | 0.00058901  | IGFBP5              | insulin-like growth factor binding protein 5                                     |
| 202254_s_at | -1.27431 | 0.00058901  | SIPA1L1             | Signal-induced proliferation-associated 1 like 1                                 |
| 207714_s_at | -1.32161 | 0.00058901  | SERPINH1            | serpin peptidase inhibitor, clade H (heat shock protein 47), member 1, (collagen |
| 219616_at   | -1.44316 | 0.000596553 | ACSS3               | acyl-CoA synthetase short-chain family member 3                                  |
| 202760_s_at | -1.36722 | 0.000597426 | AKAP2 /// PALM2-AKA | A kinase (PRKA) anchor protein 2 /// PALM2-AKAP2 readthrough                     |
| 200878_at   | -1.23104 | 0.000597426 | EPAS1               | endothelial PAS domain protein 1                                                 |
| 222243_s_at | -1.2202  | 0.000597426 | TOB2                | transducer of ERBB2, 2                                                           |
| 211493_x_at | -1.23008 | 0.000597426 | DTNA                | dystrobrevin, alpha                                                              |
| 202149_at   | -1.26375 | 0.000603326 | NEDD9               | neural precursor cell expressed, developmentally down-regulated 9                |
| 209895_at   | -1.2355  | 0.000607763 | PTPN11              | protein tyrosine phosphatase, non-receptor type 11                               |
| 221480_at   | -1.20211 | 0.000607784 | HNRNPD              | heterogeneous nuclear ribonucleoprotein D (AU-rich element RNA binding protein 1 |
| 206448_at   | 1.33226  | 0.000608141 | ZNF365              | zinc finger protein 365                                                          |
| 219161_s_at | 1.21491  | 0.000610192 | CKLF                | chemokine-like factor                                                            |
| 203725_at   | -1.26266 | 0.000610661 | GADD45A             | growth arrest and DNA-damage-inducible, alpha                                    |
| 218859_s_at | -1.22273 | 0.000613135 | ESF1                | ESF1, nucleolar pre-rRNA processing protein, homolog (S. cerevisiae)             |
| 215215_s_at | 1.20745  | 0.000613135 | LOC81691            | exonuclease NEF-sp                                                               |
| 200808_s_at | -1.26849 | 0.000616593 | ZYX                 | zyxin                                                                            |
| 201465_s_at | -1.2428  | 0.00061964  | JUN                 | jun proto-oncogene                                                               |
| 202554_s_at | 1.30485  | 0.000626762 | GSTM3               | glutathione S-transferase mu 3 (brain)                                           |
| 204697_s_at | 1.35978  | 0.000633464 | CHGA                | chromogranin A (parathyroid secretory protein 1)                                 |
| 205489_at   | 1.52663  | 0.0006399   | CRYM                | crystallin, mu                                                                   |
| 220131_at   | 1.44955  | 0.000642437 | FXYP7               | FXYP7 domain containing ion transport regulator 7                                |
| 208891_at   | -1.30154 | 0.000648707 | DUSP6               | dual specificity phosphatase 6                                                   |

|             |          |             |           |                                                        |
|-------------|----------|-------------|-----------|--------------------------------------------------------|
| 202921_s_at | -1.27354 | 0.000669749 | ANK2      | ankyrin 2, neuronal                                    |
| 207135_at   | 1.28481  | 0.000682093 | HTR2A     | 5-hydroxytryptamine (serotonin) receptor 2A            |
| 203542_s_at | -1.29764 | 0.000687823 | KLF9      | Kruppel-like factor 9                                  |
| 206456_at   | 1.24608  | 0.000688803 | GABRA5    | gamma-aminobutyric acid (GABA) A receptor, alpha 5     |
| 219578_s_at | 1.24399  | 0.000692263 | CPEB1     | cytoplasmic polyadenylation element binding protein 1  |
| 207983_s_at | -1.21251 | 0.000692263 | STAG2     | stromal antigen 2                                      |
| 218438_s_at | 1.23239  | 0.000698297 | MED28     | mediator complex subunit 28                            |
| 212486_s_at | -1.26855 | 0.000698297 | FYN       | FYN oncogene related to SRC, FGR, YES                  |
| 204345_at   | -1.33093 | 0.000705218 | COL16A1   | collagen, type XVI, alpha 1                            |
| 205379_at   | 1.21796  | 0.000710373 | CBR3      | carbonyl reductase 3                                   |
| 221645_s_at | -1.23205 | 0.000718908 | ZNF83     | zinc finger protein 83                                 |
| 202661_at   | -1.201   | 0.000718908 | ITPR2     | inositol 1,4,5-triphosphate receptor, type 2           |
| 202724_s_at | -1.26122 | 0.000719579 | FOXO1     | forkhead box O1                                        |
| 215228_at   | 1.34183  | 0.000719579 | NHLH2     | nescient helix loop helix 2                            |
| 206408_at   | -1.43737 | 0.000724294 | LRRTM2    | leucine rich repeat transmembrane neuronal 2           |
| 219973_at   | -1.3761  | 0.000731733 | ARSJ      | arylsulfatase family, member J                         |
| 209841_s_at | -1.3041  | 0.000731733 | LRRN3     | leucine rich repeat neuronal 3                         |
| 201732_s_at | -1.20755 | 0.00073332  | CLCN3     | chloride channel 3                                     |
| 222121_at   | -1.22846 | 0.000741556 | ARHGEF26  | Rho guanine nucleotide exchange factor (GEF) 26        |
| 201200_at   | 1.25297  | 0.000749694 | CREG1     | cellular repressor of E1A-stimulated genes 1           |
| 219265_at   | 1.22563  | 0.000749694 | MOBKLB    | MOB1, Mps One Binder kinase activator-like 2B (yeast)  |
| 209663_s_at | -1.3432  | 0.000749694 | ITGA7     | integrin, alpha 7                                      |
| 206196_s_at | 1.48287  | 0.000749694 | RUNDC3A   | RUN domain containing 3A                               |
| 214956_at   | 1.21284  | 0.000753113 | AAK1      | AP2 associated kinase 1                                |
| 212950_at   | -1.23578 | 0.000753411 | GPR116    | G protein-coupled receptor 116                         |
| 204823_at   | 1.42484  | 0.000753411 | NAV3      | neuron navigator 3                                     |
| 213998_s_at | -1.28092 | 0.000782026 | DDX17     | DEAD (Asp-Glu-Ala-Asp) box polypeptide 17              |
| 212775_at   | -1.20977 | 0.000789532 | OBSL1     | obscurin-like 1                                        |
| 201505_at   | -1.45136 | 0.000793895 | LAMB1     | laminin, beta 1                                        |
| 219738_s_at | -1.3305  | 0.000795004 | PCDH9     | protocadherin 9                                        |
| 203705_s_at | -1.4177  | 0.000803824 | FZD7      | frizzled homolog 7 (Drosophila)                        |
| 202920_at   | -1.22309 | 0.000807524 | ANK2      | ankyrin 2, neuronal                                    |
| 201116_s_at | -1.29266 | 0.000824055 | CPE       | carboxypeptidase E                                     |
| 212845_at   | -1.24199 | 0.000829795 | SAMD4A    | sterile alpha motif domain containing 4A               |
| 209295_at   | -1.27661 | 0.000832351 | TNFRSF10B | tumor necrosis factor receptor superfamily, member 10b |
| 204014_at   | -1.47822 | 0.000836093 | DUSP4     | dual specificity phosphatase 4                         |
| 206678_at   | 1.43378  | 0.000838431 | GABRA1    | gamma-aminobutyric acid (GABA) A receptor, alpha 1     |
| 203890_s_at | -1.2193  | 0.000847577 | DAPK3     | death-associated protein kinase 3                      |
| 209094_at   | -1.20641 | 0.000858195 | DDAH1     | dimethylarginine dimethylaminohydrolase 1              |
| 205524_s_at | -1.32028 | 0.000869725 | HAPLN1    | hyaluronan and proteoglycan link protein 1             |
| 210372_s_at | 1.34242  | 0.000870152 | TPD52L1   | tumor protein D52-like 1                               |
| 213910_at   | -1.20774 | 0.000874207 | IGFBP7    | insulin-like growth factor binding protein 7           |
| 203471_s_at | 1.28828  | 0.000891429 | PLEK      | pleckstrin                                             |
| 219308_s_at | 1.35722  | 0.00090849  | AK5       | adenylate kinase 5                                     |
| 214475_x_at | 1.48028  | 0.00090849  | CAPN3     | calpain 3, (p94)                                       |
| 209793_at   | -1.58971 | 0.00090849  | GRIA1     | glutamate receptor, ionotropic, AMPA 1                 |

|             |          |             |          |                                                                                        |
|-------------|----------|-------------|----------|----------------------------------------------------------------------------------------|
| 212776_s_at | -1.23538 | 0.00092033  | OBSL1    | obscurin-like 1                                                                        |
| 203946_s_at | 1.30364  | 0.000929508 | ARG2     | arginase, type II                                                                      |
| 203425_s_at | -1.25537 | 0.000942094 | IGFBP5   | insulin-like growth factor binding protein 5                                           |
| 213069_at   | -1.22555 | 0.00094972  | HEG1     | HEG homolog 1 (zebrafish)                                                              |
| 209292_at   | -1.4511  | 0.00094972  | ID4      | Inhibitor of DNA binding 4, dominant negative helix-loop-helix protein                 |
| 205463_s_at | -1.38689 | 0.000952239 | PDGFA    | platelet-derived growth factor alpha polypeptide                                       |
| 220287_at   | -1.22125 | 0.000953744 | ADAMTS9  | ADAM metalloproteinase with thrombospondin type 1 motif, 9                             |
| 203497_at   | -1.22026 | 0.000958136 | MED1     | mediator complex subunit 1                                                             |
| 220551_at   | 1.34969  | 0.000971802 | SLC17A6  | solute carrier family 17 (sodium-dependent inorganic phosphate cotransporter), m       |
| 219574_at   | 1.27984  | 0.000974268 | 40969    | membrane-associated ring finger (C3HC4) 1                                              |
| 218623_at   | 1.47098  | 0.000980134 | HMP19    | HMP19 protein                                                                          |
| 216456_at   | -1.25792 | 0.000988342 | ---      | ---                                                                                    |
| 212268_at   | 1.33787  | 0.00100474  | SERPINB1 | serpin peptidase inhibitor, clade B (ovalbumin), member 1                              |
| 205404_at   | 1.20998  | 0.00100796  | HSD11B1  | hydroxysteroid (11-beta) dehydrogenase 1                                               |
| 218456_at   | -1.21877 | 0.00101905  | CAPRIN2  | caprin family member 2                                                                 |
| 201069_at   | -1.31939 | 0.00101905  | MMP2     | matrix metalloproteinase 2 (gelatinase A, 72kDa gelatinase, 72kDa type IV collagenase) |
| 203153_at   | 1.49247  | 0.00101925  | IFIT1    | interferon-induced protein with tetratricopeptide repeats 1                            |
| 214806_at   | -1.21996 | 0.00102474  | BICD1    | bicaudal D homolog 1 (Drosophila)                                                      |
| 221527_s_at | -1.21823 | 0.00102844  | PARD3    | par-3 partitioning defective 3 homolog (C. elegans)                                    |
| 210729_at   | -1.33043 | 0.00103364  | NPY2R    | neuropeptide Y receptor Y2                                                             |
| 220574_at   | -1.20526 | 0.00103364  | SEMA6D   | sema domain, transmembrane domain (TM), and cytoplasmic domain, (semaphorin) 6D        |
| 203185_at   | -1.27301 | 0.00104875  | RASSF2   | Ras association (RalGDS/AF-6) domain family member 2                                   |
| 31874_at    | -1.22103 | 0.00105147  | GAS2L1   | growth arrest-specific 2 like 1                                                        |
| 210721_s_at | 1.30432  | 0.00105686  | PAK7     | p21 protein (Cdc42/Rac)-activated kinase 7                                             |
| 213157_s_at | -1.27314 | 0.00105928  | WSCD1    | WSC domain containing 1                                                                |
| 204916_at   | -1.31931 | 0.00106181  | RAMP1    | receptor (G protein-coupled) activity modifying protein 1                              |
| 206825_at   | -1.53204 | 0.00106998  | OXTR     | oxytocin receptor                                                                      |
| 208121_s_at | 1.27412  | 0.00107758  | PTPRO    | protein tyrosine phosphatase, receptor type, O                                         |
| 210715_s_at | 1.20734  | 0.00108023  | SPINT2   | serine peptidase inhibitor, Kunitz type, 2                                             |
| 203242_s_at | -1.25933 | 0.00109004  | PDLIM5   | PDZ and LIM domain 5                                                                   |
| 207659_s_at | 1.66515  | 0.00110029  | MOBP     | myelin-associated oligodendrocyte basic protein                                        |
| 212012_at   | -1.34702 | 0.00110094  | PXDN     | peroxidasin homolog (Drosophila)                                                       |
| 203400_s_at | 1.68483  | 0.00111159  | TF       | transferrin                                                                            |
| 221933_at   | -1.21418 | 0.00112135  | NLGN4X   | neuroligin 4, X-linked                                                                 |
| 213666_at   | 1.25689  | 0.00113095  | 41158    | septin 6                                                                               |
| 221748_s_at | -1.25224 | 0.001142    | TNS1     | tensin 1                                                                               |
| 205859_at   | 1.36572  | 0.00114464  | LY86     | lymphocyte antigen 86                                                                  |
| 212091_s_at | -1.32503 | 0.00115069  | COL6A1   | collagen, type VI, alpha 1                                                             |
| 207076_s_at | 1.42434  | 0.00116474  | ASS1     | argininosuccinate synthase 1                                                           |
| 217388_s_at | 1.31962  | 0.00117388  | KYNU     | kynureninase (L-kynurenine hydrolase)                                                  |
| 213341_at   | -1.20618 | 0.00117391  | FEM1C    | fem-1 homolog c (C. elegans)                                                           |
| 220543_at   | -1.4626  | 0.00119056  | C21orf62 | chromosome 21 open reading frame 62                                                    |
| 214157_at   | 1.3497   | 0.00120348  | GNAS     | GNAS complex locus                                                                     |
| 208789_at   | -1.2893  | 0.00120881  | PTRF     | polymerase I and transcript release factor                                             |
| 208961_s_at | -1.22916 | 0.00121031  | KLF6     | Kruppel-like factor 6                                                                  |
| 204122_at   | 1.31857  | 0.00121031  | TYROBP   | TYRO protein tyrosine kinase binding protein                                           |

|             |          |            |              |                                                                                 |
|-------------|----------|------------|--------------|---------------------------------------------------------------------------------|
| 204249_s_at | -1.28588 | 0.00121031 | LMO2         | LIM domain only 2 (rhombotin-like 1)                                            |
| 210066_s_at | -1.48199 | 0.00121171 | AQP4         | aquaporin 4                                                                     |
| 209840_s_at | -1.29389 | 0.00121563 | LRRN3        | leucine rich repeat neuronal 3                                                  |
| 205121_at   | -1.22148 | 0.00122744 | SGCB         | sarcoglycan, beta (43kDa dystrophin-associated glycoprotein)                    |
| 220975_s_at | -1.25855 | 0.00123195 | C1QTNF1      | C1q and tumor necrosis factor related protein 1                                 |
| 204073_s_at | 1.44794  | 0.00123506 | C11orf9      | chromosome 11 open reading frame 9                                              |
| 209431_s_at | -1.20466 | 0.00125031 | PATZ1        | POZ (BTB) and AT hook containing zinc finger 1                                  |
| 210040_at   | 1.37606  | 0.00125362 | SLC12A5      | solute carrier family 12 (potassium/chloride transporter), member 5             |
| 204042_at   | -1.29345 | 0.0012662  | WASF3        | WAS protein family, member 3                                                    |
| 201617_x_at | -1.25136 | 0.00126638 | CALD1        | caldesmon 1                                                                     |
| 221919_at   | -1.2123  | 0.0012685  | LOC100506653 | hypothetical LOC100506653                                                       |
| 221489_s_at | -1.44305 | 0.00128144 | SPRY4        | sprouty homolog 4 (Drosophila)                                                  |
| 203636_at   | -1.20554 | 0.00128144 | MID1         | midline 1 (Opitz/BBB syndrome)                                                  |
| 209883_at   | -1.31851 | 0.00130468 | GLT25D2      | glycosyltransferase 25 domain containing 2                                      |
| 214433_s_at | 1.32894  | 0.0013064  | SELENBP1     | selenium binding protein 1                                                      |
| 206001_at   | 1.58719  | 0.00131495 | NPY          | neuropeptide Y                                                                  |
| 210235_s_at | -1.20951 | 0.00132884 | PPFIA1       | protein tyrosine phosphatase, receptor type, f polypeptide (PTPRF), interacting |
| 202508_s_at | 1.63164  | 0.00133432 | SNAP25       | synaptosomal-associated protein, 25kDa                                          |
| 210247_at   | 1.25714  | 0.00133761 | SYN2         | synapsin II                                                                     |
| 204469_at   | -1.26609 | 0.00134655 | PTPRZ1       | protein tyrosine phosphatase, receptor-type, Z polypeptide 1                    |
| 211663_x_at | 1.53162  | 0.00136642 | PTGDS        | prostaglandin D2 synthase 21kDa (brain)                                         |
| 209398_at   | 1.35179  | 0.00136876 | HIST1H1C     | histone cluster 1, H1c                                                          |
| 208719_s_at | -1.27776 | 0.00136876 | DDX17        | DEAD (Asp-Glu-Ala-Asp) box polypeptide 17                                       |
| 213439_x_at | 1.2245   | 0.00137336 | RUNDC3A      | RUN domain containing 3A                                                        |
| 207173_x_at | -1.20824 | 0.00137888 | CDH11        | cadherin 11, type 2, OB-cadherin (osteoblast)                                   |
| 213108_at   | 1.28857  | 0.00140821 | CAMK2A       | calcium/calmodulin-dependent protein kinase II alpha                            |
| 213638_at   | 1.27101  | 0.00143158 | PHACTR1      | phosphatase and actin regulator 1                                               |
| 219403_s_at | 1.25858  | 0.00143833 | HPSE         | heparanase                                                                      |
| 215017_s_at | -1.21742 | 0.00144191 | FNBP1L       | formin binding protein 1-like                                                   |
| 213830_at   | -1.71482 | 0.00144761 | TRD@         | T cell receptor delta locus                                                     |
| 221815_at   | -1.24887 | 0.00145298 | ABHD2        | abhydrolase domain containing 2                                                 |
| 202112_at   | -1.26922 | 0.00151236 | VWF          | von Willebrand factor                                                           |
| 203786_s_at | 1.44447  | 0.00151236 | TPD52L1      | tumor protein D52-like 1                                                        |
| 219064_at   | -1.2172  | 0.00153453 | ITIH5        | inter-alpha (globulin) inhibitor H5                                             |
| 211067_s_at | -1.27723 | 0.00154674 | GAS7         | growth arrest-specific 7                                                        |
| 212985_at   | -1.22509 | 0.00156947 | APBB2        | amyloid beta (A4) precursor protein-binding, family B, member 2                 |
| 205257_s_at | 1.37406  | 0.00157359 | AMPH         | amphiphysin                                                                     |
| 219763_at   | 1.2686   | 0.00158365 | DENND1A      | DENN/MADD domain containing 1A                                                  |
| 202718_at   | -1.46494 | 0.00159258 | IGFBP2       | insulin-like growth factor binding protein 2, 36kDa                             |
| 204869_at   | 1.30995  | 0.00160257 | PCSK2        | proprotein convertase subtilisin/kexin type 2                                   |
| 204224_s_at | 1.27256  | 0.00161008 | GCH1         | GTP cyclohydrolase 1                                                            |
| 213990_s_at | 1.24046  | 0.00162515 | PAK7         | p21 protein (Cdc42/Rac)-activated kinase 7                                      |
| 202284_s_at | -1.27215 | 0.00162515 | CDKN1A       | cyclin-dependent kinase inhibitor 1A (p21, Cip1)                                |
| 212646_at   | -1.27527 | 0.00162515 | RFTN1        | raftlin, lipid raft linker 1                                                    |
| 204733_at   | 1.47843  | 0.00163229 | KLK6         | kallikrein-related peptidase 6                                                  |
| 210193_at   | 1.42502  | 0.00163285 | MOBP         | myelin-associated oligodendrocyte basic protein                                 |



|             |          |            |           |                                                               |
|-------------|----------|------------|-----------|---------------------------------------------------------------|
| 202546_at   | 1.33152  | 0.00163557 | VAMP8     | vesicle-associated membrane protein 8 (endobrevin)            |
| 219728_at   | 1.37165  | 0.00163557 | MYOT      | myotilin                                                      |
| 212187_x_at | 1.56898  | 0.00163663 | PTGDS     | prostaglandin D2 synthase 21kDa (brain)                       |
| 212387_at   | -1.20176 | 0.00165812 | TCF4      | transcription factor 4                                        |
| 202421_at   | -1.28964 | 0.00165812 | IGSF3     | immunoglobulin superfamily, member 3                          |
| 208636_at   | -1.2627  | 0.0016904  | ACTN1     | actinin, alpha 1                                              |
| 204678_s_at | 1.31433  | 0.00169356 | KCNK1     | potassium channel, subfamily K, member 1                      |
| 210016_at   | 1.49468  | 0.00169458 | MYT1L     | myelin transcription factor 1-like                            |
| 210944_s_at | 1.47033  | 0.00169458 | CAPN3     | calpain 3, (p94)                                              |
| 204214_s_at | 1.30626  | 0.00169955 | RAB32     | RAB32, member RAS oncogene family                             |
| 205613_at   | -1.21373 | 0.00169955 | SYT17     | synaptotagmin XVII                                            |
| 221496_s_at | -1.2383  | 0.00169955 | TOB2      | transducer of ERBB2, 2                                        |
| 218975_at   | -1.22618 | 0.00170981 | COL5A3    | collagen, type V, alpha 3                                     |
| 207172_s_at | -1.24439 | 0.00171958 | CDH11     | cadherin 11, type 2, OB-cadherin (osteoblast)                 |
| 206306_at   | -1.50625 | 0.00173141 | RYR3      | ryanodine receptor 3                                          |
| 204069_at   | -1.30127 | 0.00173544 | MEIS1     | Meis homeobox 1                                               |
| 214913_at   | -1.46628 | 0.00173544 | ADAMTS3   | ADAM metalloproteinase with thrombospondin type 1 motif, 3    |
| 211748_x_at | 1.53848  | 0.00173652 | PTGDS     | prostaglandin D2 synthase 21kDa (brain)                       |
| 204319_s_at | 1.29102  | 0.00173712 | RGS10     | regulator of G-protein signaling 10                           |
| 204561_x_at | 1.35796  | 0.00174065 | APOC2     | apolipoprotein C-II                                           |
| 206715_at   | 1.23638  | 0.00174696 | TFEC      | transcription factor EC                                       |
| 214063_s_at | 1.64466  | 0.00175591 | TF        | transferrin                                                   |
| 204161_s_at | 1.3156   | 0.00175591 | ENPP4     | ectonucleotide pyrophosphatase/phosphodiesterase 4 (putative) |
| 219304_s_at | -1.45808 | 0.00177451 | PDGFD     | platelet derived growth factor D                              |
| 215706_x_at | -1.22222 | 0.00178111 | ZYX       | zyxin                                                         |
| 204103_at   | 1.48475  | 0.00178851 | CCL4      | chemokine (C-C motif) ligand 4                                |
| 210609_s_at | -1.24896 | 0.00179177 | TP53I3    | tumor protein p53 inducible protein 3                         |
| 219726_at   | -1.22326 | 0.00179177 | NLGN3     | neuroligin 3                                                  |
| 202016_at   | -1.33187 | 0.00179177 | MEST      | mesoderm specific transcript homolog (mouse)                  |
| 205626_s_at | 1.36054  | 0.00180799 | CALB1     | calbindin 1, 28kDa                                            |
| 205590_at   | -1.40319 | 0.00181441 | RASGRP1   | RAS guanyl releasing protein 1 (calcium and DAG-regulated)    |
| 203798_s_at | 1.54713  | 0.00181553 | VSNL1     | visinin-like 1                                                |
| 216307_at   | 1.31024  | 0.00181553 | DGKB      | diacylglycerol kinase, beta 90kDa                             |
| 218404_at   | 1.43417  | 0.0018227  | SNX10     | sorting nexin 10                                              |
| 207643_s_at | -1.21402 | 0.0018227  | TNFRSF1A  | tumor necrosis factor receptor superfamily, member 1A         |
| 203706_s_at | -1.36894 | 0.00183353 | FZD7      | frizzled homolog 7 (Drosophila)                               |
| 210445_at   | 1.22383  | 0.00183671 | FABP6     | fatty acid binding protein 6, ileal                           |
| 222067_x_at | 1.20415  | 0.00186208 | HIST1H2BD | histone cluster 1, H2bd                                       |
| 207677_s_at | 1.21496  | 0.00186208 | NCF4      | neutrophil cytosolic factor 4, 40kDa                          |
| 214735_at   | 1.22647  | 0.00186208 | IPCEF1    | interaction protein for cytohesin exchange factors 1          |
| 203708_at   | -1.22849 | 0.00188069 | PDE4B     | phosphodiesterase 4B, cAMP-specific                           |
| 221666_s_at | 1.2985   | 0.00188167 | PYCARD    | PYD and CARD domain containing                                |
| 209933_s_at | 1.27277  | 0.00188746 | CD300A    | CD300a molecule                                               |
| 204547_at   | 1.23799  | 0.0018889  | RAB40B    | RAB40B, member RAS oncogene family                            |
| 208464_at   | -1.20004 | 0.0018889  | GRIA4     | glutamate receptor, ionotropic, AMPA 4                        |
| 208782_at   | -1.22925 | 0.0018889  | FSTL1     | follistatin-like 1                                            |

|             |          |            |                   |                                                                                  |
|-------------|----------|------------|-------------------|----------------------------------------------------------------------------------|
| 204324_s_at | -1.2033  | 0.00193952 | GOLIM4            | golgi integral membrane protein 4                                                |
| 221031_s_at | -1.22765 | 0.00194034 | APOLD1            | apolipoprotein L domain containing 1                                             |
| 221899_at   | -1.23119 | 0.00194604 | N4BP2L2           | NEDD4 binding protein 2-like 2                                                   |
| 211651_s_at | -1.3945  | 0.00194604 | LAMB1             | laminin, beta 1                                                                  |
| 203637_s_at | -1.2014  | 0.00198883 | MID1              | midline 1 (Opitz/BBB syndrome)                                                   |
| 208107_s_at | 1.2433   | 0.00199022 | LOC81691          | exonuclease NEF-sp                                                               |
| 204679_at   | 1.46772  | 0.0019921  | KCNK1             | potassium channel, subfamily K, member 1                                         |
| 205695_at   | 1.2034   | 0.00202603 | SDS               | serine dehydratase                                                               |
| 204677_at   | -1.25396 | 0.00203479 | CDH5              | cadherin 5, type 2 (vascular endothelium)                                        |
| 217811_at   | 1.21596  | 0.00203869 | SELT              | selenoprotein T                                                                  |
| 202723_s_at | -1.24458 | 0.00203869 | FOXO1             | forkhead box O1                                                                  |
| 219073_s_at | -1.30657 | 0.00204501 | OSBPL10           | oxysterol binding protein-like 10                                                |
| 219635_at   | -1.21456 | 0.00204501 | ZNF606            | zinc finger protein 606                                                          |
| 213359_at   | -1.26023 | 0.00205941 | HNRNPD            | Heterogeneous nuclear ribonucleoprotein D (AU-rich element RNA binding protein 1 |
| 219478_at   | 1.25481  | 0.00206395 | WFDC1             | WAP four-disulfide core domain 1                                                 |
| 204712_at   | 1.39527  | 0.00207007 | WIF1              | WNT inhibitory factor 1                                                          |
| 221261_x_at | -1.22494 | 0.00207664 | MAGED4 /// MAGED4 | melanoma antigen family D, 4 /// melanoma antigen family D, 4B                   |
| 204724_s_at | -1.51259 | 0.00208984 | COL9A3            | collagen, type IX, alpha 3                                                       |
| 218807_at   | -1.36226 | 0.00210132 | VAV3              | vav 3 guanine nucleotide exchange factor                                         |
| 205551_at   | 1.37169  | 0.00211214 | SV2B              | synaptic vesicle glycoprotein 2B                                                 |
| 216222_s_at | -1.27443 | 0.00212441 | MYO10             | myosin X                                                                         |
| 210906_x_at | -1.35419 | 0.00213842 | AQP4              | aquaporin 4                                                                      |
| 214120_at   | 1.25004  | 0.00221145 | RFPL1S            | RFPL1 antisense RNA (non-protein coding)                                         |
| 207574_s_at | -1.28465 | 0.00222227 | GADD45B           | growth arrest and DNA-damage-inducible, beta                                     |
| 213703_at   | -1.23992 | 0.00222272 | LOC150759         | hypothetical LOC150759                                                           |
| 207323_s_at | 1.69615  | 0.00222485 | MBP               | myelin basic protein                                                             |
| 213338_at   | -1.35191 | 0.00222708 | TMEM158           | transmembrane protein 158 (gene/pseudogene)                                      |
| 204230_s_at | 1.34355  | 0.00224207 | SLC17A7           | solute carrier family 17 (sodium-dependent inorganic phosphate cotransporter), m |
| 204680_s_at | 1.22187  | 0.00225813 | RAPGEF5           | Rap guanine nucleotide exchange factor (GEF) 5                                   |
| 207084_at   | -1.26272 | 0.00227602 | POU3F2            | POU class 3 homeobox 2                                                           |
| 201746_at   | -1.23232 | 0.00228011 | TP53              | tumor protein p53                                                                |
| 209591_s_at | -1.35433 | 0.00229287 | BMP7              | bone morphogenetic protein 7                                                     |
| 217143_s_at | -1.58486 | 0.002304   | TRD@              | T cell receptor delta locus                                                      |
| 210508_s_at | -1.45391 | 0.00231204 | KCNQ2             | potassium voltage-gated channel, KQT-like subfamily, member 2                    |
| 218541_s_at | -1.36068 | 0.00234872 | C8orf4            | chromosome 8 open reading frame 4                                                |
| 218856_at   | -1.23386 | 0.00236565 | TNFRSF21          | tumor necrosis factor receptor superfamily, member 21                            |
| 218902_at   | -1.21927 | 0.00237749 | NOTCH1            | notch 1                                                                          |
| 204057_at   | 1.23151  | 0.00238953 | IRF8              | interferon regulatory factor 8                                                   |
| 206701_x_at | -1.31888 | 0.00238954 | EDNRB             | endothelin receptor type B                                                       |
| 218728_s_at | 1.20014  | 0.0024006  | CNIH4             | cornichon homolog 4 (Drosophila)                                                 |
| 205739_x_at | -1.20238 | 0.00241583 | ZNF107            | zinc finger protein 107                                                          |
| 204743_at   | 1.40424  | 0.002421   | TAGLN3            | transgelin 3                                                                     |
| 204457_s_at | -1.38278 | 0.00243558 | GAS1              | growth arrest-specific 1                                                         |
| 201791_s_at | -1.20217 | 0.00243558 | DHCR7             | 7-dehydrocholesterol reductase                                                   |
| 207957_s_at | 1.37232  | 0.00243558 | PRKCB             | protein kinase C, beta                                                           |
| 201976_s_at | -1.2167  | 0.00244184 | MYO10             | myosin X                                                                         |

|                     |          |            |                     |                                                                  |
|---------------------|----------|------------|---------------------|------------------------------------------------------------------|
| 219700_at           | -1.25204 | 0.00244602 | PLXDC1              | plexin domain containing 1                                       |
| 203476_at           | 1.45927  | 0.00244796 | TPBG                | trophoblast glycoprotein                                         |
| 208002_s_at         | 1.2294   | 0.00247767 | ACOT7               | acyl-CoA thioesterase 7                                          |
| 202697_at           | 1.20673  | 0.00247767 | NUDT21              | nudix (nucleoside diphosphate linked moiety X)-type motif 21     |
| 209013_x_at         | -1.25803 | 0.00255526 | TRIO                | triple functional domain (PTPRF interacting)                     |
| 207469_s_at         | 1.35097  | 0.00255823 | PIR                 | pirin (iron-binding nuclear protein)                             |
| 212719_at           | -1.25675 | 0.00258587 | PHLPP1              | PH domain and leucine rich repeat protein phosphatase 1          |
| 219646_at           | 1.20862  | 0.00260734 | DEF8                | differentially expressed in FDCP 8 homolog (mouse)               |
| 216191_s_at         | -1.53344 | 0.00260766 | TRDV3               | T cell receptor delta variable 3                                 |
| 209448_at           | 1.30345  | 0.00261248 | HTATIP2             | HIV-1 Tat interactive protein 2, 30kDa                           |
| 213326_at           | 1.22672  | 0.00269868 | VAMP1               | vesicle-associated membrane protein 1 (synaptobrevin 1)          |
| 209072_at           | 1.93587  | 0.00270413 | MBP                 | myelin basic protein                                             |
| 207261_at           | -1.37332 | 0.00270912 | CNGA3               | cyclic nucleotide gated channel alpha 3                          |
| 212533_at           | -1.23512 | 0.00270912 | WEE1                | WEE1 homolog (S. pombe)                                          |
| 205580_s_at         | -1.28306 | 0.00274041 | HRH1                | histamine receptor H1                                            |
| 206167_s_at         | -1.24443 | 0.00275459 | ARHGAP6             | Rho GTPase activating protein 6                                  |
| 212328_at           | -1.21937 | 0.0027645  | LIMCH1              | LIM and calponin homology domains 1                              |
| 207437_at           | -1.22307 | 0.00277051 | NOVA1               | neuro-oncological ventral antigen 1                              |
| vFFX-r2-Ec-bioC-3_a | -1.28369 | 0.00277821 | ---                 | ---                                                              |
| 208893_s_at         | -1.26531 | 0.00280313 | DUSP6               | dual specificity phosphatase 6                                   |
| 206866_at           | -1.28106 | 0.00280823 | CDH4                | cadherin 4, type 1, R-cadherin (retinal)                         |
| 209487_at           | -1.28691 | 0.00281607 | RBPM5               | RNA binding protein with multiple splicing                       |
| 214457_at           | 1.2744   | 0.00285421 | HOXA2               | homeobox A2                                                      |
| 213212_x_at         | -1.23108 | 0.00289768 | GOLGA6L5 /// GOLGA6 | golgin A6 family-like 5 (pseudogene) /// golgin A6 family-like 9 |
| 205579_at           | -1.29977 | 0.00290065 | HRH1                | histamine receptor H1                                            |
| 205306_x_at         | 1.20915  | 0.00292824 | KMO                 | kynurenine 3-monooxygenase (kynurenine 3-hydroxylase)            |
| 219833_s_at         | -1.21627 | 0.0029335  | EFHC1               | EF-hand domain (C-terminal) containing 1                         |
| 219799_s_at         | 1.28521  | 0.00293743 | DHRS9               | dehydrogenase/reductase (SDR family) member 9                    |
| 200965_s_at         | -1.23647 | 0.00294239 | ABLIM1              | actin binding LIM protein 1                                      |
| 220239_at           | 1.24557  | 0.00294239 | KLHL7               | kelch-like 7 (Drosophila)                                        |
| 208018_s_at         | 1.29984  | 0.00296585 | HCK                 | hemopoietic cell kinase                                          |
| 219773_at           | -1.23851 | 0.00298166 | NOX4                | NADPH oxidase 4                                                  |
| 219269_at           | -1.2132  | 0.00300482 | HMBX1               | homeobox containing 1                                            |
| 221766_s_at         | -1.25231 | 0.00300987 | FAM46A              | family with sequence similarity 46, member A                     |
| 206025_s_at         | -1.4118  | 0.00303034 | TNFAIP6             | tumor necrosis factor, alpha-induced protein 6                   |
| 209081_s_at         | -1.22377 | 0.00303274 | COL18A1             | collagen, type XVIII, alpha 1                                    |
| 205425_at           | -1.27746 | 0.00303509 | HIP1                | huntingtin interacting protein 1                                 |
| 206381_at           | 1.22013  | 0.00303509 | SCN2A               | sodium channel, voltage-gated, type II, alpha subunit            |
| 218618_s_at         | -1.22465 | 0.00304627 | FNDC3B              | fibronectin type III domain containing 3B                        |
| 202203_s_at         | -1.24178 | 0.0030473  | AMFR                | autocrine motility factor receptor                               |
| 214808_at           | -1.21579 | 0.00306941 | ---                 | ---                                                              |
| 204955_at           | -1.40937 | 0.00308509 | SRPX                | sushi-repeat-containing protein, X-linked                        |
| 209590_at           | -1.28743 | 0.0030871  | BMP7                | bone morphogenetic protein 7                                     |
| 208370_s_at         | -1.28264 | 0.00313806 | RCAN1               | regulator of calcineurin 1                                       |
| 207789_s_at         | -1.34127 | 0.00314464 | DPP6                | dipeptidyl-peptidase 6                                           |
| 205499_at           | -1.41708 | 0.00314999 | SRPX2               | sushi-repeat-containing protein, X-linked 2                      |

|                |          |            |              |                                                                                          |
|----------------|----------|------------|--------------|------------------------------------------------------------------------------------------|
| 218901_at      | -1.2431  | 0.00315339 | PLSCR4       | phospholipid scramblase 4                                                                |
| 204379_s_at    | -1.53082 | 0.00322534 | FGFR3        | fibroblast growth factor receptor 3                                                      |
| 215399_s_at    | -1.26981 | 0.00323833 | OS9          | osteosarcoma amplified 9, endoplasmic reticulum lectin                                   |
| 206201_s_at    | -1.64381 | 0.00324229 | MEOX2        | mesenchyme homeobox 2                                                                    |
| 52940_at       | 1.20436  | 0.00326529 | LOC100294402 | /// SIG single Ig IL-1-related receptor-like /// single immunoglobulin and toll-interleu |
| 203413_at      | -1.38638 | 0.00326879 | NELL2        | NEL-like 2 (chicken)                                                                     |
| 213059_at      | -1.27121 | 0.00329403 | CREB3L1      | cAMP responsive element binding protein 3-like 1                                         |
| 221577_x_at    | -1.36321 | 0.00330672 | GDF15        | growth differentiation factor 15                                                         |
| 214564_s_at    | -1.21875 | 0.00330837 | PCDHGC3      | protocadherin gamma subfamily C, 3                                                       |
| 205110_s_at    | 1.47278  | 0.00332707 | FGF13        | fibroblast growth factor 13                                                              |
| 204777_s_at    | 1.45357  | 0.00333572 | MAL          | mal, T-cell differentiation protein                                                      |
| 213790_at      | -1.27171 | 0.00334743 | ADAM12       | ADAM metalloproteinase domain 12                                                         |
| 209626_s_at    | -1.25517 | 0.00336315 | OSBPL3       | oxysterol binding protein-like 3                                                         |
| 216563_at      | -1.21507 | 0.00336315 | ANKRD12      | Ankyrin repeat domain 12                                                                 |
| 208960_s_at    | -1.21747 | 0.00337013 | KLF6         | Kruppel-like factor 6                                                                    |
| 202662_s_at    | -1.24442 | 0.00337013 | ITPR2        | inositol 1,4,5-triphosphate receptor, type 2                                             |
| 206089_at      | 1.3009   | 0.00337013 | NELL1        | NEL-like 1 (chicken)                                                                     |
| 201468_s_at    | 1.24274  | 0.00337013 | NQO1         | NAD(P)H dehydrogenase, quinone 1                                                         |
| 205403_at      | 1.40917  | 0.00337013 | IL1R2        | interleukin 1 receptor, type II                                                          |
| 204442_x_at    | -1.22798 | 0.00339941 | LTBP4        | latent transforming growth factor beta binding protein 4                                 |
| AFFX-BioC-5_at | -1.29479 | 0.00343086 | ---          | ---                                                                                      |
| 213524_s_at    | 1.28024  | 0.00343086 | G0S2         | G0/G1switch 2                                                                            |
| 204337_at      | 1.49578  | 0.00344955 | RGS4         | regulator of G-protein signaling 4                                                       |
| 205481_at      | -1.2652  | 0.00344955 | ADORA1       | adenosine A1 receptor                                                                    |
| 204081_at      | 1.40633  | 0.00346209 | NRGN         | neurogranin (protein kinase C substrate, RC3)                                            |
| 206710_s_at    | 1.35813  | 0.00348148 | EPB41L3      | erythrocyte membrane protein band 4.1-like 3                                             |
| AFFX-BioC-3_at | -1.29031 | 0.00348148 | ---          | ---                                                                                      |
| 209866_s_at    | -1.30501 | 0.00349926 | LPHN3        | latrophilin 3                                                                            |
| 205472_s_at    | 1.20145  | 0.00351282 | DACH1        | dachshund homolog 1 (Drosophila)                                                         |
| 214607_at      | 1.33815  | 0.00351403 | PAK3         | p21 protein (Cdc42/Rac)-activated kinase 3                                               |
| 215714_s_at    | -1.25302 | 0.00352166 | SMARCA4      | SWI/SNF related, matrix associated, actin dependent regulator of chromatin, subf         |
| 209071_s_at    | -1.26227 | 0.00352166 | RGS5         | regulator of G-protein signaling 5                                                       |
| 201430_s_at    | -1.23733 | 0.00354072 | DPYSL3       | dihydropyrimidinase-like 3                                                               |
| 204979_s_at    | 1.29139  | 0.00357269 | SH3BGR       | SH3 domain binding glutamic acid-rich protein                                            |
| 204338_s_at    | 1.27861  | 0.00358032 | RGS4         | regulator of G-protein signaling 4                                                       |
| 211776_s_at    | 1.31605  | 0.00358032 | EPB41L3      | erythrocyte membrane protein band 4.1-like 3                                             |
| 201615_x_at    | -1.23765 | 0.00358151 | CALD1        | caldesmon 1                                                                              |
| 212664_at      | 1.46373  | 0.00358151 | TUBB4        | tubulin, beta 4                                                                          |
| 221914_at      | 1.31584  | 0.00359377 | SYN1         | synapsin I                                                                               |
| 213107_at      | -1.22151 | 0.0036054  | TNIK         | TRAF2 and NCK interacting kinase                                                         |
| 214591_at      | -1.35966 | 0.00366952 | KLHL4        | kelch-like 4 (Drosophila)                                                                |
| 218418_s_at    | -1.20996 | 0.0036855  | KANK2        | KN motif and ankyrin repeat domains 2                                                    |
| 205471_s_at    | 1.22331  | 0.00371695 | DACH1        | dachshund homolog 1 (Drosophila)                                                         |
| 201325_s_at    | -1.26865 | 0.00371909 | EMP1         | epithelial membrane protein 1                                                            |
| 205363_at      | -1.37423 | 0.00371909 | BBOX1        | butyrobetaine (gamma), 2-oxoglutarate dioxygenase (gamma-butyrobetaine hydroxyla         |
| 205681_at      | 1.33616  | 0.00371909 | BCL2A1       | BCL2-related protein A1                                                                  |

|                     |          |            |                     |                                                                                  |
|---------------------|----------|------------|---------------------|----------------------------------------------------------------------------------|
| 210611_s_at         | -1.36267 | 0.00371909 | DTNA                | dystrobrevin, alpha                                                              |
| 210135_s_at         | -1.36335 | 0.00373189 | SHOX2               | short stature homeobox 2                                                         |
| 209685_s_at         | 1.30408  | 0.00373189 | PRKCB               | protein kinase C, beta                                                           |
| 209291_at           | -1.26794 | 0.0037515  | ID4                 | inhibitor of DNA binding 4, dominant negative helix-loop-helix protein           |
| 203932_at           | 1.27774  | 0.0038098  | HLA-DMB             | major histocompatibility complex, class II, DM beta                              |
| 219725_at           | 1.29175  | 0.00387977 | TREM2               | triggering receptor expressed on myeloid cells 2                                 |
| 216617_s_at         | 1.34071  | 0.00389558 | MAG                 | myelin associated glycoprotein                                                   |
| 211126_s_at         | -1.2389  | 0.00395371 | CSRP2               | cysteine and glycine-rich protein 2                                              |
| 213482_at           | 1.20364  | 0.00397225 | DOCK3               | dedicator of cytokinesis 3                                                       |
| 210736_x_at         | -1.20913 | 0.00409027 | DTNA                | dystrobrevin, alpha                                                              |
| 205128_x_at         | -1.29745 | 0.00410698 | PTGS1               | prostaglandin-endoperoxide synthase 1 (prostaglandin G/H synthase and cyclooxyge |
| 202286_s_at         | 1.21217  | 0.00413317 | TACSTD2             | tumor-associated calcium signal transducer 2                                     |
| 208430_s_at         | -1.24808 | 0.00413317 | DTNA                | dystrobrevin, alpha                                                              |
| 201971_s_at         | 1.23763  | 0.00414756 | ATP6V1A             | ATPase, H+ transporting, lysosomal 70kDa, V1 subunit A                           |
| 218847_at           | -1.35203 | 0.00417389 | IGF2BP2             | insulin-like growth factor 2 mRNA binding protein 2                              |
| 208396_s_at         | 1.21908  | 0.00424004 | PDE1A               | phosphodiesterase 1A, calmodulin-dependent                                       |
| 209789_at           | -1.21466 | 0.00424004 | CORO2B              | coronin, actin binding protein, 2B                                               |
| 213241_at           | 1.20166  | 0.00426001 | PLXNC1              | plexin C1                                                                        |
| 202073_at           | 1.21516  | 0.00426706 | OPTN                | optineurin                                                                       |
| 203416_at           | 1.2748   | 0.00428195 | CD53                | CD53 molecule                                                                    |
| 206404_at           | 1.27736  | 0.0042936  | FGF9                | fibroblast growth factor 9 (glia-activating factor)                              |
| \FFX-r2-Ec-bioC-5_a | -1.26989 | 0.00431311 | ---                 | ---                                                                              |
| 204232_at           | 1.29218  | 0.00433271 | FCER1G              | Fc fragment of IgE, high affinity I, receptor for; gamma polypeptide             |
| 206893_at           | -1.21081 | 0.00433271 | SALL1               | sal-like 1 (Drosophila)                                                          |
| 210139_s_at         | -1.20131 | 0.00433271 | PMP22               | peripheral myelin protein 22                                                     |
| 202669_s_at         | -1.26836 | 0.00434029 | EFNB2               | ephrin-B2                                                                        |
| 202712_s_at         | 1.23107  | 0.00438196 | CKMT1A /// CKMT1B   | creatine kinase, mitochondrial 1A /// creatine kinase, mitochondrial 1B          |
| 219415_at           | -1.3503  | 0.00444304 | TTYH1               | tweety homolog 1 (Drosophila)                                                    |
| 219779_at           | -1.24156 | 0.00444535 | ZFHX4               | zinc finger homeobox 4                                                           |
| 213197_at           | -1.26006 | 0.00453242 | ASTN1               | astrotactin 1                                                                    |
| 215870_s_at         | -1.53613 | 0.00454626 | PLA2G5              | phospholipase A2, group V                                                        |
| 215695_s_at         | -1.25803 | 0.00454626 | GYG2                | glycogenin 2                                                                     |
| 202688_at           | 1.30836  | 0.00454626 | TNFSF10             | tumor necrosis factor (ligand) superfamily, member 10                            |
| 205405_at           | -1.27713 | 0.00454626 | SEMA5A              | sema domain, seven thrombospondin repeats (type 1 and type 1-like), transmembran |
| 208443_x_at         | -1.23222 | 0.00459263 | SHOX2               | short stature homeobox 2                                                         |
| 206777_s_at         | -1.28162 | 0.00466177 | CRYBB2 /// CRYBB2P1 | crystallin, beta B2 /// crystallin, beta B2 pseudogene 1                         |
| 222379_at           | -1.27811 | 0.00466177 | KCNE4               | potassium voltage-gated channel, Isk-related family, member 4                    |
| 205364_at           | -1.23864 | 0.004685   | ACOX2               | acyl-CoA oxidase 2, branched chain                                               |
| 210091_s_at         | -1.28613 | 0.00471122 | DTNA                | dystrobrevin, alpha                                                              |
| 215123_at           | -1.2389  | 0.00477727 | NPIPL3              | nuclear pore complex interacting protein-like 3                                  |
| 214753_at           | -1.22455 | 0.00478083 | N4BP2L2             | NEDD4 binding protein 2-like 2                                                   |
| 216331_at           | -1.24254 | 0.00478083 | ITGA7               | integrin, alpha 7                                                                |
| 203797_at           | 1.61094  | 0.00490112 | VSNL1               | visinin-like 1                                                                   |
| 205053_at           | 1.2223   | 0.00490546 | PRIM1               | primase, DNA, polypeptide 1 (49kDa)                                              |
| 211161_s_at         | -1.50607 | 0.0049067  | COL3A1              | collagen, type III, alpha 1                                                      |
| 202178_at           | 1.3139   | 0.00492173 | PRKCZ               | protein kinase C, zeta                                                           |

|             |          |            |                |                                                                                  |
|-------------|----------|------------|----------------|----------------------------------------------------------------------------------|
| 210875_s_at | -1.265   | 0.00493817 | ZEB1           | zinc finger E-box binding homeobox 1                                             |
| 202132_at   | -1.24966 | 0.00500183 | WWTR1          | WW domain containing transcription regulator 1                                   |
| 205445_at   | 1.20196  | 0.00506264 | PRL            | prolactin                                                                        |
| 205568_at   | 1.29497  | 0.00509691 | AQP9           | aquaporin 9                                                                      |
| 220227_at   | -1.31582 | 0.00509691 | CDH4           | cadherin 4, type 1, R-cadherin (retinal)                                         |
| 205794_s_at | -1.20801 | 0.00510141 | NOVA1          | neuro-oncological ventral antigen 1                                              |
| 201261_x_at | -1.23397 | 0.00520718 | BGN            | biglycan                                                                         |
| 201043_s_at | -1.22045 | 0.00524033 | ANP32A         | acidic (leucine-rich) nuclear phosphoprotein 32 family, member A                 |
| 203445_s_at | -1.21253 | 0.00525084 | CTDSP2         | CTD (carboxy-terminal domain, RNA polymerase II, polypeptide A) small phosphatas |
| 209011_at   | -1.22589 | 0.00527944 | TRIO           | triple functional domain (PTPRF interacting)                                     |
| 222218_s_at | 1.20081  | 0.00530088 | PILRA          | paired immunoglobulin-like type 2 receptor alpha                                 |
| 216452_at   | -1.29485 | 0.00530186 | TRPM3          | transient receptor potential cation channel, subfamily M, member 3               |
| 217995_at   | 1.24766  | 0.00533406 | SQRDL          | sulfide quinone reductase-like (yeast)                                           |
| 219545_at   | -1.23008 | 0.00533522 | KCTD14         | potassium channel tetramerisation domain containing 14                           |
| 213676_at   | 1.20159  | 0.00534785 | TMEM151B       | transmembrane protein 151B                                                       |
| 209209_s_at | -1.22193 | 0.00542081 | FERMT2         | fermitin family member 2                                                         |
| 206026_s_at | -1.38092 | 0.00543648 | TNFAIP6        | tumor necrosis factor, alpha-induced protein 6                                   |
| 205931_s_at | -1.21145 | 0.00543648 | CREB5          | cAMP responsive element binding protein 5                                        |
| 204463_s_at | -1.27272 | 0.00546414 | EDNRA          | endothelin receptor type A                                                       |
| 206953_s_at | -1.2715  | 0.00552623 | LPHN2          | latrophilin 2                                                                    |
| 205259_at   | -1.2492  | 0.00552623 | NR3C2          | nuclear receptor subfamily 3, group C, member 2                                  |
| 205814_at   | 1.30672  | 0.00554812 | GRM3           | glutamate receptor, metabotropic 3                                               |
| 213593_s_at | -1.21327 | 0.00555489 | TRA2A          | transformer 2 alpha homolog (Drosophila)                                         |
| 211372_s_at | 1.23756  | 0.00559639 | IL1R2          | interleukin 1 receptor, type II                                                  |
| 209459_s_at | -1.26207 | 0.00560912 | ABAT           | 4-aminobutyrate aminotransferase                                                 |
| 210512_s_at | -1.30632 | 0.00561487 | VEGFA          | vascular endothelial growth factor A                                             |
| 221590_s_at | -1.20975 | 0.00561891 | ALDH6A1        | Aldehyde dehydrogenase 6 family, member A1                                       |
| 218826_at   | -1.20569 | 0.00568948 | SLC35F2        | solute carrier family 35, member F2                                              |
| 36711_at    | -1.27512 | 0.00577187 | MAFF           | v-maf musculoaponeurotic fibrosarcoma oncogene homolog F (avian)                 |
| 222024_s_at | -1.20629 | 0.00581066 | AKAP13         | A kinase (PRKA) anchor protein 13                                                |
| 206397_x_at | -1.26399 | 0.00581554 | GDF1 /// LASS1 | growth differentiation factor 1 /// LAG1 homolog, ceramide synthase 1            |
| 213109_at   | -1.23702 | 0.00581554 | TNIK           | TRAF2 and NCK interacting kinase                                                 |
| 202260_s_at | 1.2326   | 0.00581554 | STXBP1         | syntaxin binding protein 1                                                       |
| 221558_s_at | -1.24023 | 0.00581554 | LEF1           | lymphoid enhancer-binding factor 1                                               |
| 213451_x_at | -1.22642 | 0.00581554 | TNXA /// TNXB  | tenascin XA pseudogene /// tenascin XB                                           |
| 206574_s_at | -1.20355 | 0.00581554 | PTP4A3         | protein tyrosine phosphatase type IVA, member 3                                  |
| 203159_at   | 1.21649  | 0.00583526 | GLS            | glutaminase                                                                      |
| 205751_at   | 1.47623  | 0.00589703 | SH3GL2         | SH3-domain GRB2-like 2                                                           |
| 205479_s_at | -1.3112  | 0.00595748 | PLAU           | plasminogen activator, urokinase                                                 |
| 200770_s_at | -1.20441 | 0.00596532 | LAMC1          | laminin, gamma 1 (formerly LAMB2)                                                |
| 37005_at    | 1.20267  | 0.00600844 | NBL1           | neuroblastoma, suppression of tumorigenicity 1                                   |
| 204829_s_at | 1.30448  | 0.00607379 | FOLR2          | folate receptor 2 (fetal)                                                        |
| 219697_at   | 1.23764  | 0.00608866 | HS3ST2         | heparan sulfate (glucosamine) 3-O-sulfotransferase 2                             |
| 209293_x_at | -1.28515 | 0.00608932 | ID4            | inhibitor of DNA binding 4, dominant negative helix-loop-helix protein           |
| 204170_s_at | 1.25652  | 0.00611315 | CKS2           | CDC28 protein kinase regulatory subunit 2                                        |
| 203178_at   | -1.23299 | 0.00622515 | GATM           | glycine amidinotransferase (L-arginine:glycine amidinotransferase)               |

|             |          |            |                   |                                                                           |
|-------------|----------|------------|-------------------|---------------------------------------------------------------------------|
| 206018_at   | -1.33632 | 0.00625848 | FOXG1             | forkhead box G1                                                           |
| 213566_at   | 1.27109  | 0.00630127 | RNASE6            | ribonuclease, RNase A family, k6                                          |
| 204220_at   | 1.22407  | 0.00636805 | GMFG              | glia maturation factor, gamma                                             |
| 218353_at   | -1.25037 | 0.00638661 | RGS5              | regulator of G-protein signaling 5                                        |
| 209372_x_at | -1.23878 | 0.00646126 | TUBB2A /// TUBB2B | tubulin, beta 2A /// tubulin, beta 2B                                     |
| 205549_at   | 1.41063  | 0.00648646 | PCP4              | Purkinje cell protein 4                                                   |
| 205266_at   | -1.28886 | 0.00654782 | LIF               | leukemia inhibitory factor (cholinergic differentiation factor)           |
| 211302_s_at | -1.25913 | 0.00660579 | PDE4B             | phosphodiesterase 4B, cAMP-specific                                       |
| 200884_at   | -1.23465 | 0.00662849 | CKB               | creatine kinase, brain                                                    |
| 200714_x_at | -1.20624 | 0.00670728 | OS9               | osteosarcoma amplified 9, endoplasmic reticulum lectin                    |
| 219305_x_at | 1.21061  | 0.00672112 | FBXO2             | F-box protein 2                                                           |
| 208358_s_at | 1.46037  | 0.00677835 | UGT8              | UDP glycosyltransferase 8                                                 |
| 202369_s_at | -1.20271 | 0.00681868 | TRAM2             | translocation associated membrane protein 2                               |
| 203000_at   | 1.6491   | 0.00683576 | STMN2             | stathmin-like 2                                                           |
| 220115_s_at | -1.3722  | 0.00685316 | CDH10             | cadherin 10, type 2 (T2-cadherin)                                         |
| 205358_at   | -1.4158  | 0.00687114 | GRIA2             | glutamate receptor, ionotropic, AMPA 2                                    |
| 212414_s_at | -1.21485 | 0.00692109 | GLYR1 /// SEPT6   | glyoxylate reductase 1 homolog (Arabidopsis) /// septin 6                 |
| 206395_at   | -1.20462 | 0.0069379  | DGKG              | diacylglycerol kinase, gamma 90kDa                                        |
| 221911_at   | -1.2322  | 0.0069379  | ETV1              | ets variant 1                                                             |
| 217997_at   | -1.22669 | 0.00702246 | PHLDA1            | pleckstrin homology-like domain, family A, member 1                       |
| 206135_at   | 1.25405  | 0.00718589 | ST18              | suppression of tumorigenicity 18 (breast carcinoma) (zinc finger protein) |
| 208790_s_at | -1.22988 | 0.00723519 | PTRF              | polymerase I and transcript release factor                                |
| 208178_x_at | -1.22193 | 0.00723519 | TRIO              | triple functional domain (PTPRF interacting)                              |
| 211668_s_at | -1.29442 | 0.00725884 | PLAU              | plasminogen activator, urokinase                                          |
| 210738_s_at | -1.21922 | 0.00726439 | SLC4A4            | solute carrier family 4, sodium bicarbonate cotransporter, member 4       |
| 205483_s_at | 1.32696  | 0.00731426 | ISG15             | ISG15 ubiquitin-like modifier                                             |
| 216005_at   | -1.28186 | 0.00733044 | TNC               | Tenascin C                                                                |
| 209993_at   | -1.20642 | 0.00737521 | ABCB1             | ATP-binding cassette, sub-family B (MDR/TAP), member 1                    |
| 206580_s_at | -1.2515  | 0.00737521 | EFEMP2            | EGF-containing fibulin-like extracellular matrix protein 2                |
| 205660_at   | 1.22895  | 0.00741325 | OASL              | 2'-5'-oligoadenylate synthetase-like                                      |
| 201850_at   | 1.22638  | 0.00743906 | CAPG              | capping protein (actin filament), gelsolin-like                           |
| 206645_s_at | 1.3849   | 0.00743906 | NR0B1             | nuclear receptor subfamily 0, group B, member 1                           |
| 219147_s_at | 1.22365  | 0.00746613 | C9orf95           | chromosome 9 open reading frame 95                                        |

Supplementary Table 8. Genes differentially expressed in ovarian cancers with low FAT1 expression (TCGA dataset).

Wnt/ $\beta$ -catenin Signaling Components:

SFRP4, GJA1, MMP7, PPP2R2B, AKT3, FZD1

| <u>Probeset</u> | <u>Fold Change (FAT1low/FAT1nl)</u> | <u>q value</u> | <u>Gene Symbol</u> | <u>Gene Description</u>                                                                      |
|-----------------|-------------------------------------|----------------|--------------------|----------------------------------------------------------------------------------------------|
| 201579_at       | -2.00071                            | 0              | FAT1               | FAT tumor suppressor homolog 1 (Drosophila)<br><i>*FAT1 NOT INCLUDED IN PATHWAY ANALYSIS</i> |
| 213169_at       | -1.2663                             | 3.63E-16       | SEMA5A             | sema domain, seven thrombospondin repeats (type 1 and type 1-like), transmembran             |
| 215446_s_at     | -1.4214                             | 7.82E-16       | LOX                | lysyl oxidase                                                                                |
| 211675_s_at     | -1.29655                            | 8.16E-15       | MDFIC              | MyoD family inhibitor domain containing                                                      |
| 212473_s_at     | -1.27752                            | 1.09E-14       | MICAL2             | microtubule associated monooxygenase, calponin and LIM domain containing 2                   |
| 37892_at        | -1.78029                            | 1.66E-14       | COL11A1            | collagen, type XI, alpha 1                                                                   |
| 212472_at       | -1.24938                            | 2.62E-14       | MICAL2             | microtubule associated monooxygenase, calponin and LIM domain containing 2                   |
| 201150_s_at     | -1.3895                             | 4.34E-14       | TIMP3              | TIMP metalloproteinase inhibitor 3                                                           |
| 204451_at       | -1.22743                            | 4.34E-14       | FZD1               | frizzled homolog 1 (Drosophila)                                                              |
| 210809_s_at     | -1.79821                            | 5.55E-14       | POSTN              | periostin, osteoblast specific factor                                                        |
| 221730_at       | -1.47623                            | 7.32E-14       | COL5A2             | collagen, type V, alpha 2                                                                    |
| 221729_at       | -1.45438                            | 9.18E-14       | COL5A2             | collagen, type V, alpha 2                                                                    |
| 204620_s_at     | -1.47759                            | 1.32E-13       | VCAN               | versican                                                                                     |
| 221731_x_at     | -1.48918                            | 1.70E-13       | VCAN               | versican                                                                                     |
| 203083_at       | -1.47658                            | 2.68E-13       | THBS2              | thrombospondin 2                                                                             |
| 209487_at       | -1.27634                            | 3.17E-13       | RBPM5              | RNA binding protein with multiple splicing                                                   |
| 212488_at       | -1.4479                             | 3.54E-13       | COL5A1             | collagen, type V, alpha 1                                                                    |
| 204320_at       | -1.65046                            | 3.61E-13       | COL11A1            | collagen, type XI, alpha 1                                                                   |
| 212646_at       | -1.2351                             | 4.68E-13       | RFTN1              | raftlin, lipid raft linker 1                                                                 |
| 202202_s_at     | -1.24353                            | 4.79E-13       | LAMA4              | laminin, alpha 4                                                                             |
| 221541_at       | -1.33323                            | 1.00E-12       | CRISPLD2           | cysteine-rich secretory protein LCCL domain containing 2                                     |
| 221760_at       | -1.28787                            | 1.22E-12       | MAN1A1             | mannosidase, alpha, class 1A, member 1                                                       |
| 212489_at       | -1.38674                            | 1.43E-12       | COL5A1             | collagen, type V, alpha 1                                                                    |
| 205479_s_at     | -1.30764                            | 1.65E-12       | PLAU               | plasminogen activator, urokinase                                                             |
| 204619_s_at     | -1.38137                            | 1.87E-12       | VCAN               | versican                                                                                     |
| 213429_at       | -1.24224                            | 1.94E-12       | BICC1              | bicaudal C homolog 1 (Drosophila)                                                            |
| 219087_at       | -1.42718                            | 2.22E-12       | ASPN               | asporin                                                                                      |
| 201939_at       | -1.27444                            | 2.56E-12       | PLK2               | polo-like kinase 2                                                                           |
| 210511_s_at     | -1.34325                            | 4.54E-12       | INHBA              | inhibin, beta A                                                                              |
| 221942_s_at     | -1.28869                            | 5.19E-12       | GUCY1A3            | guanylate cyclase 1, soluble, alpha 3                                                        |
| 213338_at       | -1.32374                            | 6.78E-12       | TMEM158            | transmembrane protein 158 (gene/pseudogene)                                                  |
| 221911_at       | -1.22414                            | 7.59E-12       | ETV1               | ets variant 1                                                                                |
| 209955_s_at     | -1.34276                            | 8.11E-12       | FAP                | fibroblast activation protein, alpha                                                         |
| 203325_s_at     | -1.3449                             | 8.68E-12       | COL5A1             | collagen, type V, alpha 1                                                                    |



|             |          |          |         |                                                                                        |
|-------------|----------|----------|---------|----------------------------------------------------------------------------------------|
| 201963_at   | -1.22546 | 8.78E-12 | ACSL1   | acyl-CoA synthetase long-chain family member 1                                         |
| 213194_at   | -1.24577 | 1.20E-11 | ROBO1   | roundabout, axon guidance receptor, homolog 1 (Drosophila)                             |
| 211571_s_at | -1.34181 | 1.60E-11 | VCAN    | versican                                                                               |
| 204083_s_at | -1.23401 | 1.63E-11 | TPM2    | tropomyosin 2 (beta)                                                                   |
| 201645_at   | -1.32015 | 1.68E-11 | TNC     | tenascin C                                                                             |
| 202311_s_at | -1.37863 | 2.11E-11 | COL1A1  | collagen, type I, alpha 1                                                              |
| 215646_s_at | -1.37715 | 2.17E-11 | VCAN    | versican                                                                               |
| 203878_s_at | -1.36959 | 2.29E-11 | MMP11   | matrix metalloproteinase 11 (stromelysin 3)                                            |
| 210503_at   | 1.36722  | 2.51E-11 | MAGEA11 | melanoma antigen family A, 11                                                          |
| 202952_s_at | -1.23428 | 2.79E-11 | ADAM12  | ADAM metalloproteinase domain 12                                                       |
| 201438_at   | -1.3024  | 3.11E-11 | COL6A3  | collagen, type VI, alpha 3                                                             |
| 202310_s_at | -1.32813 | 3.46E-11 | COL1A1  | collagen, type I, alpha 1                                                              |
| 201069_at   | -1.30566 | 3.61E-11 | MMP2    | matrix metalloproteinase 2 (gelatinase A, 72kDa gelatinase, 72kDa type IV collagenase) |
| 211668_s_at | -1.31096 | 4.40E-11 | PLAU    | plasminogen activator, urokinase                                                       |
| 215076_s_at | -1.28982 | 4.47E-11 | COL3A1  | collagen, type III, alpha 1                                                            |
| 213139_at   | -1.29518 | 4.51E-11 | SNAI2   | snail homolog 2 (Drosophila)                                                           |
| 212667_at   | -1.26141 | 5.41E-11 | SPARC   | secreted protein, acidic, cysteine-rich (osteonectin)                                  |
| 211161_s_at | -1.32879 | 5.76E-11 | COL3A1  | collagen, type III, alpha 1                                                            |
| 203476_at   | -1.2876  | 5.86E-11 | TPBG    | trophoblast glycoprotein                                                               |
| 202465_at   | -1.26479 | 6.13E-11 | PCOLCE  | procollagen C-endopeptidase enhancer                                                   |
| 209047_at   | -1.21224 | 7.32E-11 | AQP1    | aquaporin 1 (Colton blood group)                                                       |
| 209156_s_at | -1.29953 | 8.73E-11 | COL6A2  | collagen, type VI, alpha 2                                                             |
| 201852_x_at | -1.35396 | 9.54E-11 | COL3A1  | collagen, type III, alpha 1                                                            |
| 204464_s_at | -1.23321 | 1.01E-10 | EDNRA   | endothelin receptor type A                                                             |
| 200974_at   | -1.29221 | 1.34E-10 | ACTA2   | actin, alpha 2, smooth muscle, aorta                                                   |
| 210495_x_at | -1.26586 | 1.44E-10 | FN1     | fibronectin 1                                                                          |
| 209488_s_at | -1.24676 | 1.45E-10 | RBPMS   | RNA binding protein with multiple splicing                                             |
| 202007_at   | -1.21084 | 1.50E-10 | NID1    | nidogen 1                                                                              |
| 209651_at   | -1.20703 | 1.86E-10 | TGFB1I1 | transforming growth factor beta 1 induced transcript 1                                 |
| 212464_s_at | -1.29908 | 2.09E-10 | FN1     | fibronectin 1                                                                          |
| 202620_s_at | -1.21291 | 2.45E-10 | PLOD2   | procollagen-lysine, 2-oxoglutarate 5-dioxygenase 2                                     |
| 216442_x_at | -1.26431 | 2.70E-10 | FN1     | fibronectin 1                                                                          |
| 202391_at   | -1.30175 | 2.70E-10 | BASP1   | brain abundant, membrane attached signal protein 1                                     |
| 209781_s_at | -1.25791 | 2.73E-10 | KHDRBS3 | KH domain containing, RNA binding, signal transduction associated 3                    |
| 202450_s_at | -1.35409 | 3.14E-10 | CTSK    | cathepsin K                                                                            |
| 213790_at   | -1.21562 | 3.16E-10 | ADAM12  | ADAM metalloproteinase domain 12                                                       |
| 202998_s_at | -1.22681 | 3.35E-10 | LOXL2   | lysyl oxidase-like 2                                                                   |
| 209621_s_at | -1.24411 | 3.38E-10 | PDLIM3  | PDZ and LIM domain 3                                                                   |
| 211719_x_at | -1.24504 | 3.64E-10 | FN1     | fibronectin 1                                                                          |
| 204457_s_at | -1.28262 | 4.38E-10 | GAS1    | growth arrest-specific 1                                                               |
| 204463_s_at | -1.2064  | 5.13E-10 | EDNRA   | endothelin receptor type A                                                             |
| 201108_s_at | -1.21567 | 5.22E-10 | THBS1   | thrombospondin 1                                                                       |
| 212607_at   | -1.21429 | 5.49E-10 | AKT3    | v-akt murine thymoma viral oncogene homolog 3 (protein kinase B, gamma)                |

|             |          |          |                |                                                                        |
|-------------|----------|----------|----------------|------------------------------------------------------------------------|
| 203180_at   | -1.23335 | 5.90E-10 | ALDH1A3        | aldehyde dehydrogenase 1 family, member A3                             |
| 201983_s_at | -1.23791 | 6.00E-10 | EGFR           | epidermal growth factor receptor                                       |
| 201148_s_at | -1.24077 | 6.21E-10 | TIMP3          | TIMP metalloproteinase inhibitor 3                                     |
| 204114_at   | -1.25251 | 8.09E-10 | NID2           | nidogen 2 (osteonidogen)                                               |
| 201792_at   | -1.28747 | 8.20E-10 | AEBP1          | AE binding protein 1                                                   |
| 208322_s_at | -1.2092  | 9.57E-10 | ST3GAL1        | ST3 beta-galactoside alpha-2,3-sialyltransferase 1                     |
| 209365_s_at | -1.20558 | 1.04E-09 | ECM1           | extracellular matrix protein 1                                         |
| 202619_s_at | -1.21652 | 1.23E-09 | PLOD2          | procollagen-lysine, 2-oxoglutarate 5-dioxygenase 2                     |
| 213909_at   | -1.33116 | 1.26E-09 | LRRC15         | leucine rich repeat containing 15                                      |
| 201615_x_at | -1.20199 | 1.32E-09 | CALD1          | caldesmon 1                                                            |
| 202766_s_at | -1.29329 | 1.46E-09 | FBN1           | fibrillin 1                                                            |
| 213428_s_at | -1.22084 | 1.72E-09 | COL6A1         | collagen, type VI, alpha 1                                             |
| 210764_s_at | -1.26501 | 1.75E-09 | CYR61          | cysteine-rich, angiogenic inducer, 61                                  |
| 213943_at   | -1.28027 | 1.81E-09 | TWIST1         | twist homolog 1 (Drosophila)                                           |
| 201149_s_at | -1.2584  | 1.87E-09 | TIMP3          | TIMP metalloproteinase inhibitor 3                                     |
| 201505_at   | -1.23228 | 2.38E-09 | LAMB1          | laminin, beta 1                                                        |
| 209309_at   | 1.22635  | 2.40E-09 | AZGP1          | alpha-2-glycoprotein 1, zinc-binding                                   |
| 203868_s_at | -1.32    | 2.71E-09 | VCAM1          | vascular cell adhesion molecule 1                                      |
| 208131_s_at | -1.28465 | 3.00E-09 | PTGIS          | prostaglandin I2 (prostacyclin) synthase                               |
| 201215_at   | -1.22351 | 5.10E-09 | PLS3           | plastin 3                                                              |
| 205941_s_at | -1.35155 | 5.28E-09 | COL10A1        | collagen, type X, alpha 1                                              |
| 203876_s_at | -1.24581 | 5.53E-09 | MMP11          | matrix metalloproteinase 11 (stromelysin 3)                            |
| 201289_at   | -1.22704 | 5.61E-09 | CYR61          | cysteine-rich, angiogenic inducer, 61                                  |
| 202157_s_at | -1.20561 | 5.86E-09 | CELF2          | CUGBP, Elav-like family member 2                                       |
| 202404_s_at | -1.2356  | 5.91E-09 | COL1A2         | collagen, type I, alpha 2                                              |
| 217428_s_at | -1.33874 | 6.96E-09 | COL10A1        | collagen, type X, alpha 1                                              |
| 201109_s_at | -1.21689 | 8.52E-09 | THBS1          | thrombospondin 1                                                       |
| 212353_at   | -1.36876 | 8.89E-09 | SULF1          | sulfatase 1                                                            |
| 219304_s_at | -1.2168  | 9.17E-09 | PDGFD          | platelet derived growth factor D                                       |
| 210394_x_at | 1.29296  | 1.09E-08 | SSX4 /// SSX4B | synovial sarcoma, X breakpoint 4 /// synovial sarcoma, X breakpoint 4B |
| 209596_at   | -1.23317 | 1.30E-08 | MXRA5          | matrix-remodelling associated 5                                        |
| 204298_s_at | -1.21455 | 1.31E-08 | LOX            | lysyl oxidase                                                          |
| 204135_at   | -1.21797 | 1.43E-08 | FILIP1L        | filamin A interacting protein 1-like                                   |
| 213764_s_at | -1.33648 | 1.46E-08 | MFAP5          | microfibrillar associated protein 5                                    |
| 211651_s_at | -1.20771 | 1.70E-08 | LAMB1          | laminin, beta 1                                                        |
| 207172_s_at | -1.25803 | 1.72E-08 | CDH11          | cadherin 11, type 2, OB-cadherin (osteoblast)                          |
| 211425_x_at | 1.25948  | 1.90E-08 | SSX4 /// SSX4B | synovial sarcoma, X breakpoint 4 /// synovial sarcoma, X breakpoint 4B |
| 37005_at    | -1.20589 | 1.96E-08 | NBL1           | neuroblastoma, suppression of tumorigenicity 1                         |
| 201744_s_at | -1.34908 | 1.99E-08 | LUM            | lumican                                                                |
| 201147_s_at | -1.29012 | 2.08E-08 | TIMP3          | TIMP metalloproteinase inhibitor 3                                     |
| 217430_x_at | -1.23753 | 2.13E-08 | COL1A1         | collagen, type I, alpha 1                                              |
| 212354_at   | -1.32937 | 3.84E-08 | SULF1          | sulfatase 1                                                            |
| 207808_s_at | -1.20639 | 5.22E-08 | PROS1          | protein S (alpha)                                                      |

|             |          |          |                        |                                                                                   |
|-------------|----------|----------|------------------------|-----------------------------------------------------------------------------------|
| 213765_at   | -1.26406 | 5.73E-08 | MFAP5                  | microfibrillar associated protein 5                                               |
| 215388_s_at | -1.20341 | 8.50E-08 | CFH /// CFHR1          | complement factor H /// complement factor H-related 1                             |
| 201667_at   | -1.21631 | 1.13E-07 | GJA1                   | gap junction protein, alpha 1, 43kDa                                              |
| 201110_s_at | -1.23083 | 1.17E-07 | THBS1                  | thrombospondin 1                                                                  |
| 203939_at   | -1.22621 | 1.24E-07 | NT5E                   | 5'-nucleotidase, ecto (CD73)                                                      |
| 204646_at   | -1.22757 | 1.36E-07 | DPYD                   | dihydropyrimidine dehydrogenase                                                   |
| 202068_s_at | -1.20973 | 1.72E-07 | LDLR                   | low density lipoprotein receptor                                                  |
| 203963_at   | -1.26475 | 1.98E-07 | CA12                   | carbonic anhydrase XII                                                            |
| 201431_s_at | -1.20748 | 2.26E-07 | DPYSL3                 | dihydropyrimidinase-like 3                                                        |
| 209335_at   | -1.25988 | 2.63E-07 | DCN                    | decorin                                                                           |
| 202283_at   | -1.27131 | 2.76E-07 | SERPINF1               | serpin peptidase inhibitor, clade F (alpha-2 antiplasmin, pigment epithelium der  |
| 207173_x_at | -1.273   | 2.84E-07 | CDH11                  | cadherin 11, type 2, OB-cadherin (osteoblast)                                     |
| 204955_at   | -1.22527 | 2.99E-07 | SRPX                   | sushi-repeat-containing protein, X-linked                                         |
| 205943_at   | -1.29207 | 3.02E-07 | TDO2                   | tryptophan 2,3-dioxygenase                                                        |
| 215867_x_at | -1.26498 | 4.68E-07 | CA12                   | carbonic anhydrase XII                                                            |
| 201952_at   | -1.20673 | 5.09E-07 | ALCAM                  | activated leukocyte cell adhesion molecule                                        |
| 204415_at   | 1.23289  | 5.43E-07 | IFI6                   | interferon, alpha-inducible protein 6                                             |
| 201694_s_at | -1.20124 | 5.69E-07 | EGR1                   | early growth response 1                                                           |
| 206439_at   | -1.29816 | 6.69E-07 | EPYC                   | epiphycan                                                                         |
| 202274_at   | -1.24481 | 6.79E-07 | ACTG2                  | actin, gamma 2, smooth muscle, enteric                                            |
| 201430_s_at | -1.20212 | 1.41E-06 | DPYSL3                 | dihydropyrimidinase-like 3                                                        |
| 205547_s_at | -1.25028 | 1.57E-06 | TAGLN                  | transgelin                                                                        |
| 214164_x_at | -1.23245 | 1.59E-06 | CA12                   | carbonic anhydrase XII                                                            |
| 203153_at   | 1.25322  | 1.76E-06 | IFIT1                  | interferon-induced protein with tetratricopeptide repeats 1                       |
| 221019_s_at | -1.20268 | 1.99E-06 | COLEC12                | collectin sub-family member 12                                                    |
| 202436_s_at | -1.23243 | 2.82E-06 | CYP1B1                 | cytochrome P450, family 1, subfamily B, polypeptide 1                             |
| 206772_at   | 1.30334  | 2.93E-06 | PTH2R                  | parathyroid hormone 2 receptor                                                    |
| 205206_at   | -1.22032 | 3.27E-06 | KAL1                   | Kallmann syndrome 1 sequence                                                      |
| 219778_at   | -1.21267 | 3.69E-06 | ZFPM2                  | zinc finger protein, multitype 2                                                  |
| 219873_at   | 1.26066  | 4.08E-06 | COLEC11                | collectin sub-family member 11                                                    |
| 213800_at   | -1.20375 | 4.93E-06 | CFH                    | complement factor H                                                               |
| 211896_s_at | -1.2615  | 4.97E-06 | DCN                    | decorin                                                                           |
| 212344_at   | -1.22528 | 5.16E-06 | SULF1                  | sulfatase 1                                                                       |
| 204052_s_at | -1.20718 | 5.64E-06 | SFRP4                  | secreted frizzled-related protein 4                                               |
| 211813_x_at | -1.23517 | 5.66E-06 | DCN                    | decorin                                                                           |
| 213849_s_at | -1.21304 | 6.14E-06 | PPP2R2B                | protein phosphatase 2, regulatory subunit B, beta                                 |
| 202437_s_at | -1.23629 | 6.34E-06 | CYP1B1                 | cytochrome P450, family 1, subfamily B, polypeptide 1                             |
| 201893_x_at | -1.229   | 6.83E-06 | DCN                    | decorin                                                                           |
| 207739_s_at | 1.35739  | 7.48E-06 | 2B /// GAGE2C /// GAG  | G antigen 1 /// G antigen 12F /// G antigen 12G /// G antigen 12I /// G antigen   |
| 204051_s_at | -1.24091 | 7.70E-06 | SFRP4                  | secreted frizzled-related protein 4                                               |
| 206640_x_at | 1.35027  | 8.22E-06 | GAGE12H /// GAGE12I    | G antigen 12C /// G antigen 12D /// G antigen 12E /// G antigen 12F /// G antigen |
| 208155_x_at | 1.33323  | 9.26E-06 | \GE12I /// GAGE12J /// | G antigen 1 /// G antigen 12F /// G antigen 12G /// G antigen 12I /// G antigen   |
| 202238_s_at | -1.26966 | 1.12E-05 | NNMT                   | nicotinamide N-methyltransferase                                                  |

|             |          |             |         |                                                             |
|-------------|----------|-------------|---------|-------------------------------------------------------------|
| 203074_at   | -1.20186 | 1.15E-05    | ANXA8L1 | annexin A8-like 1                                           |
| 202237_at   | -1.29428 | 1.21E-05    | NNMT    | nicotinamide N-methyltransferase                            |
| 207086_x_at | 1.32964  | 1.34E-05    | GAGE12J | G antigen 12C                                               |
| 208235_x_at | 1.33792  | 1.49E-05    | GAGE12I | G antigen 12G                                               |
| 209687_at   | -1.22141 | 1.64E-05    | CXCL12  | chemokine (C-X-C motif) ligand 12                           |
| 218002_s_at | -1.2542  | 2.09E-05    | CXCL14  | chemokine (C-X-C motif) ligand 14                           |
| 217073_x_at | 1.26517  | 2.74E-05    | APOA1   | apolipoprotein A-I                                          |
| 207663_x_at | 1.27854  | 3.43E-05    | GAGE3   | G antigen 3                                                 |
| 204450_x_at | 1.24718  | 4.36E-05    | APOA1   | apolipoprotein A-I                                          |
| 203824_at   | 1.26775  | 4.55E-05    | TSPAN8  | tetraspanin 8                                               |
| 211737_x_at | -1.25764 | 6.35E-05    | PTN     | pleiotrophin                                                |
| 214183_s_at | 1.29418  | 7.49E-05    | TKTL1   | transketolase-like 1                                        |
| 222242_s_at | -1.26119 | 8.65E-05    | KLK5    | kallikrein-related peptidase 5                              |
| 221872_at   | -1.25749 | 9.94E-05    | RARRES1 | retinoic acid receptor responder (tazarotene induced) 1     |
| 209242_at   | 1.23322  | 0.000111587 | PEG3    | paternally expressed 3                                      |
| 205932_s_at | 1.23114  | 0.000148396 | MSX1    | msh homeobox 1                                              |
| 220332_at   | -1.22083 | 0.000169388 | CLDN16  | claudin 16                                                  |
| 209466_x_at | -1.23302 | 0.000169567 | PTN     | pleiotrophin                                                |
| 204475_at   | -1.21194 | 0.00027477  | MMP1    | matrix metalloproteinase 1 (interstitial collagenase)       |
| 203820_s_at | 1.23101  | 0.000356858 | IGF2BP3 | insulin-like growth factor 2 mRNA binding protein 3         |
| 33767_at    | 1.20154  | 0.000637607 | NEFH    | neurofilament, heavy polypeptide                            |
| 203819_s_at | 1.25311  | 0.000677783 | IGF2BP3 | insulin-like growth factor 2 mRNA binding protein 3         |
| 204259_at   | -1.20935 | 0.000892523 | MMP7    | matrix metalloproteinase 7 (matrilysin, uterine)            |
| 206392_s_at | -1.21697 | 0.000917595 | RARRES1 | retinoic acid receptor responder (tazarotene induced) 1     |
| 205328_at   | -1.21865 | 0.00104182  | CLDN10  | claudin 10                                                  |
| 213880_at   | 1.21055  | 0.00590003  | LGR5    | leucine-rich repeat-containing G protein-coupled receptor 5 |

**Supplementary Table 9. Sequencing primers and siRNA sequences.**

**FAT1 SEQUENCING PRIMERS**

| gene | target pos               | primer name                             | seq                     | primer pos               | size |
|------|--------------------------|-----------------------------------------|-------------------------|--------------------------|------|
| FAT1 | chr4:187746691-187747070 | FAT_481804_L_14563820_chr4_187746593_2C | ACAGCCGATGAAAACCTCAC    | chr4:187746542-187746562 | 712  |
| FAT1 | chr4:187746691-187747070 | FAT_481804_R_14563821_chr4_187747976_2C | CGCCATCGATACGGACTATT    | chr4:187747234-187747254 | 712  |
| FAT1 | chr4:187747071-187747368 | FAT_481805_L_12913012_chr4_187746779_2C | ATCATGACCTCGGACTCCAC    | chr4:187746825-187746845 | 705  |
| FAT1 | chr4:187747071-187747368 | FAT_481805_R_12913013_chr4_187748148_2C | GGGGATGTCTTCAAAGCAAA    | chr4:187747510-187747530 | 705  |
| FAT1 | chr4:187753836-187753974 | FAT_481800_L_12212434_chr4_187753676_2C | CAGTTTGGCTATTTTCCCCA    | chr4:187753656-187753676 | 411  |
| FAT1 | chr4:187753836-187753974 | FAT_481800_R_12212435_chr4_187754457_2C | ATCGTTGGGTAATGCATGGT    | chr4:187754047-187754067 | 411  |
| FAT1 | chr4:187754687-187755067 | FAT_481796_L_chr4_187754606             | cacacatttgactggacaga    |                          |      |
| FAT1 | chr4:187754687-187755067 | FAT_481796_R_chr4_187755148             | ggaaggaattggaatcgttg    |                          |      |
| FAT1 | chr4:187755068-187755379 | FAT_481797_L_12115704_chr4_187754788_2C | AAAGTGCTGAATTCGGGATG    | chr4:187754828-187754848 | 691  |
| FAT1 | chr4:187755068-187755379 | FAT_481797_R_12115705_chr4_187756129_2C | TGCAGTACACATTCATTGTTT   | chr4:187755499-187755519 | 691  |
| FAT1 | chr4:187755829-187755940 | FAT_481795_L_14754562_chr4_187755387_2C | ATGTGATCGCATGCTTTTGA    | chr4:187755508-187755528 | 746  |
| FAT1 | chr4:187755829-187755940 | FAT_481795_R_14754563_chr4_187756838_2C | GCCTTGTACATAGGGACCCA    | chr4:187756234-187756254 | 746  |
| FAT1 | chr4:187756119-187756273 | FAT_481794_L_13605292_chr4_187755617_2C | TCTCCAGTCAATATGACGC     | chr4:187755768-187755788 | 670  |
| FAT1 | chr4:187756119-187756273 | FAT_481794_R_13605293_chr4_187756916_2C | GCAAGTGAAGGCTTGTGTAT    | chr4:187756418-187756438 | 670  |
| FAT1 | chr4:187758045-187758425 | FAT_481792_L_13757780_chr4_187757573_2C | AAGGGCTAAGCGGTACGAAT    | chr4:187757709-187757729 | 1012 |
| FAT1 | chr4:187758045-187758425 | FAT_481792_R_13757781_chr4_187759556_2C | TGCTTTGTGGATGTGCATTT    | chr4:187758701-187758721 | 1012 |
| FAT1 | chr4:187758426-187758508 | FAT_481793_L_12036490_chr4_187758154_2C | GCTCCAGCCATCAAAATAA     | chr4:187758190-187758210 | 410  |
| FAT1 | chr4:187758426-187758508 | FAT_481793_R_12036491_chr4_187758933_2C | CTCCCTAAGCCCTCTCTGT     | chr4:187758580-187758600 | 410  |
| FAT1 | chr4:187759416-187759574 | FAT_481791_L_14963680_chr4_187759130_2C | TGGGGCATCACCTAGAGTTT    | chr4:187759173-187759193 | 576  |
| FAT1 | chr4:187759416-187759574 | FAT_481791_R_14963681_chr4_187760241_2C | GTCTATGCTGGGCTTTTCAT    | chr4:187759729-187759749 | 576  |
| FAT1 | chr4:187761050-187761182 | FAT_481790_L_chr4_187760906             | gtcattcttttcatctccaca   |                          |      |
| FAT1 | chr4:187761050-187761182 | FAT_481790_R_chr4_187761299             | tcgggtcacagatggttcc     |                          |      |
| FAT1 | chr4:187761323-187761703 | FAT_481787_L_12578482_chr4_187761221_2C | GCACCTTCCCTTTCATTCA     | chr4:187761172-187761192 | 714  |
| FAT1 | chr4:187761323-187761703 | FAT_481787_R_12578483_chr4_187762608_2C | GCAAGCTGATAGCACACAAA    | chr4:187761866-187761886 | 714  |
| FAT1 | chr4:187761704-187762083 | FAT_481788_L_12704592_chr4_187761698_2C | ATGTGGGTGAGGTTCAAGAG    | chr4:187761601-187761621 | 784  |
| FAT1 | chr4:187761704-187762083 | FAT_481788_R_12704593_chr4_187763225_2C | ACCTTCCATTTTATCCCGC     | chr4:187762365-187762385 | 784  |
| FAT1 | chr4:187762084-187762125 | FAT_481789_L_13369146_chr4_187761848_2C | TGTGTGCTATCAGCTTGCC     | chr4:187761866-187761886 | 519  |
| FAT1 | chr4:187762084-187762125 | FAT_481789_R_13369147_chr4_187762845_2C | ACCTTCCATTTTATCCCGC     | chr4:187762365-187762385 | 519  |
| FAT1 | chr4:187762524-187762722 | FAT_481786_L_14904920_chr4_187762406_2C | GCGGGATAAAAATGGAAGGT    | chr4:187762365-187762385 | 412  |
| FAT1 | chr4:187762524-187762722 | FAT_481786_R_14904921_chr4_187763189_2C | AGATTTGGCTGTGTCCAGG     | chr4:187762757-187762777 | 412  |
| FAT1 | chr4:187764217-187764361 | FAT_481785_L_12880222_chr4_187764017_2C | ATCAAAGCACGGAAAGGAAA    | chr4:187764017-187764037 | 417  |
| FAT1 | chr4:187764217-187764361 | FAT_481785_R_12880223_chr4_187764810_2C | GGAGGACACTCTTCATTGGA    | chr4:187764414-187764434 | 417  |
| FAT1 | chr4:187767330-187767468 | FAT_481784_L_13647052_chr4_187767282_2C | TGTTGCCGTGATCTTCTGAG    | chr4:187767206-187767226 | 612  |
| FAT1 | chr4:187767330-187767468 | FAT_481784_R_13647053_chr4_187768465_2C | AGGCCAACCTGATGCTGACT    | chr4:187767798-187767818 | 612  |
| FAT1 | chr4:187767948-187768163 | FAT_481783_L_14614084_chr4_187767848_2C | AGTCAAGCACTAGTGGCCCT    | chr4:187767798-187767818 | 557  |
| FAT1 | chr4:187767948-187768163 | FAT_481783_R_14614085_chr4_187768921_2C | ATAAAGATCCAGGGATGGCC    | chr4:187768335-187768355 | 557  |
| FAT1 | chr4:187769533-187769913 | FAT_481781_L_12162112_chr4_187769381_2C | CTGAAGCCTCCAAACAACA     | chr4:187769357-187769377 | 578  |
| FAT1 | chr4:187769533-187769913 | FAT_481781_R_12162113_chr4_187770492_22 | TGCTTTCATAGGATTAATCCG   | chr4:187769913-187769933 | 578  |
| FAT1 | chr4:187771256-187771490 | FAT_481780_L_13111142_chr4_187771064_2C | ACTGGGCAACTTTGGGAAC     | chr4:187771060-187771080 | 613  |
| FAT1 | chr4:187771256-187771490 | FAT_481780_R_13111143_chr4_187772249_2C | TTGAGACCTGGAGCTCACT     | chr4:187771653-187771673 | 613  |
| FAT1 | chr4:187772338-187772492 | FAT_481779_L_chr4_187772280             | cccacatatgatcattgtggaat |                          |      |
| FAT1 | chr4:187772338-187772492 | FAT_481779_R_chr4_187772546             | tttgtgctgctgttaatgc     |                          |      |
| FAT1 | chr4:187775152-187775349 | FAT_481778_L_12435872_chr4_187774694_2C | TGTTTCCCCTCAGATCCTTC    | chr4:187774823-187774843 | 702  |
| FAT1 | chr4:187775152-187775349 | FAT_481778_R_12435873_chr4_187776057_2C | AATGCTGCCCTGTTTTTGT     | chr4:187775505-187775525 | 702  |
| FAT1 | chr4:187775855-187776235 | FAT_481767_L_15342952_chr4_187775355_2C | ACAAAACAAGGGCAGCATT     | chr4:187775505-187775525 | 1029 |
| FAT1 | chr4:187775855-187776235 | FAT_481767_R_15342953_chr4_187777372_2C | TTTACAGCTGCTCAAAGGG     | chr4:187776514-187776534 | 1029 |
| FAT1 | chr4:187776236-187776615 | FAT_481768_L_14806600_chr4_187776076_2C | CCATGATCTGATGCAACCAC    | chr4:187776056-187776076 | 733  |
| FAT1 | chr4:187776236-187776615 | FAT_481768_R_14806601_chr4_187777501_2C | ACAAACTGTCGGCGTAATC     | chr4:187776769-187776789 | 733  |
| FAT1 | chr4:187776616-187776995 | FAT_481769_L_13101536_chr4_187776110_2C | CCTGGCAGGTTTCAACAAT     | chr4:187776263-187776283 | 756  |
| FAT1 | chr4:187776616-187776995 | FAT_481769_R_13101537_chr4_187777581_2C | TGTGGGAGGAAAGTGTCTT     | chr4:187776999-187777019 | 756  |
| FAT1 | chr4:187776996-187777375 | FAT_481770_L_13605352_chr4_187776738_2C | GTGATTACGCCGACAGTTT     | chr4:187776767-187776787 | 862  |
| FAT1 | chr4:187776996-187777375 | FAT_481770_R_13605353_chr4_187778421_2C | CGCTGAGCAGTGATGTGATT    | chr4:187777609-187777629 | 862  |
| FAT1 | chr4:187777376-187777755 | FAT_481771_L_14401410_chr4_187777332_2C | GAAGGAAAGCAGGACTGTGC    | chr4:187777254-187777274 | 623  |
| FAT1 | chr4:187777376-187777755 | FAT_481771_R_14401411_chr4_187778537_2C | GTCTTATGCGGTGACCCTGT    | chr4:18777857-18777877   | 623  |
| FAT1 | chr4:18777756-187778135  | FAT_481772_L_chr4_187777703             | agtgagatgaggccagtgtct   |                          |      |
| FAT1 | chr4:18777756-187778135  | FAT_481772_R_chr4_187778204             | aagccatgctgtgttga       |                          |      |
| FAT1 | chr4:18778136-18778515   | FAT_481773_L_13377906_chr4_187777778_2C | ACAGGGTACCGCATAAGAC     | chr4:18777857-18777877   | 804  |
| FAT1 | chr4:18778136-18778515   | FAT_481773_R_13377907_chr4_187779345_2C | TAAAGCCGACTTCAGGAGTT    | chr4:18778641-18778661   | 804  |
| FAT1 | chr4:18778516-18778895   | FAT_481774_L_14022840_chr4_18777972_2C  | ACCTGGATGCTCTCTGCAAT    | chr4:18778144-18778164   | 793  |
| FAT1 | chr4:18778516-18778895   | FAT_481774_R_14022841_chr4_187779517_2C | CTGTGTCTCTCACTGCCAA     | chr4:18778917-18778937   | 793  |
| FAT1 | chr4:18778896-18779275   | FAT_481775_L_11897100_chr4_18778586_2C  | AACTCTGAAGTGGCGCTTA     | chr4:18778641-18778661   | 751  |
| FAT1 | chr4:18778896-18779275   | FAT_481775_R_11897101_chr4_187780047_2C | CAGCGTGGCTCAACAGACA     | chr4:18779372-18779392   | 751  |
| FAT1 | chr4:18779276-18779655   | FAT_481776_L_14833420_chr4_18778758_2C  | TTGACAGTGAGAGCACACAG    | chr4:18778917-18778937   | 780  |
| FAT1 | chr4:18779276-18779655   | FAT_481776_R_14833421_chr4_187780277_2C | GTCAGCATTGGGAGTTTCTG    | chr4:18779677-18779697   | 780  |
| FAT1 | chr4:18779656-18779923   | FAT_481777_L_13644340_chr4_187779288_2C | GTCTTGTAGGACACACGCTG    | chr4:18779372-18779392   | 909  |
| FAT1 | chr4:18779656-18779923   | FAT_481777_R_13644341_chr4_187781065_2C | TGAGGGACTCTGGAAGTGTG    | chr4:187780261-187780281 | 909  |
| FAT1 | chr4:187786301-187786512 | FAT_481766_L_chr4_187786212             | tgcttcaatcaccagaactga   |                          |      |
| FAT1 | chr4:187786301-187786512 | FAT_481766_R_chr4_187786601             | gtcctgagccttgtgtgt      |                          |      |
| FAT1 | chr4:187786635-187786911 | FAT_481765_L_13640742_chr4_187786233_2C | TTCCCTTGTCTTGTCCAG      | chr4:187786334-187786354 | 894  |
| FAT1 | chr4:187786635-187786911 | FAT_481765_R_13640743_chr4_187787980_2C | TACCTTCTGTGGAGGCGT      | chr4:187787208-187787228 | 894  |
| FAT1 | chr4:187791831-187791971 | FAT_481764_L_13285988_chr4_187791815_2C | TTTAGACCTCACAGGGCAG     | chr4:187791723-187791743 | 386  |
| FAT1 | chr4:187791831-187791971 | FAT_481764_R_13285989_chr4_187792546_2C | TTCAAAATGCTCTCTTTGG     | chr4:187792089-187792109 | 386  |
| FAT1 | chr4:187794172-187794383 | FAT_481763_L_14714880_chr4_187794208_2C | TTCGGCCCAAAATCATCAA     | chr4:187794090-187794110 | 499  |
| FAT1 | chr4:187794172-187794383 | FAT_481763_R_14714881_chr4_187795165_2C | ACGTTTGAGAAATCAGGGTGC   | chr4:187794569-187794589 | 499  |
| FAT1 | chr4:187794732-187795062 | FAT_481762_L_15403118_chr4_187794360_2C | TGAAGCACAGACTGGTTTGG    | chr4:187794446-187794466 | 790  |

|      |                          |                                         |                      |                          |      |
|------|--------------------------|-----------------------------------------|----------------------|--------------------------|------|
| FAT1 | chr4:187794732-187795062 | FAT_481762_R_15403119_chr4_187795899_2C | CTGCCTCACCTCCTACAGC  | chr4:187795216-187795236 | 790  |
| FAT1 | chr4:187797869-187797931 | FAT_481761_L_11997672_chr4_187797689_2C | GGGATAAAGGGGACAAGAGC | chr4:187797679-187797699 | 337  |
| FAT1 | chr4:187797869-187797931 | FAT_481761_R_11997673_chr4_187798322_2C | cctgccAAGAGTGTGATTT  | chr4:187797996-187798016 | 337  |
| FAT1 | chr4:187821446-187821761 | FAT_481760_L_13740372_chr4_187821300_2C | tgtgccgctTGTGCTAAAT  | chr4:187821273-187821293 | 527  |
| FAT1 | chr4:187821446-187821761 | FAT_481760_R_13740373_chr4_187822313_2C | TTGATGTCTGCTTTACGCT  | chr4:187821780-187821800 | 527  |
| FAT1 | chr4:187864710-187865090 | FAT_481751_L_chr4_187864677             | gggcatcaaatgagagcaat |                          |      |
| FAT1 | chr4:187864710-187865090 | FAT_481751_R_chr4_187865159             | tcttccagaaggaaccgtca |                          |      |
| FAT1 | chr4:187865091-187865470 | FAT_481752_L_14537140_chr4_187864587_2C | AACGCCAGACCCATCTCTAA | chr4:187864739-187864759 | 784  |
| FAT1 | chr4:187865091-187865470 | FAT_481752_R_14537141_chr4_187866114_2C | TCCACCCGAGTTTTACAGG  | chr4:187865503-187865523 | 784  |
| FAT1 | chr4:187865471-187865850 | FAT_481753_L_14256200_chr4_187865001_2C | ATGATGACGGTTCCTCTGG  | chr4:187865136-187865156 | 784  |
| FAT1 | chr4:187865471-187865850 | FAT_481753_R_14256201_chr4_187866528_2C | AGCTCCTGCAGGCAAATAA  | chr4:187865900-187865920 | 784  |
| FAT1 | chr4:187865851-187866230 | FAT_481754_L_13285980_chr4_187865497_2C | TGGGGTATCCCAAGTCAAT  | chr4:187865574-187865594 | 681  |
| FAT1 | chr4:187865851-187866230 | FAT_481754_R_13285981_chr4_187866818_2C | TGAAGGGACAATCCAGAG   | chr4:187866235-187866255 | 681  |
| FAT1 | chr4:187866231-187866610 | FAT_481755_L_13174894_chr4_187866113_2C | CCTAAGCCATCCATTAGCGA | chr4:187866072-187866092 | 771  |
| FAT1 | chr4:187866231-187866610 | FAT_481755_R_13174895_chr4_187867614_2C | ATTTGCTCTCCCAACACAC  | chr4:187866823-187866843 | 771  |
| FAT1 | chr4:187866611-187866990 | FAT_481756_L_14034424_chr4_187866059_2C | CTCTGGGAATTTGCCCTTCA | chr4:187866235-187866255 | 1064 |
| FAT1 | chr4:187866611-187866990 | FAT_481756_R_14034425_chr4_187868146_2C | CCGTGGCATGAAGTTGTATG | chr4:187867279-187867299 | 1064 |
| FAT1 | chr4:187866991-187867370 | FAT_481757_L_13316796_chr4_187866855_2C | GTGTGTTGGGAGGAGCAAT  | chr4:187866823-187866843 | 929  |
| FAT1 | chr4:187866991-187867370 | FAT_481757_R_13316797_chr4_187868672_2C | TTCCGGAGACAGTGAACACC | chr4:187867732-187867752 | 929  |
| FAT1 | chr4:187867371-187866990 | FAT_481758_L_13006022_chr4_187867387_2C | CATCAACTTGCACCCAGG   | chr4:187867279-187867299 | 629  |
| FAT1 | chr4:187867371-187867750 | FAT_481758_R_13006023_chr4_187868604_2C | CAGCCAACGACTGAACAGA  | chr4:187867888-187867908 | 629  |
| FAT1 | chr4:187867751-187867993 | FAT_481759_L_11986922_chr4_187867185_2C | ACACCCTGTTGGGTGAAT   | chr4:187867368-187867388 | 662  |
| FAT1 | chr4:187867751-187867993 | FAT_481759_R_11986923_chr4_187868468_2C | TCCCAAGTAAACGATTCTG  | chr4:187868010-187868030 | 662  |

**AXIN1 SEQUENCING PRIMERS**

|       |                     |                                         |                      |                     |     |
|-------|---------------------|-----------------------------------------|----------------------|---------------------|-----|
| AXIN1 | chr16:277821-278200 | AXIN1_391591_L_13151152_chr16_277407_2C | TCGCATGAAAAACAGACTCG | chr16:277514-277534 | 714 |
| AXIN1 | chr16:277821-278200 | AXIN1_391591_R_13151153_chr16_278794_2C | GACGAGTTTGACTGTGGGGT | chr16:278208-278228 | 714 |
| AXIN1 | chr16:278201-278249 | AXIN1_391592_L_14698552_chr16_277945_20 | CCTGCCTTAGACACGGGTA  | chr16:277973-277993 | 653 |
| AXIN1 | chr16:278201-278249 | AXIN1_391592_R_14698553_chr16_279210_20 | ACTGCAGATGTGTGCTGAG  | chr16:278606-278626 | 653 |
| AXIN1 | chr16:279440-279608 | AXIN1_391588_L_13185032_chr16_278850_20 | AGGGACATGAGCTGAAATGG | chr16:279045-279065 | 863 |
| AXIN1 | chr16:279440-279608 | AXIN1_391588_R_13185033_chr16_280535_20 | ACTCCTAGAGGTGGGAGCTG | chr16:279888-279908 | 863 |
| AXIN1 | chr16:281190-281298 | AXIN1_391587_L_13193442_chr16_281018_20 | TGATGGAGACAGGAGAAGGC | chr16:281004-281024 | 638 |
| AXIN1 | chr16:281190-281298 | AXIN1_391587_R_13193443_chr16_282253_20 | CTGAAGGACAGACTCTCGGG | chr16:281622-281642 | 638 |
| AXIN1 | chr16:283488-283719 | AXIN1_391585_L_12593270_chr16_283490_20 | CGTTTTCCCTGAAGACCT   | chr16:283389-283409 | 435 |
| AXIN1 | chr16:283488-283719 | AXIN1_391585_R_12593271_chr16_284319_20 | TCCTATCCCTCAAGGAGGCT | chr16:283804-283824 | 435 |
| AXIN1 | chr16:287056-287227 | AXIN1_L_chr16_286959                    | actgccacacactgaag    |                     |     |
| AXIN1 | chr16:287056-287227 | AXIN1_R_chr16_287324                    | gagccttccagatgccagga |                     |     |
| AXIN1 | chr16:287722-288102 | AXIN1_391579_L_13811030_chr16_287442_20 | CTGAAGACTGAGGGCCAGAG | chr16:287482-287502 | 813 |
| AXIN1 | chr16:287722-288102 | AXIN1_391579_R_13811031_chr16_289027_20 | AGCTGGTGTGAGAGGTGAT  | chr16:288275-288295 | 813 |
| AXIN1 | chr16:288103-288252 | AXIN1_391580_L_15482688_chr16_287987_20 | CCTGACTTGGGTACGTGCTT | chr16:287945-287965 | 350 |
| AXIN1 | chr16:288103-288252 | AXIN1_391580_R_15482689_chr16_288646_20 | AGCTGGTGTGAGAGGTGAT  | chr16:288275-288295 | 350 |
| AXIN1 | chr16:294304-294442 | AXIN1_391577_L_15388808_chr16_293936_20 | GATCAGGTACACAGAGGCA  | chr16:294020-294040 | 499 |
| AXIN1 | chr16:294304-294442 | AXIN1_391577_R_15388809_chr16_294893_20 | CGCTCTTCCCTTCAAAAG   | chr16:294499-294519 | 499 |
| AXIN1 | chr16:299973-300070 | AXIN1_391575_L_13900960_chr16_299585_20 | ATCCACCTTCAAGGCAAG   | chr16:299679-299699 | 600 |
| AXIN1 | chr16:299973-300070 | AXIN1_391575_R_13900961_chr16_300744_20 | CCATCACGTGTGAACCTTTG | chr16:300259-300279 | 600 |
| AXIN1 | chr16:304543-304684 | AXIN1_391573_L_12009682_chr16_304537_20 | CTGGGGCAGGACTTACACAT | chr16:304440-304460 | 409 |
| AXIN1 | chr16:304543-304684 | AXIN1_391573_R_12009683_chr16_305314_20 | AGGACAGTGGAGATGTTGG  | chr16:304829-304849 | 409 |
| AXIN1 | chr16:336148-336528 | AXIN1_391567_L_14279324_chr16_335586_20 | AAACGCTCACTCCCTCTTT  | chr16:335767-335787 | 914 |
| AXIN1 | chr16:336148-336528 | AXIN1_391567_R_14279325_chr16_337373_20 | ACTTCTGGTTGCTGCACT   | chr16:336661-336681 | 914 |
| AXIN1 | chr16:336529-336908 | AXIN1_391568_L_13692222_chr16_336551_20 | TTTTCTCCATAGTGCCCTG  | chr16:336440-336460 | 601 |
| AXIN1 | chr16:336529-336908 | AXIN1_391568_R_13692223_chr16_337712_20 | CGCAGAGTCCCAAATGAAT  | chr16:337021-337041 | 601 |
| AXIN1 | chr16:336909-337107 | AXIN1_391569_L_13518716_chr16_336811_20 | CAGTGACTCAGCCACTTCA  | chr16:336760-336780 | 582 |
| AXIN1 | chr16:336909-337107 | AXIN1_391569_R_13518717_chr16_337934_20 | GGCATCCCTTCTAGCATGA  | chr16:337322-337342 | 582 |

**AXIN2 SEQUENCING PRIMERS**

|       |                         |                                           |                      |                         |     |
|-------|-------------------------|-------------------------------------------|----------------------|-------------------------|-----|
| AXIN2 | chr17:60956285-60956664 | AXIN2_391627_L_14079610_chr17_60956025_20 | GAAACCATGAACGCACTCCT | chr17:60956055-60956075 | 715 |
| AXIN2 | chr17:60956285-60956664 | AXIN2_391627_R_14079611_chr17_60957414_20 | CCTCAGTCCTCCATGTTGGT | chr17:60956750-60956770 | 715 |
| AXIN2 | chr17:60956665-60956682 | AXIN2_391628_L_12513642_chr17_60956367_20 | CACTGGCCGATCTTCTTCA  | chr17:60956416-60956436 | 354 |
| AXIN2 | chr17:60956665-60956682 | AXIN2_391628_R_12513643_chr17_60957034_20 | CCTCAGTCCTCATGTTGGT  | chr17:60956750-60956770 | 354 |
| AXIN2 | chr17:60960491-60960659 | AXIN2_391622_L_12304952_chr17_60959893_20 | AATCAGTGTGCCTGTCCCTC | chr17:60960092-60960112 | 958 |
| AXIN2 | chr17:60960491-60960659 | AXIN2_391622_R_12304953_chr17_60961768_20 | TCTCCAATCCAGGTGAGACC | chr17:60961030-60961050 | 958 |
| AXIN2 | chr17:60962205-60962301 | AXIN2_391620_L_15193568_chr17_60961739_20 | GCTCAGGGGTGACAAATGTT | chr17:60961872-60961892 | 569 |
| AXIN2 | chr17:60962205-60962301 | AXIN2_391620_R_15193569_chr17_60962836_20 | GCTTGTGGTGGTCTCCGTA  | chr17:60962421-60962441 | 569 |
| AXIN2 | chr17:60962899-60963133 | AXIN2_391618_L_chr17_60962780             | tcttctggaggagggtttg  |                         |     |
| AXIN2 | chr17:60962899-60963133 | AXIN2_391618_R_chr17_60963279             | gcactgacctgttcatgt   |                         |     |
| AXIN2 | chr17:60963448-60963643 | AXIN2_391617_L_13858280_chr17_60963482_20 | ACTGCAAAAACAGCCATTCC | chr17:60963365-60963385 | 445 |
| AXIN2 | chr17:60963448-60963643 | AXIN2_391617_R_13858281_chr17_60964331_20 | TAGTTTCTAAGAGGGCGGCA | chr17:60963790-60963810 | 445 |
| AXIN2 | chr17:60963903-60964283 | AXIN2_391613_L_12301702_chr17_60963877_20 | TGCCCCCTTAGAAACTA    | chr17:60963790-60963810 | 671 |
| AXIN2 | chr17:60963903-60964283 | AXIN2_391613_R_12301703_chr17_60965178_20 | TTCTGCTTCTGGGTCACTT  | chr17:60964441-60964461 | 671 |
| AXIN2 | chr17:60964284-60964415 | AXIN2_391614_L_13046272_chr17_60964274_20 | GGAGTGTACTGCGAATGTT  | chr17:60964179-60964199 | 595 |
| AXIN2 | chr17:60964284-60964415 | AXIN2_391614_R_13046273_chr17_60965423_20 | CCTAGGCCCTTCTCTGCTT  | chr17:60964754-60964774 | 595 |
| AXIN2 | chr17:60964782-60964923 | AXIN2_391611_L_14001240_chr17_60964300_20 | AAGTAGCCAGGAAAGCAGAA | chr17:60964441-60964461 | 602 |
| AXIN2 | chr17:60964782-60964923 | AXIN2_391611_R_14001241_chr17_60965463_20 | ACTCTACACCCGAACATGGG | chr17:60965023-60965043 | 602 |
| AXIN2 | chr17:60968034-60968137 | AXIN2_391609_L_14191482_chr17_60968058_20 | ATACCTCTCCCATTTCCACC | chr17:60967946-60967966 | 236 |
| AXIN2 | chr17:60968034-60968137 | AXIN2_391609_R_14191483_chr17_60968489_20 | ACATCTCTGTAAGCCTGTGG | chr17:60968162-60968182 | 236 |
| AXIN2 | chr17:60976099-60976240 | AXIN2_391607_L_13173636_chr17_60976125_20 | CAGCTGAGGATGACAGACGA | chr17:60976012-60976032 | 285 |
| AXIN2 | chr17:60976099-60976240 | AXIN2_391607_R_13173637_chr17_60976654_20 | TACCTGGGTTCTGGTGAGG  | chr17:60976277-60976297 | 285 |
| AXIN2 | chr17:60984385-60984765 | AXIN2_391598_L_13335216_chr17_60984135_20 | TGCCACTGTTTGAAGTCAGC | chr17:60984160-60984180 | 742 |

|       |                         |                                           |                      |                         |     |
|-------|-------------------------|-------------------------------------------|----------------------|-------------------------|-----|
| AXIN2 | chr17:60984385-60984765 | AXIN2_391598_R_13335217_chr17_60985578_20 | GAGGGAGAATGCGTGGATA  | chr17:60984882-60984902 | 742 |
| AXIN2 | chr17:60984766-60985145 | AXIN2_391599_L_13999190_chr17_60984236_20 | ACAGTTTCCGTGGACCTCAC | chr17:60984401-60984421 | 829 |
| AXIN2 | chr17:60984766-60985145 | AXIN2_391599_R_13999191_chr17_60985853_20 | CCAGACTCAGTGGGAAGAGC | chr17:60985210-60985230 | 829 |
| AXIN2 | chr17:60985146-60985316 | AXIN2_391600_L_13290816_chr17_60984818_20 | TATCCACGCATTTCTCCCTC | chr17:60984882-60984902 | 641 |
| AXIN2 | chr17:60985146-60985316 | AXIN2_391600_R_13290817_chr17_60986059_20 | AGTGTGACGGGAGCTCAGAT | chr17:60985503-60985523 | 641 |

**CTNNB1 SEQUENCING PRIMERS**

|        |                        |                                          |                         |                        |     |
|--------|------------------------|------------------------------------------|-------------------------|------------------------|-----|
| CTNNB1 | chr3:41240515-41240576 | CTNNB1_91704_L_8102522_chr3_41240153_20  | GATGGAGCTGTGGTTGAGGT    | chr3:41240334-41240354 | 400 |
| CTNNB1 | chr3:41240515-41240576 | CTNNB1_91704_R_8102523_chr3_41240912_20  | TTCACCAAGCCATTAGGAGG    | chr3:41240714-41240734 | 400 |
| CTNNB1 | chr3:41241020-41241248 | CTNNB1_91709_L_9805086_chr3_41240700_20  | TCACTGAGCTAACCCCTGGCT   | chr3:41240860-41240880 | 561 |
| CTNNB1 | chr3:41241020-41241248 | CTNNB1_91709_R_9805087_chr3_41241779_21  | TCCACAGTTCAGCATTTACCT   | chr3:41241400-41241421 | 561 |
| CTNNB1 | chr3:41241448-41241702 | CTNNB1_91710_L_11145498_chr3_41241110_24 | AAAGTCAGAATGCAGTTTGAGAA | chr3:41241279-41241303 | 623 |
| CTNNB1 | chr3:41241448-41241702 | CTNNB1_91710_R_11145499_chr3_41242315_20 | GCATGATAGCGTGTCTGGAA    | chr3:41241882-41241902 | 623 |
| CTNNB1 | chr3:41241828-41242067 | CTNNB1_91715_L_10891970_chr3_41241492_20 | TGCAATCCCTGAAGTACAAA    | chr3:41241660-41241680 | 588 |
| CTNNB1 | chr3:41241828-41242067 | CTNNB1_91715_R_10891971_chr3_41242627_20 | GCTAAACGCACTGCCATTTT    | chr3:41242228-41242248 | 588 |
| CTNNB1 | chr3:41242154-41242356 | CTNNB1_91718_L_10735170_chr3_41241830_20 | ACCTTTCCCATCTCGTAGG     | chr3:41241942-41242012 | 531 |
| CTNNB1 | chr3:41242154-41242356 | CTNNB1_91718_R_10735171_chr3_41242851_20 | TGGAATGGTGCATCCAGAA     | chr3:41242503-41242523 | 531 |
| CTNNB1 | chr3:41243702-41243847 | CTNNB1_91721_L_8205858_chr3_41243358_20  | GTTGGATAGGGCCCCAGTAT    | chr3:41243530-41243550 | 445 |
| CTNNB1 | chr3:41243702-41243847 | CTNNB1_91721_R_8205859_chr3_41244207_20  | TGGCTGCAACTGAATAGGA     | chr3:41243955-41243975 | 445 |
| CTNNB1 | chr3:41249835-41249939 | CTNNB1_91722_L_8039532_chr3_41249459_20  | TGAGGTGAACTGGCAAAGTG    | chr3:41249647-41249667 | 405 |
| CTNNB1 | chr3:41249835-41249939 | CTNNB1_91722_R_8039533_chr3_41250228_20  | GAGTCCCAAGGAGACCTTCC    | chr3:41250032-41250052 | 405 |
| CTNNB1 | chr3:41250023-41250362 | CTNNB1_91727_L_10823690_chr3_41249881_20 | TAAACTGGTGCCATGGGAA     | chr3:41249952-41249972 | 550 |
| CTNNB1 | chr3:41250023-41250362 | CTNNB1_91727_R_10823691_chr3_41250940_20 | CCTATCGCAGCATACTTCC     | chr3:41250482-41250502 | 550 |
| CTNNB1 | chr3:41250633-41250792 | CTNNB1_91730_L_11680246_chr3_41250339_20 | GTATGGCTGCGATAGGGGTA    | chr3:41250486-41250506 | 420 |
| CTNNB1 | chr3:41250633-41250792 | CTNNB1_91730_R_11680247_chr3_41251138_20 | GCTCTTCAAGGAGCGGATG     | chr3:41250886-41250906 | 420 |
| CTNNB1 | chr3:41252166-41252338 | CTNNB1_91731_L_10433136_chr3_41251924_20 | CAGGAGGCCTCTTTTCAGTG    | chr3:41252045-41252065 | 469 |
| CTNNB1 | chr3:41252166-41252338 | CTNNB1_91731_R_10433137_chr3_41252817_22 | CCTCCCTCTCAAGTCTCAA     | chr3:41252492-41252514 | 469 |
| CTNNB1 | chr3:41252843-41253223 | CTNNB1_91741_L_11445368_chr3_41252631_20 | TGTGAATGCCTCTTGCACTC    | chr3:41252737-41252757 | 585 |
| CTNNB1 | chr3:41252843-41253223 | CTNNB1_91741_R_11445369_chr3_41253760_20 | CAAGCCAGGGAACATCAAT     | chr3:41253302-41253322 | 585 |
| CTNNB1 | chr3:41254510-41254571 | CTNNB1_91746_L_10460176_chr3_41254174_22 | TCITTTGAGGTGTGGAGTTTGA  | chr3:41254342-41254364 | 413 |
| CTNNB1 | chr3:41254510-41254571 | CTNNB1_91746_R_10460177_chr3_41254959_20 | GCTCTGAATTCCTGTGCTC     | chr3:41254735-41254755 | 413 |
| CTNNB1 | chr3:41255628-41256008 | CTNNB1_91755_L_10104496_chr3_41255406_20 | TTGCTGCTGAACCTTGGATG    | chr3:41255517-41255537 | 684 |
| CTNNB1 | chr3:41255628-41256008 | CTNNB1_91755_R_10104497_chr3_41256733_20 | TCAGCAACTCTACAGGCCAA    | chr3:41256181-41256201 | 684 |

**GSK3B SEQUENCING PRIMERS**

|       |                          |                                           |                          |                          |     |
|-------|--------------------------|-------------------------------------------|--------------------------|--------------------------|-----|
| GSK3B | chr3:121028235-121028392 | GSK3B_505030_L_13942666_chr3_121028177_20 | CCTGGATCTCCCTCAAAGTG     | chr3:121028106-121028126 | 387 |
| GSK3B | chr3:121028235-121028392 | GSK3B_505030_R_13942667_chr3_121028910_20 | AGGCCATACAGTTCACAGCC     | chr3:121028473-121028493 | 387 |
| GSK3B | chr3:121044791-121044890 | GSK3B_505028_L_chr3_121044758             | atgttttttagaagacttagaagc |                          |     |
| GSK3B | chr3:121044791-121044890 | GSK3B_505028_R_chr3_121044980             | gcagaactttatttcaacttacc  |                          |     |
| GSK3B | chr3:121064955-121065142 | GSK3B_505025_L_14303778_chr3_121064949_20 | ATGTCCGTTTTTGTCTCTCA     | chr3:121064852-121064872 | 597 |
| GSK3B | chr3:121064955-121065142 | GSK3B_505025_R_14303779_chr3_121066102_20 | CTAGTTGTGCTGCCACCAG      | chr3:121065429-121065449 | 597 |
| GSK3B | chr3:121068126-121068165 | GSK3B_505024_L_15196428_chr3_121067636_20 | TCCGCTGCTCACTTCTTTCT     | chr3:121067781-121067801 | 437 |
| GSK3B | chr3:121068126-121068165 | GSK3B_505024_R_15196429_chr3_121068469_20 | TTTTGATTGACTTCCCCTG      | chr3:121068198-121068218 | 437 |
| GSK3B | chr3:121077949-121078045 | GSK3B_505022_L_14345070_chr3_121077689_20 | ACTGCCCTTACCTTGCAAAT     | chr3:121077719-121077739 | 409 |
| GSK3B | chr3:121077949-121078045 | GSK3B_505022_R_14345071_chr3_121078466_20 | CAGTGAATCCAATGCTGAA      | chr3:121078108-121078128 | 409 |
| GSK3B | chr3:121107291-121107389 | GSK3B_505020_L_chr3_121107170             | acgtgacctttgattgcttc     |                          |     |
| GSK3B | chr3:121107291-121107389 | GSK3B_505020_R_chr3_121107531             | tgactttttctgttttgattg    |                          |     |
| GSK3B | chr3:121114240-121114347 | GSK3B_505018_L_13875080_chr3_121114130_20 | tgacctATACATGTTTGCATCTCA | chr3:121114085-121114108 | 594 |
| GSK3B | chr3:121114240-121114347 | GSK3B_505018_R_13875081_chr3_121115277_20 | TTCTGCCCTGCTCTTTTGT      | chr3:121114659-121114679 | 594 |
| GSK3B | chr3:121117580-121117711 | GSK3B_505016_L_12998752_chr3_121117602_20 | GGCTGATATTGCAAAAGGAA     | chr3:121117491-121117511 | 359 |
| GSK3B | chr3:121117580-121117711 | GSK3B_505016_R_12998753_chr3_121118277_21 | TGAAAGGAAGATTGAGTGCCA    | chr3:121117829-121117850 | 359 |
| GSK3B | chr3:121124909-121125020 | GSK3B_505014_L_13377940_chr3_121124451_20 | CGCTCCTATTTTGGTTTGTG     | chr3:121124580-121124600 | 811 |
| GSK3B | chr3:121124909-121125020 | GSK3B_505014_R_13377941_chr3_121126032_20 | ccctgcccacGATACTTA       | chr3:121125371-121125391 | 811 |
| GSK3B | chr3:121148804-121148888 | GSK3B_505012_L_13663626_chr3_121148740_20 | GTATTGCTGGGGCAAGTGT      | chr3:121148672-121148692 | 320 |
| GSK3B | chr3:121148804-121148888 | GSK3B_505012_R_13663627_chr3_121149331_24 | GCTTGCTAATTTTGTGCTTAATG  | chr3:121148968-121148988 | 320 |
| GSK3B | chr3:121203582-121203776 | GSK3B_505010_L_14971080_chr3_121203534_20 | TTGAGCTGAACAAAATGCG      | chr3:121203458-121203478 | 364 |
| GSK3B | chr3:121203582-121203776 | GSK3B_505010_R_14971081_chr3_121204215_23 | TTCTTACAGTCTCTGTGAAAA    | chr3:121203799-121203822 | 364 |
| GSK3B | chr3:121294883-121295203 | GSK3B_505008_L_12163942_chr3_121294739_20 | GGGGGTATGGGAGGAGTAAA     | chr3:121294711-121294731 | 702 |
| GSK3B | chr3:121294883-121295203 | GSK3B_505008_R_12163943_chr3_121296102_20 | AGCGTGAGACTCGTGATCT      | chr3:121295393-121295413 | 702 |

**TCF4 SEQUENCING PRIMERS**

|      |                         |                                          |                            |                         |     |
|------|-------------------------|------------------------------------------|----------------------------|-------------------------|-----|
| TCF4 | chr18:51046445-51046590 | TCF4_663877_L_12645832_chr18_51045987_20 | CTTGGCTGTCGATTCATAA        | chr18:51046116-51046136 | 558 |
| TCF4 | chr18:51046445-51046590 | TCF4_663877_R_12645833_chr18_51047062_20 | CAGACACCCAAAGAGAGTGC       | chr18:51046654-51046674 | 558 |
| TCF4 | chr18:51047075-51047305 | TCF4_663870_L_13729952_chr18_51047091_20 | TGCTCTGCACTGCTCAAGAC       | chr18:51046983-51047003 | 449 |
| TCF4 | chr18:51047075-51047305 | TCF4_663870_R_13729953_chr18_51047948_20 | AATTCTGCCAAAACATGGC        | chr18:51047412-51047432 | 449 |
| TCF4 | chr18:51050737-51050900 | TCF4_663867_L_13647522_chr18_51050497_20 | AGCATTGGGTCCAGATTGAT       | chr18:51050517-51050537 | 569 |
| TCF4 | chr18:51050737-51050900 | TCF4_663867_R_13647523_chr18_51051594_20 | CCAATGCAGGGAAAACCTTG       | chr18:51051066-51051086 | 569 |
| TCF4 | chr18:51052776-51052912 | TCF4_663860_L_14769660_chr18_51052638_20 | TGCTCGGGGGAAGTCTCTAAA      | chr18:51052607-51052627 | 339 |
| TCF4 | chr18:51052776-51052912 | TCF4_663860_R_14769661_chr18_51053275_20 | TGCTCACCTCTCTGTTCTCT       | chr18:51052926-51052946 | 339 |
| TCF4 | chr18:51072725-51072929 | TCF4_663853_L_chr18_51072650             | acagcaacaatgatctatatctgaaa |                         |     |
| TCF4 | chr18:51072725-51072929 | TCF4_663853_R_chr18_51072983             | tttagccaccttttgaac         |                         |     |
| TCF4 | chr18:51075543-51075620 | TCF4_663846_L_13461627_chr18_51075375_20 | TGGTCTCCCATCTCCAAATA       | chr18:51075359-51075379 | 654 |
| TCF4 | chr18:51075543-51075620 | TCF4_663846_R_13461627_chr18_51076642_20 | CTGGTGCAGAAATTTGGTT        | chr18:51075993-51076013 | 654 |
| TCF4 | chr18:51078177-51078256 | TCF4_663839_L_chr18_51078082             | ggggaagtgaagttccacct       |                         |     |
| TCF4 | chr18:51078177-51078256 | TCF4_663839_R_chr18_51078343             | gaattgcttgcaacttcg         |                         |     |
| TCF4 | chr18:51079694-51079762 | TCF4_663832_L_13851154_chr18_51079252_20 | CTGGTCAATGTGCCACCATA       | chr18:51079373-51079393 | 437 |
| TCF4 | chr18:51079694-51079762 | TCF4_663832_R_13851155_chr18_51080085_20 | AGACGTCTCACTGCCTGGTT       | chr18:51079790-51079810 | 437 |
| TCF4 | chr18:51087773-51088152 | TCF4_663830_L_11914532_chr18_51087389_20 | AATTTCTGGCAACTGATGC        | chr18:51087451-51087501 | 743 |

|      |                         |                                          |                       |                         |     |
|------|-------------------------|------------------------------------------|-----------------------|-------------------------|-----|
| TCF4 | chr18:51087773-51088152 | TCF4_663830_R_11914533_chr18_51088834_20 | TATGGCCACCTTTTCTGCT   | chr18:51088204-51088224 | 743 |
| TCF4 | chr18:51088153-51088192 | TCF4_663831_L_13826410_chr18_51088177_20 | ATACTGTCTGCCCGTTGGC   | chr18:51088065-51088085 | 159 |
| TCF4 | chr18:51088153-51088192 | TCF4_663831_R_13826411_chr18_51088454_20 | TATGGCCACCTTTTCTGCT   | chr18:51088204-51088224 | 159 |
| TCF4 | chr18:51093847-51093981 | TCF4_663809_L_14378700_chr18_51093807_20 | AATGGGTGTGTGCCATTTTT  | chr18:51093727-51093747 | 301 |
| TCF4 | chr18:51093847-51093981 | TCF4_663809_R_14378701_chr18_51094368_20 | AAGGCTGAATGCCTCAGAAA  | chr18:51094008-51094028 | 301 |
| TCF4 | chr18:51097779-51097885 | TCF4_663801_L_14334270_chr18_51097455_20 | ACCATCATAAGCATCGGCTC  | chr18:51097517-51097537 | 713 |
| TCF4 | chr18:51097779-51097885 | TCF4_663801_R_14334271_chr18_51098840_20 | GCTTATGGGCCATCTGTGTT  | chr18:51098210-51098230 | 713 |
| TCF4 | chr18:51168587-51168637 | TCF4_663794_L_11950202_chr18_51168057_20 | TTCGCATGCAAAATCCATAAA | chr18:51168222-51168242 | 450 |
| TCF4 | chr18:51168587-51168637 | TCF4_663794_R_11950203_chr18_51168916_20 | TTTGGGAGCTGAAAGCATCT  | chr18:51168652-51168672 | 450 |
| TCF4 | chr18:51169102-51169232 | TCF4_663789_L_15251678_chr18_51169034_20 | GGCTGACAACCTGAGCCAAAT | chr18:51168968-51168988 | 337 |
| TCF4 | chr18:51169102-51169232 | TCF4_663789_R_15251679_chr18_51169667_20 | AACAATCAGTTGGGAGGTGG  | chr18:51169285-51169305 | 337 |
| TCF4 | chr18:51221682-51221747 | TCF4_663784_L_12045086_chr18_51221084_20 | ATTTAGGGCAATAGCCACCC  | chr18:51221283-51221303 | 563 |
| TCF4 | chr18:51221682-51221747 | TCF4_663784_R_12045087_chr18_51222169_20 | GTAACATCGGGGAAAGAGCA  | chr18:51221826-51221846 | 563 |
| TCF4 | chr18:51279247-51279344 | TCF4_663779_L_14635190_chr18_51278881_20 | CATTGAAACTGTGGTCCGTG  | chr18:51278964-51278984 | 771 |
| TCF4 | chr18:51279247-51279344 | TCF4_663779_R_14635191_chr18_51280382_20 | TGCCTAATTTCCCTTGTGG   | chr18:51279715-51279735 | 771 |
| TCF4 | chr18:51282304-51282366 | TCF4_663775_L_chr18_51282257             | acatatgtgggatctctggtt |                         |     |
| TCF4 | chr18:51282304-51282366 | TCF4_663775_R_chr18_51282488             | ccggtgcctgggtcttctaat |                         |     |
| TCF4 | chr18:51403508-51403581 | TCF4_663772_L_13830730_chr18_51403414_20 | ACCACTGATGGGTAATGCAA  | chr18:51403361-51403381 | 400 |
| TCF4 | chr18:51403508-51403581 | TCF4_663772_R_13830731_chr18_51404173_20 | TGGGGTGGGATCTGTAATGT  | chr18:51403741-51403761 | 400 |
| TCF4 | chr18:51405273-51405365 | TCF4_663770_L_12805532_chr18_51404923_20 | TTTCCACTGGGGTGAGATTC  | chr18:51404998-51405018 | 422 |
| TCF4 | chr18:51405273-51405365 | TCF4_663770_R_12805533_chr18_51405726_20 | TTCTCAAGGATTGGGACTG   | chr18:51405400-51405420 | 422 |

#### **FAT1 siRNA SEQUENCES**

|              |                                                                                                                                                                           |
|--------------|---------------------------------------------------------------------------------------------------------------------------------------------------------------------------|
| FAT1 si#1    | Qiagen Hs_FAT_7 (Catalog# S102664417)<br>Sequence: CCC UAC UAC GCC GUU GUU AAA                                                                                            |
| FAT1 si#2    | Ambion Silencer Select (Catalog #S5033)<br>Sequence: GGACCGAAAUCCUUCGAAtt                                                                                                 |
| b-catenin #1 | Santa Cruz Biotech (Catalog #sc29209)<br>Sequence: AGCUGAUUUGAUGGACAGTT                                                                                                   |
| b-catenin #2 | Thermo Scientific Dharmacon (Catalog #L-003482-00)<br>Pooled siRNA sequences:<br>GAUCCUAGCUAUCGUUCUU<br>UAAUGAGGACCUAUACUUA<br>GCGUUUGGCUGAACCAUCA<br>CGUACGAGCUGCUAUGUUC |



## **SUPPLEMENTARY NOTE ON CLINICAL SAMPLES**

Tumor samples were obtained at the time of surgery at Memorial Sloan-Kettering Cancer Center and University of California, Los Angeles. Matched normal tissue or peripheral blood was also obtained for each patient. All patients provided informed consent as part of institutional review board-approved protocols at the treating institution, Memorial Sloan-Kettering Cancer Center or University of California, Los Angeles.
